# Supplementary material for: Cost of managing atonic postpartum haemorrhage with uterine balloon tamponade devices in public health settings of Maharashtra, India: an economic microcosting study
Source: PubMed Central journal article supplement — BMJ Open. 2021 Mar 2;11(3):e042389. doi: 10.1136/bmjopen-2020-042389 (PMC7929829; doi:10.1136/bmjopen-2020-042389), 2021-03-02
Supplement: bmjopen-2020-042389.draft_revisions.pdf [file bmjopen-2020-042389.draft_revisions.pdf]

# BMJ Open

BMJ Open is committed to open peer review. As part of this commitment we make the peer review history of every article we publish publicly available.

When an article is published we post the peer reviewers' comments and the authors' responses online. We also post the versions of the paper that were used during peer review. These are the versions that the peer review comments apply to.

The versions of the paper that follow are the versions that were submitted during the peer review process. They are not the versions of record or the final published versions. They should not be cited or distributed as the published version of this manuscript.

BMJ Open is an open access journal and the full, final, typeset and author-corrected version of record of the manuscript is available on our site with no access controls, subscription charges or pay-per-view fees (<http://bmjopen.bmj.com>).

If you have any questions on BMJ Open's open peer review process please email [info.bmjopen@bmj.com](mailto:info.bmjopen@bmj.com)

# BMJ Open

## Cost of managing atonic postpartum hemorrhage using Uterine Balloon Tamponade at public health facilities in Maharashtra, India

|                               |                                                                                                                                                                                                                                                                                                                                                                                                                                                                                                                                      |
|-------------------------------|--------------------------------------------------------------------------------------------------------------------------------------------------------------------------------------------------------------------------------------------------------------------------------------------------------------------------------------------------------------------------------------------------------------------------------------------------------------------------------------------------------------------------------------|
| Journal:                      | <i>BMJ Open</i>                                                                                                                                                                                                                                                                                                                                                                                                                                                                                                                      |
| Manuscript ID                 | bmjopen-2020-042389                                                                                                                                                                                                                                                                                                                                                                                                                                                                                                                  |
| Article Type:                 | Original research                                                                                                                                                                                                                                                                                                                                                                                                                                                                                                                    |
| Date Submitted by the Author: | 03-Jul-2020                                                                                                                                                                                                                                                                                                                                                                                                                                                                                                                          |
| Complete List of Authors:     | Shetty, Siddesh; National Institute for Research in Reproductive Health, Regional Resource Hub for Health Technology Assessment in India Moray, Kusum; National Institute for Research in Reproductive Health, Regional Resource Hub for Health Technology Assessment in India Chaurasia, Himanshu; National Institute for Research in Reproductive Health, Regional Resource Hub for Health Technology Assessment in India Joshi, Beena; National Institute for Research in Reproductive Health, Department of Operational Research |
| Keywords:                     | Maternal medicine < OBSTETRICS, PUBLIC HEALTH, HEALTH ECONOMICS, Health economics < HEALTH SERVICES ADMINISTRATION & MANAGEMENT                                                                                                                                                                                                                                                                                                                                                                                                      |
|                               |                                                                                                                                                                                                                                                                                                                                                                                                                                                                                                                                      |

SCHOLARONE™  
Manuscripts

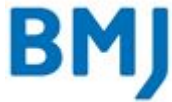

I, the Submitting Author has the right to grant and does grant on behalf of all authors of the Work (as defined in the below author licence), an exclusive licence and/or a non-exclusive licence for contributions from authors who are: i) UK Crown employees; ii) where BMJ has agreed a CC-BY licence shall apply, and/or iii) in accordance with the terms applicable for US Federal Government officers or employees acting as part of their official duties; on a worldwide, perpetual, irrevocable, royalty-free basis to BMJ Publishing Group Ltd ("BMJ") its licensees and where the relevant Journal is co-owned by BMJ to the co-owners of the Journal, to publish the Work in this journal and any other BMJ products and to exploit all rights, as set out in our [licence](#).

The Submitting Author accepts and understands that any supply made under these terms is made by BMJ to the Submitting Author unless you are acting as an employee on behalf of your employer or a postgraduate student of an affiliated institution which is paying any applicable article publishing charge ("APC") for Open Access articles. Where the Submitting Author wishes to make the Work available on an Open Access basis (and intends to pay the relevant APC), the terms of reuse of such Open Access shall be governed by a Creative Commons licence – details of these licences and which [Creative Commons](#) licence will apply to this Work are set out in our licence referred to above.

Other than as permitted in any relevant BMJ Author's Self Archiving Policies, I confirm this Work has not been accepted for publication elsewhere, is not being considered for publication elsewhere and does not duplicate material already published. I confirm all authors consent to publication of this Work and authorise the granting of this licence.

1  
2  
3 **Cost of managing atonic postpartum hemorrhage using Uterine Balloon Tamponade at**  
4  
5 **public health facilities in Maharashtra, India**  
6  
7  
8  
9  
10

11 **Authors and Affiliations:**  
12  
13  
14  
15

16 Dr. Siddesh Sitaram Shetty  
17

18  
19 Regional Resource Hub for Health Technology Assessment in India,  
20

21  
22 Indian Council of Medical Research - National Institute for Research in Reproductive Health, Mumbai,  
23  
24 India  
25

26  
27  
28  
29  
30 Dr. Kusum Venkobrao Moray  
31

32  
33 Regional Resource Hub for Health Technology Assessment in India,  
34

35  
36 Indian Council of Medical Research - National Institute for Research in Reproductive Health, Mumbai,  
37  
38 India  
39

40  
41  
42  
43 Mr. Himanshu Chaurasia  
44

45  
46 Regional Resource Hub for Health Technology Assessment in India,  
47

48  
49 Indian Council of Medical Research - National Institute for Research in Reproductive Health, Mumbai,  
50  
51 India  
52  
53  
54  
55  
56  
57  
58  
59  
60

1  
2  
3 Dr. Beena Nitin Joshi (**Corresponding Author**)  
4

5  
6 Department of Operational Research,  
7

8  
9 Indian Council of Medical Research - National Institute for Research in Reproductive Health, Mumbai  
10

11  
12 Jehangir Merwanji Street, Parel, Mumbai, Maharashtra, India  
13

14  
15 Phone number: +91-9820252672 / Office number: +(91-22)24192043  
16

17  
18 Email ID – bjoshithane@gmail.com  
19  
20  
21  
22  
23  
24

25  
26 Manuscript word count - 4076  
27  
28  
29  
30  
31  
32  
33  
34  
35  
36  
37  
38  
39  
40  
41  
42  
43  
44  
45  
46  
47  
48  
49  
50  
51  
52  
53  
54  
55  
56  
57  
58  
59  
60

# Cost of managing atonic postpartum hemorrhage using Uterine Balloon Tamponade at public health facilities in Maharashtra, India

## ABSTRACT

### Objective

Post-partum hemorrhage (PPH) is the leading preventable cause of maternal mortality. India offers free treatment for pregnancy and related complications in its public health facilities. Uterine Balloon Tamponade (UBT) is recommended for refractory atonic PPH management. This study estimated health system costs of managing atonic PPH with condom-UBT, Every Second Matters (ESM) UBT and Bakri balloon UBT, three commonly used UBT devices in Maharashtra, India

### Design

Health system cost estimation using primary bottom-up economic costing, data from Health Management Information System (HMIS) and published literature for event probabilities.

### Settings

Four public health facilities from the state of Maharashtra, India representing primary, secondary and tertiary level care were chosen for primary costing.

### Outcome measures

Unit, package and annual costs for managing atonic PPH using three UBT devices. This included medical management, UBT insertion and surgical intervention costs in the public health system of Maharashtra for the year 2017-18.

### Results

1  
2  
3 Cost of medical management for atonic PPH in Maharashtra is USD 37 (95% CI 29-45) per case, increasing  
4  
5 to USD 44 (95% CI 36-53) if condom-UBT and surgical interventions are needed. Similar cost was reported  
6  
7 for ESM-UBT device. Use of Bakri-UBT reported a higher cost of USD 59 (95% CI 46-73) per atonic PPH  
8  
9 case. Implied package and annual costs incurred by the public health system of Maharashtra in managing  
10  
11 atonic PPH was estimated.  
12

### 13 14 **Conclusions**

15  
16  
17 Atonic PPH management in public health facilities of Maharashtra using condom-UBT, ESM-UBT or Bakri  
18  
19 UBT accounts to 3.8%, 3.8% or 5.2% of the annual health spending on reproductive and child health  
20  
21 services. The study results can guide policy makers in planning budgetary allocations for atonic PPH  
22  
23 management. This data can be used in economic evaluation studies to determine cost-effectiveness of UBT  
24  
25 intervention in public health settings of India.  
26  
27  
28  
29  
30

### 31 **Strengths and limitations of this study**

- 32  
33
- 34 • To our knowledge, this is the first study from India comprehensively assessing public health  
35 system costs in overall management of atonic PPH with uterine balloon tamponade, medical and  
36 surgical interventions across public healthcare levels  
37
  - 38 • The study uses clinical effectiveness data of individual uterine balloon tamponade devices to  
39 determine health system costs  
40
  - 41 • As disaggregated HMIS data in the study setting was not available for PPH, literature-based  
42 probability estimates were used to derive costs  
43
  - 44 • An assumption was made that all atonic PPH patients eligible for UBT insertion would receive it  
45 and a uniform UBT device would be available across all facilities  
46  
47  
48  
49  
50  
51  
52  
53  
54  
55  
56  
57  
58  
59  
60

## INTRODUCTION

The global shift towards Universal Health Coverage (UHC) as indicated by Sustainable Development Goals (SDG) needs robust financing mechanisms. To achieve desired targets, evidence informed by costing studies can be vital to support financing decisions. Information on cost enables improved resource allocation, thus strengthening policy measures to attain highest value for a given investment. A key priority under the SDG health goal is reduction of maternal mortality level to less than 70 per 100,000 live births by the year 2030. Evidence confirms women's health to be associated with development and economic performance of a country.[1] A marginal health investment is found to have higher effects on health outcomes at lower GDP levels, seen commonly in low or low-middle income countries.[2] Improved maternal health not only reduces household healthcare expenditure but is associated with long term economic benefits to the society.

In spite of a low spending of 1% of GDP on public health expenditure, India has successfully reduced maternal mortality ratio down to 122 per 100,000 live births by the year 2015-17, attributable largely to reforms such as the institutionalization of deliveries, providing free cashless services to pregnant women and addressing social determinants of health.[3-5] Despite ongoing efforts, India still accounts for nearly one-fifth of all maternal deaths globally with hemorrhage as the leading cause.[6] Post-Partum Hemorrhage (PPH) accounts for more than two-third of all global maternal deaths due to bleeding.[7,8] PPH is defined as maternal blood loss of 500 ml or more within 24 hours after delivery and affects 3-6% of all women giving birth.[9] Atony of uterus is the most common PPH type responsible for 80% of all cases in India.[10]

Indian guidelines base PPH management on principles of shock treatment, cause-specific PPH management, and patient stabilization before referral to higher facilities.[11] India has initiated standardization of labour rooms (LR) under the 'Dakshata' initiative, equipping delivery rooms to provide comprehensive care at all times. In accordance with the WHO guideline for atonic PPH management, uterotonics remain the mainstay treatment in India.[12] Hemodynamic stabilization and supportive resuscitation measures are to be kept ongoing. Use of UBT device is recommended if uterotonic agents fail



1  
2  
3 in controlling atonic PPH bleeding. All atonic PPH cases at primary level care in India are expected to be  
4 provided with medical management and UBT intervention measures to stabilize and control bleeding before  
5 referral to a higher facility for observation or further interventions. Cases uncontrolled after UBT insertion  
6 at secondary or tertiary level may require B-Lynch compression suturing, stepwise devascularization  
7 surgery (uterine, or internal iliac artery ligation) or other procedures based on the availability of expertise  
8 and infrastructure. Hysterectomy, a lifesaving procedure is indicated after failed conservative measures or  
9 directly after UBT insertion depending on patient response. Obstetric intensive care unit (ICU) admission  
10 may be needed for observation or managing complications due to PPH.  
11  
12

13  
14  
15  
16  
17  
18  
19  
20  
21 UBT intervention for atonic PPH is a relatively simple life-saving technique that can be used even in low  
22 resource settings with limited provisions for surgery, blood transfusion or referral mechanisms. UBT  
23 technique is clinically effective in controlling PPH bleeding and acts as a step avoiding further surgical  
24 interventions.[13] Timely use of the UBT device can potentially lead to cost-saving by improving maternal  
25 morbidity and mortality outcomes. Multiple UBT devices specifically designed, assembled or modified for  
26 use in PPH management are available. Being economical, assembled condom-UBT device is the  
27 recommended standard of care (SOC) for atonic PPH management in India.[14] In the state of Maharashtra  
28 where this study was undertaken, apart from recommended condom-UBT device, Bakri balloon and ESM-  
29 UBT, two ready to use sterile pack devices for atonic PPH management and used across different public  
30 health settings.[15–17] The three UBT devices have certain distinct features giving each an advantage over  
31 the other. Literature reports varying clinical effectiveness rates for the UBT devices in controlling atonic  
32 PPH and they differ widely in costs. Table 1 shows the distinct characteristics of these UBT devices used  
33 for atonic PPH management derived from an extensive literature review undertaken separately.  
34  
35  
36  
37  
38  
39  
40  
41  
42  
43  
44  
45  
46  
47  
48  
49  
50  
51  
52  
53  
54  
55  
56  
57  
58  
59  
60

Table 1: Characteristics of UBT devices used commonly for atonic PPH management in India

| UBT device        | Cost of device*                                                | Clinical effectiveness | Advantages                                                                                                                                                      |
|-------------------|----------------------------------------------------------------|------------------------|-----------------------------------------------------------------------------------------------------------------------------------------------------------------|
| Condom-UBT        | USD 2<br>(INR 128)<br>Available in facilities                  | 92.3%                  | Inexpensive,<br>Assembled using available resources,<br>Modified versions are used to assess blood loss post insertion                                          |
| ESM-UBT           | USD 6<br>(INR 397)<br>Currently not available over the counter | 95.3%**                | Relatively inexpensive,<br>Specifically designed for PPH use,<br>All components needed for assembly available in a sterile pack,<br>US-FDA approved device      |
| Bakri Balloon UBT | USD 148<br>(INR 9,554)<br>Available over the counter           | 84.3%                  | Ready to use,<br>Specifically designed for PPH use,<br>Comes in a sterile pack,<br>Has drainage outlet to measure ongoing blood loss,<br>US-FDA approved device |

\* - Derived from facility purchase lists and online available resources

\*\* - Strength of evidence is low, based on limited evidence available from three case series studies

Under India's flagship public health insurance scheme Pradhan Mantri Jan Arogya Yojana (PMJAY), a patient is entitled to a treatment package cost of USD 178 (INR 11,500) for high risk vaginal and all cesarean section deliveries to ensure institutional deliveries. Though package cost for institutional delivery in India is determined, costs for handling a post-partum complication like PPH is not available at present.

Moreover, choosing a specific UBT device has cost and outcome implications for the health system and if not examined, can result in catastrophic expenditure for the beneficiaries. This study aimed to calculate public health system costs of atonic PPH management using the recommended condom-UBT device with similar projections for different UBTs such as the ESM-UBT and Bakri balloon UBT used in the Indian public health settings.

## METHODS

This costing study was part of a Health Technology Assessment (HTA) project evaluating UBT devices for atonic PPH management in India. An economic costing from the health system perspective using primary bottom-up costing, data from HMIS and literature review for event probabilities was used to determine and compare unit, package and annual costs of managing atonic PPH at different levels of public healthcare facilities in Maharashtra, India. Health system costs of three commonly used UBT alternatives such as condom-UBT, ESM-UBT or Bakri balloon UBT was assessed. The study was approved by the NIRRH Ethics Committee for Clinical Studies (Approval number: D/ICEC/Sci-29/31/2018). State health department administrative approvals and consent from the respective health facility authority was obtained before undertaking the study. There was no patient or public involvement in this study and hence no consent was needed.

### Study settings:

Maternal healthcare in the Indian public system is delivered through a three-tier system. The facilities in this study were classified depending on availability of services for atonic PPH management. The primary level of care for PPH management comprises of Primary Health Centres (PHC) and is equipped with skilled birth attendants and a medical officer. Secondary level is made by the Community Health Centres (CHC) and Sub-District Hospitals (SDH) which additionally are equipped with obstetrics-gynecology (OBGYN) specialist, operation theater (OT), and facilities for blood transfusion. Tertiary level comprises of District Hospitals (DH) and medical colleges with additional advanced intervention and ICU facilities.[18,19] The

1  
2  
3 study enrolled four public health facilities from the state of Maharashtra to ensure representation of all three  
4 levels of care. A convenience sample of one PHC, SDH, DH, and a tertiary medical college from Mumbai  
5 metropolitan region in Maharashtra was chosen for data collection.  
6  
7  
8

### 9 10 **Data collection:**

11  
12 Cost data for one-year duration from April 2017 to March 2018 was collected by adapting a validated  
13 standard tool developed for costing of health services in India.[20] Cost resources were broadly classified  
14 into human resources, infrastructure, medical equipment, non-medical equipment, drugs, consumables, and  
15 utilities such as electricity, water, and laundry. Consumption data for these resources were obtained from  
16 Hospital Management Information System (HMIS) for patient-level information, electronic hospital  
17 records, written registers, building plan of health facilities, salary slips, bills, etc. from statements of the  
18 accounts department. Additionally, staff interviews were undertaken to assess time spent on different  
19 activities for time allocation. A total of 16 doctors, 26 nursing staff, 5 pharmacists and 11 administrative  
20 staff across chosen study facilities were interviewed. For example, doctors were asked for time spent on  
21 each patient in out-patient department (OPD), in-patient department (IPD), surgery, and other routine tasks  
22 but the time spent by the senior-most doctor in performing an obstetric hysterectomy out of all routine tasks  
23 was used to derive time allocation statistic for costing of obstetric hysterectomy procedure. Floor area  
24 measurement and facility observations for details on infrastructure of the IPD, LR, ICU, laboratory,  
25 pharmacy and administration were undertaken as needed. As facility HMIS did not report specific PPH  
26 data, literature based estimates for incidence of atonic PPH in Indian settings, clinical effectiveness of the  
27 three UBT devices in controlling atonic PPH, probability of undergoing a specific surgical intervention,  
28 surgery success rates, morbidity, mortality related to PPH were used to determine unit, package and annual  
29 costs for atonic PPH management in Maharashtra, India.[9,10,21–23] Table 2 enlists the parameters used  
30 to determine service utilization for PPH across chosen facilities.  
31  
32  
33  
34  
35  
36  
37  
38  
39  
40  
41  
42  
43  
44  
45  
46  
47  
48  
49  
50  
51  
52  
53  
54  
55  
56  
57  
58  
59  
60

Table 2: Parameters used to determine service utilization for atonic PPH management in Maharashtra based on event probability from literature

| Parameter                                                                                      | Value in cost analysis*                    | Source                |
|------------------------------------------------------------------------------------------------|--------------------------------------------|-----------------------|
| Annual number of deliveries at primary level facility (1 PHC)                                  | Vaginal – 494                              | Facility HMIS 2017-18 |
| Annual number of deliveries at secondary level facility (1 SDH)                                | Vaginal – 1526<br>Caesarean section – 330  | Facility HMIS 2017-18 |
| Annual number of deliveries at tertiary level facilities (1 DH & 1 Medical college)            | Vaginal – 5188<br>Caesarean section – 2186 | Facility HMIS 2017-18 |
| Incidence of PPH in vaginal deliveries in India                                                | 3%                                         | 9, 21                 |
| Incidence of PPH in cesarean section deliveries in India                                       | 6%                                         | 9, 21                 |
| Probability of PPH due to uterine atony in India                                               | 0.80                                       | 10                    |
| Probability of atonic PPH controlled with medical management                                   | 0.90                                       | 23                    |
| Probability of stepwise devascularization surgical procedures for uncontrolled cases after UBT | 0.85                                       | 23                    |
| Probability of obstetric hysterectomy surgery for uncontrolled cases after UBT                 | 0.15                                       | 23                    |

\* - Values relevant to the Indian context

### Data analysis:

For analysis, cost resources were classified into capital and recurrent cost items. Capital resource items were annualized using a 3% discount rate and factoring in life expectancy and annual maintenance rate of the items.[24] For shared or jointly used resources, apportioning factors were used depending on the type of resource utilized. Monetary value was obtained from the individual facility purchase lists. Data was analyzed using Microsoft Excel 2016. Worksheets were developed for cost calculation of each component at each facility followed by aggregating costs to the level of care separately for each UBT. For example, unit condom UBT insertion cost at DH and medical college was aggregated to get a unit condom UBT insertion cost at tertiary level. All the costs are presented in United States Dollars (USD) and Indian National Rupee (INR) currency. A conversion rate of 1 USD = 64.5 INR for the year 2017-18 was used.[25]

#### Unit costs

We derived unit costs for individual component of atonic PPH management algorithm at each facility as mentioned in the Indian guidelines. This include unit costs of medical management for atonic PPH, UBT insertion cost for refractory cases, devascularization surgery, hysterectomy, IPD admission per patient, ICU admission per patient, and unit cost of patient referral. Unit cost of UBT insertion included cost of the UBT device. Unit cost of medical management, referral and IPD admission were expected to remain unaffected irrespective of the type of the UBT device used. For such services, costs were calculated only for SOC treatment i.e. management using condom-UBT device.

#### Package costs

To account for treatment combinations used in management of atonic PPH, package costs were determined. For a certain treatment, package cost was calculated by adding unit costs associated with all treatment components at that particular healthcare level. For all patients accessing primary level and for those at secondary level requiring ICU services, referral costs were added to get package costs.

#### Annual costs

1  
2  
3 Unit and package cost calculation was followed by annual health system cost estimation for all women of  
4 Maharashtra availing public healthcare facilities for atonic PPH. This consists of the combined annual cost  
5 of medical management, further course of interventions using UBT device in uncontrolled cases and  
6 training cost for UBT use. Unit cost for every treatment component at each facility was first aggregated to  
7 primary, secondary and tertiary level and then applied to the annual population cohort using  
8 epidemiological and clinical parameters relevant for each specific UBT device to calculate annual costs.  
9

10  
11  
12  
13  
14  
15  
16 Certain methodological assumptions were made for data analysis. It was assumed that all women eligible  
17 for UBT insertion would receive the device and would uniformly get a single UBT type across all facilities.  
18  
19 It was assumed that at primary level, all women after medical management or UBT insertion would  
20 immediately be referred to secondary level. Unit cost for IPD and ICU admission per patient was based on  
21 per day calculation for an admitted OBGYN patient followed by apportioning to the average length of stay  
22 for atonic PPH.[26–28] Cost of blood transfusion and other resuscitation measures were incorporated in  
23 unit costs throughout management and have not been calculated separately. Training costs were estimated  
24 for one day training of healthcare providers.[29] Certain assumptions were made due to the unavailability  
25 of relevant data. Health system referral cost for all primary care patients and those from secondary level  
26 requiring ICU in this study was obtained from a published Indian study after making inflation  
27 adjustment.[30] B-Lynch suturing and stepwise devascularization surgery in this study were considered a  
28 single unit for cost calculation.  
29  
30  
31  
32  
33  
34  
35  
36  
37  
38  
39  
40  
41

42 Probabilistic sensitivity analysis was used to address joint uncertainty effect of input parameters on costs.  
43  
44 A beta distribution for probabilities and proportions and a gamma distribution for cost and resource use was  
45 assigned before varying the parameters on both sides. As drugs and consumables show wide variation in  
46 prices, these were varied by 99% whereas UBT device price was assumed to vary by 50%. Remaining  
47 parameters such as salaries, rental prices, medical and non-medical equipment, utilities and utilization of  
48 services were varied by 25%.[31] This was followed by running Monte Carlo simulations to obtain 1000  
49 cost estimates. These estimates were then used to determine 95% confidence interval (CI) limit for all costs.  
50  
51  
52  
53  
54  
55  
56  
57  
58  
59  
60

## RESULTS

The chosen sample of four public health facilities from Maharashtra reported 7,208 vaginal and 2,516 cesarean section deliveries in the year 2017-18. Of the 9,724 total deliveries, 293 women were expected to experience atonic PPH. Twenty-nine out of 293 cases would remain uncontrolled in spite of medical management, thus becoming eligible for UBT device insertion. Further, depending on clinical effectiveness of the individual UBT device in controlling bleeding, remaining cases would undergo surgical intervention depending on infrastructure and resource availability at respective clinical setting.

### Unit costs:

Medical management of atonic PPH costs the health system USD 0.7 (INR 42), USD 5 (INR 322) and USD 9.4 (INR 609) per patient at primary, secondary and tertiary level respectively. For uncontrolled cases requiring further intervention, condom-UBT (SOC) insertion costs USD 2.5 (INR 160), USD 5.3 (INR 339) and USD 6.5 (INR 422) at the three respective levels. Devascularization surgery for uncontrolled cases after condom-UBT insertion costs the health system USD 75.4 (INR 4864) per case at secondary and USD 52.9 (INR 3,418) per case at tertiary level. Similarly, hysterectomy procedure costs USD 120.6 (INR 7,782) per case at secondary and USD 84.8 (INR 5,471) at tertiary level. Table 3 provides information on health system unit costs for condom-UBT, ESM-UBT and Bakri balloon. IPD admission for an atonic PPH case costs the health system USD 27.5 (INR 1,776) per patient at secondary and USD 28.0 (INR 1,806) per patient at tertiary level. ICU admission at tertiary facility costs the health system USD 75.9 (INR 4,900) per patient getting admitted for atonic PPH management. Cost of transport or referral of a patient in the Indian public health system after inflation adjustment was USD 15.5 (INR 1,001) per case. One-time training of medical officers and OBGYN specialists across public health facilities of Maharashtra costs USD 12.1 (INR 778) per eligible case for UBT device insertion.



Table 3: Unit costs for atonic PPH management across public health facility levels in Maharashtra, India [1

USD = 64.5 INR]

| Facility level                                                         | Medical management | UBT insertion          | Devascularization    | Hysterectomy          | Inpatient Admission | ICU admission        |
|------------------------------------------------------------------------|--------------------|------------------------|----------------------|-----------------------|---------------------|----------------------|
| Per patient unit cost with Condom-UBT in USD (95% Confidence interval) |                    |                        |                      |                       |                     |                      |
| Primary                                                                | 0.7<br>(0.4-0.9)   | 2.5<br>(1.5-3.5)       | NA                   | NA                    | NA                  | NA                   |
| Secondary                                                              | 5.0<br>(3.6-6.5)   | 5.3<br>(4.1-6.5)       | 75.4<br>(49.7-105)   | 120.6<br>(80.1-165.3) | 27.5<br>(16.2-40.1) | NA                   |
| Tertiary                                                               | 9.4<br>(6.6-12.7)  | 6.5<br>(5.4-8)         | 52.9<br>(42-64.9)    | 84.8<br>(67.1-104)    | 28.0<br>(20.3-36.2) | 75.9<br>(50.2-104.7) |
| Per patient unit cost with ESM-UBT in USD (95% Confidence interval)    |                    |                        |                      |                       |                     |                      |
| Primary                                                                | 0.7<br>(0.4-0.9)   | 6.7<br>(3.7-9.7)       | NA                   | NA                    | NA                  | NA                   |
| Secondary                                                              | 5.0<br>(3.6-6.5)   | 8.8<br>(6.1-11.5)      | 56.9<br>(37.5-77.6)  | 119.9<br>(76.6-163.7) | 27.5<br>(16.2-40.1) | NA                   |
| Tertiary                                                               | 9.4<br>(6.6-12.7)  | 10.4<br>(8.5-12.4)     | 51.7<br>(40.7-63.0)  | 86.5<br>(68.6-106.6)  | 28.0<br>(20.3-36.2) | 75.9<br>(50.2-104.7) |
| Per patient unit cost with Bakri-UBT in USD (95% Confidence interval)  |                    |                        |                      |                       |                     |                      |
| Primary                                                                | 0.7<br>(0.4-0.9)   | 148.6<br>(74.8-223.4)  | NA                   | NA                    | NA                  | NA                   |
| Secondary                                                              | 5.0<br>(3.6-6.5)   | 151.1<br>(88.8-215.8)  | 76.8<br>(50.9-106.1) | 119.7<br>(76.8-166.8) | 27.5<br>(16.2-40.1) | NA                   |
| Tertiary                                                               | 9.4<br>(6.6-12.7)  | 153.1<br>(111.5-194.4) | 53.0<br>(41.5-64.9)  | 84.8<br>(66.7-104.8)  | 28.0<br>(20.3-36.2) | 75.9<br>(50.2-104.7) |

**Package cost:**

Of the eligible cases, condom-UBT successfully controls 92.3% of the cases after device insertion and

|                                                                                                | Condom UBT      | ESM UBT         | Bakri UBT          |
|------------------------------------------------------------------------------------------------|-----------------|-----------------|--------------------|
| Package cost for atonic PPH controlled after UBT insertion in USD<br>(95% Confidence interval) |                 |                 |                    |
| Primary                                                                                        | 46.2<br>(35-58) | 50.4<br>(38-63) | 192.3<br>(153-233) |
| Secondary                                                                                      | 37.8            | 41.3            | 184.1              |

ongoing medical and resuscitation measures. This combined treatment costs the health system a total of USD 46.2 (INR 2,979), USD 37.8 (INR 2,437) and USD 43.9 (INR 2,837) at three respective levels. This package consists costs of medical management, UBT insertion, IPD admission and additional referral cost for primary level care. Package cost of control with devascularization surgery group after condom-UBT insertion and medical treatment costs the health system a total of USD 113.2 (INR 7,301) and USD 96.9 (INR 6,255) per patient at secondary and tertiary levels respectively. Similarly, a direct hysterectomy for uncontrolled atonic PPH after UBT insertion costs USD 158.4 (INR 10,218) and USD 128.8 (INR 8,308) at secondary and tertiary level care. Less than 4% of the uncontrolled atonic PPH cases are expected to require ICU facility for atonic PPH management. Health system package costs for such treatment combinations can be derived from the given unit cost table. Alternatively, if ESM or Bakri-UBT device is used in controlling atonic PPH, package costs are expected to vary depending on the effectiveness of respective UBT. Table 4 lists package cost estimates for atonic PPH management with three UBT devices.

|                                                                                                                             |                    |                    |                    |
|-----------------------------------------------------------------------------------------------------------------------------|--------------------|--------------------|--------------------|
|                                                                                                                             | (28-49)            | (31.8-52.1)        | (146-223)          |
| Tertiary                                                                                                                    | 43.9<br>(35-54)    | 47.8<br>(39-58)    | 190.4<br>(152-230) |
| Package cost for atonic PPH controlled with devascularization surgery after UBT failure in USD<br>(95% Confidence interval) |                    |                    |                    |
| Secondary                                                                                                                   | 113.2<br>(92-134)  | 98.2<br>(81-116)   | 260.9<br>(217-305) |
| Tertiary                                                                                                                    | 96.9<br>(81-114)   | 99.6<br>(84-116)   | 243.5<br>(203-285) |
| Package cost for atonic PPH controlled with direct hysterectomy after UBT failure in USD<br>(95% Confidence interval)       |                    |                    |                    |
| Secondary                                                                                                                   | 158.4<br>(128-192) | 161.1<br>(152-172) | 303.8<br>(252-354) |
| Tertiary                                                                                                                    | 128.8<br>(106-152) | 134.4<br>(112-159) | 275.3<br>(229-323) |

Table 4: Package cost for atonic PPH management across public healthcare levels in Maharashtra, India [1 USD = 64.5 INR] (95% Confidence interval)

#### Annual costs:

Annual cost to the public health system was estimated for managing 27,915 women experiencing atonic PPH annually out of the 969,264 deliveries reported by the state of Maharashtra in the year 2017-18.[32] The estimated annual cost of medical management for atonic PPH was USD 1,032,647 (INR 6,66,05,750) or USD 36.9 (INR 2,386) per atonic PPH patient. Additionally, 2,791 women were estimated to require

UBT intervention followed by devascularization surgery, hysterectomy or ICU facility for uncontrolled cases. The annual cost of managing these uncontrolled cases in public health facilities of Maharashtra, India is USD 193,963 (INR 1,25,10,610) for condom-UBT, USD 188,090 (INR 1,21,31,800) for ESM-UBT and USD 620,297 (INR 4,00,09,169) for Bakri-UBT if used in atonic PPH management. This corresponds to a UBT insertion per eligible beneficiary cost of USD 69.5 (INR 4,482) for condom-UBT, USD 67.4 (INR 4,346) for ESM-UBT and USD 222.2 (INR 14,333) for Bakri-UBT. Overall, the health system incurs a per atonic PPH patient treatment cost of USD 43.9 (INR 2,834) if condom-UBT, USD 43.7 (INR 2,820) if ESM-UBT and USD 59.2 (INR 3,819) per case if Bakri-UBT is made available and used in atonic PPH management. Table 5 describes the annual health system cost of atonic PPH management in Maharashtra, India.

Table 5: Annual public health system cost of managing atonic PPH using three UBT devices in Maharashtra, India [1 USD = 64.5 INR] (95% Confidence interval)

| Cost centre | Condom-UBT<br>USD (95% CI) | ESM-UBT<br>USD (95% CI) | Bakri-UBT<br>USD (95% CI) |
|-------------|----------------------------|-------------------------|---------------------------|
|             |                            |                         |                           |

|                                                                                    |                                 |                                 |                                  |
|------------------------------------------------------------------------------------|---------------------------------|---------------------------------|----------------------------------|
| Atonic PPH medical management cost<br>(a)                                          | 1,032,647<br>(688893 – 1375716) |                                 |                                  |
| Atonic PPH medical management cost per case                                        | 36.9<br>(29-45)                 |                                 |                                  |
| UBT training cost<br>(b)                                                           | 34,109<br>(25817 – 42579)       |                                 |                                  |
| UBT device cost                                                                    | 5,540<br>(2362 – 8664)          | 17,182<br>(7324 – 26770)        | 413,485<br>(180,326 – 652,695)   |
| Uncontrolled atonic PPH management cost with UBT and surgical interventions<br>(c) | 193,963<br>(152,772 – 232,481)  | 188,090<br>(150393 – 226901)    | 620,297<br>(386981 – 857415)     |
| Uncontrolled atonic PPH management cost per case                                   | 69.5<br>(47 – 94)               | 67.4<br>(47 – 88)               | 222.2<br>(145 – 299)             |
| Annual total cost for atonic PPH management<br>(a + b + c)                         | 1,226,610<br>(870250 – 1581596) | 1,220,737<br>(876187 – 1566385) | 1,652,944<br>(1224827 – 2061670) |
| Cost of atonic PPH management per case                                             | 43.9<br>(36 – 53)               | 43.7<br>(35 – 52)               | 59.2<br>(46 – 73)                |

## DISCUSSION

To our knowledge, this is the first study comprehensively assessing public health system costs associated with atonic PPH management in India. A study conducted in Myanmar at a 25 bedded hospital reported cost of PPH management along with other obstetric complications.[33] Similarly, an Egypt study reported

1  
2  
3 estimates of direct health system costs for different procedures used in PPH management from two district  
4 hospitals.[34] Our study specifically estimates health system costs of managing atonic PPH across all  
5 healthcare levels in the Indian public health system as per its guidelines. This paper focuses on estimating  
6 cost implications of using different uterine balloon tamponade techniques to control atonic PPH bleeding  
7 with their reported clinical effectiveness. Additionally, we have undertaken costing of medical  
8 management, surgical interventions subsequent to failed UBT treatment and patient referral across all  
9 public healthcare levels of India.

10  
11 Our analysis reports a total cost of USD 43.9 (95% CI 36-53) per atonic PPH patient for condom-UBT,  
12 USD 43.7 (95% CI 35–52) for ESM-UBT and USD 59.2 (95% CI 46-73) for Bakri-UBT use in  
13 Maharashtra's public health system for the year 2017-18. The study from Myanmar reports an inflation  
14 adjusted unit cost of USD 28 ( $\pm 1.61$ ) per case for managing PPH in their hospital study setting.[35] The  
15 Egypt study reports an adjusted treatment cost of USD 110 per case for PPH but reports use of UBT  
16 intervention in 3.9% cases as compared to 9.9% in our study. As primary data was not available, the  
17 assumption that all those needing UBT intervention would receive it could be one of the reasons for lower  
18 unit costs in our study as there would be reduction in subsequent surgical interventions. Neither of the two  
19 studies reported costs for UBT intervention separately.

20  
21 The unit cost of medical management for atonic PPH case in our study was USD 36.9 (INR 2,386). Unit  
22 cost of UBT device insertion increased gradually with higher facility level and was dominated by the cost  
23 of the UBT device. Package costs for UBT insertion at primary level included referral cost and hence  
24 reported higher costs as compared to secondary or tertiary level. Unit and package costs for surgical  
25 intervention subsequent to UBT failure was found to be higher at secondary level as compared to tertiary  
26 level in our study. Tertiary level hysterectomy cost at USD 84.8 (INR 5,471) per case in our study is in a  
27 similar range as reported by another Indian study at an adjusted cost of USD 95.7 (INR 6174) at district  
28 hospital.[36] Likewise, stepwise devascularization surgery in the Egypt study reported an adjusted cost of  
29 USD 62 per case, along the same range as reported in our findings. Unit and package surgical costs in our

1  
2  
3 study varied depending on clinical effectiveness of the UBT device affecting consumption of resources.  
4  
5 Cost of condom-UBT device in Indian public health facilities was USD 1.9 (INR 128), one-third the price  
6  
7 of ESM-UBT device. Bakri balloon at a market price of USD 148 (INR 9554) in India, costs significantly  
8  
9 higher in comparison to the other two devices. Bakri-UBT at a higher price and lower reported clinical  
10  
11 effectiveness in controlling atonic PPH, accounted for higher unfavorable unit and package costs in our  
12  
13 analysis. ESM-UBT reported a marginally higher clinical effectiveness but had a three-time higher device  
14  
15 cost as compared to condom-UBT. The unit cost however for both condom and ESM-UBT was similar at  
16  
17 USD 43.9 (INR 2,834) and USD 43.9 (INR 2820).  
18  
19

20  
21 Cost of medical management of atonic PPH across healthcare levels in this study constitutes a major  
22  
23 component of annual costs (84.2% for Condom-UBT, 84.6% for ESM-UBT and 62.5% for Bakri-UBT).  
24  
25 This is expected as majority patients are controlled with uterotonics and supportive measures. Remaining  
26  
27 portion of annual costs are accounted by UBT and subsequent interventions for uncontrolled cases (15.8%  
28  
29 for condom-UBT, 15.4% for ESM-UBT and 37.5% for Bakri-UBT). Both condom and ESM-UBT have  
30  
31 lower unit, package and annual costs as compared to Bakri-UBT. However, the strength of clinical  
32  
33 effectiveness evidence available for ESM-UBT at the time this study was conducted was limited to a few  
34  
35 case series studies.[37–39]. Cost implication for using ESM-UBT device would vary if higher quality of  
36  
37 clinical effectiveness evidence and procurement cost for equipping all Indian public health facilities  
38  
39 uniformly with the device is made available. The cost of UBT device itself as a proportion of the annual  
40  
41 cost accounted to 0.5% for condom-UBT, 1.4% for ESM-UBT and 25% for Bakri-UBT. In the absence of  
42  
43 UBT intervention, uncontrolled atonic PPH cases would need surgical intervention, thus inflating overall  
44  
45 costs for the health system and having an impact on maternal morbidity and mortality outcomes.  
46  
47

48  
49 The state of Maharashtra in the year 2017-18 would have spent USD 1,226,610 (INR 7,91,16,359) if it  
50  
51 catered to all atonic PPH cases in public facilities with condom-UBT as per treatment guidelines.  
52  
53 Alternatively, if ESM-UBT or Bakri Balloon was used, the state would spend USD 1,220,737 (INR  
54  
55 7,87,37,549) or USD 1,652,944 (INR 10,66,14,919) respectively. Atonic PPH management using condom-  
56  
57  
58  
59  
60

1  
2  
3 UBT in Maharashtra thus accounted for 3.8% of the annual spending on Reproductive and Child Health  
4 (RCH) activities in the year 2017-18.[40,41] With ESM or Bakri-UBT in place, atonic PPH management  
5 would account for 3.8% or 5.2% of the annual RCH spending.  
6  
7  
8  
9

10 This study has empirically derived costs for atonic PPH management across public healthcare levels for a  
11 state in India. The WHO guideline development group has identified use of uterine balloon tamponade in  
12 PPH as a research priority.[42] Our study provides evidence for equipping health systems with a choice for  
13 a clinically effective UBT intervention that is affordable and suitable for low resource settings like India.  
14 Findings of this study can be used to optimize efficiency by improving financial allocation within the health  
15 system. Under the revised Janani Shishu Suraksha Karyakaram (JSSK) scheme in India, pregnant women  
16 accessing public facilities are entitled to free treatment for childbirth and pregnancy complications.[43]  
17 However, studies have reported relatively higher out of pocket expenditures among women with post-  
18 delivery complications availing these entitlements.[44] The PMJAY scheme has revised high risk and  
19 caesarean section delivery package costs to USD 178 (INR 11,500). This package is inclusive of drugs,  
20 diagnostics, consultations, procedures, stay and food for the patient availing care.[45] The results from our  
21 study can be used to address package costs for the post-partum PPH complication across different publicly  
22 financed health schemes to reduce the financial burden on beneficiaries.  
23  
24  
25  
26  
27  
28  
29  
30  
31  
32  
33  
34  
35  
36  
37

### 38 **Limitations:**

39  
40  
41 The study bases its cost findings from one region of Maharashtra by collecting data from sample facilities  
42 across healthcare levels. Given the differences within districts and across states in India, provisioning and  
43 utilization of healthcare services vary on account of epidemiological, social and contextual factors.  
44 Although we have undertaken an uncertainty analysis to address these factors to an extent, generalizability  
45 of the study across India may be difficult. For analysis, it was assumed that all atonic PPH cases requiring  
46 UBT intervention will receive it and a uniform UBT device would be available across all facilities.  
47 However, in practice this might differ resulting in deviation of cost estimates from those reported. Facility  
48  
49  
50  
51  
52  
53  
54  
55  
56  
57  
58  
59  
60



1  
2  
3 level disaggregated HMIS data on PPH and corresponding service utilization was not available, so we had  
4  
5 to rely on literature-based probabilities to derive service utilization for costing.  
6  
7

## 8 **CONCLUSION**

9

10 The study provides health system costs for managing atonic PPH complication in public facilities of India.  
11  
12 Policy makers can use cost estimates to inform budgetary allocation decisions to equip the Indian health  
13  
14 system with a suitable UBT device choice. However, programs must optimize performance of the health  
15  
16 providers, equip facilities and supply lines with the right commodities and ensure efficient referral systems  
17  
18 necessary to save a woman's life. This cost evidence can be used to undertake economic evaluation for  
19  
20 UBT device options at public health facilities in India to determine the most cost-effective choice.  
21  
22  
23  
24  
25  
26  
27  
28  
29  
30  
31  
32  
33  
34  
35  
36  
37  
38  
39  
40  
41  
42  
43  
44  
45  
46  
47  
48  
49  
50  
51

## 52 **Acknowledgements**

53  
54  
55  
56  
57  
58  
59  
60

1  
2  
3 We acknowledge the support provided by the Department of Health Research (DHR), MOHFW,  
4 Government of India. We are grateful to Dr. Dinesh Baswal (Deputy Commissioner Maternal Health  
5 Division, MOHFW, India) for suggesting the topic to HTAIn and Dr. Smita Mahale (Director, NIRRH-  
6 ICMR, Mumbai, India) for their encouragement and support. We acknowledge the technical support  
7 provided by HTAIn, DHR and the project staff at the institute. We are grateful for the inputs provided by  
8 experts Dr. Niranjana Maydeo (Professor and Head, Department of Obstetrics and Gynecology, King  
9 Edward Memorial Hospital, Mumbai, India), Dr. Anushree Patil (Scientist E, Clinical Research, NIRRH-  
10 ICMR, Mumbai, India), Dr. Amita Pandey (Professor, Department of Obstetrics and Gynecology, King  
11 George's Medical University, Lucknow, India), Dr. Vanita Suri (Professor and Head, Department of  
12 Obstetrics and Gynecology, Postgraduate Institute of Medical Education and Research, Chandigarh, India)  
13 and Dr. Amit Patel (Program Director, Jivdaya Foundation, Texas, United States of America)  
14  
15  
16  
17  
18  
19  
20  
21  
22  
23  
24  
25  
26

### 27 **Author Contributions**

28  
29  
30 BJ, SS and KM were responsible for conceptualization and design of the study. KM and HC undertook data  
31 collection. SS and KM analyzed the data. BJ checked the analysis and edited the manuscript. SS was  
32 responsible for the first draft and all authors contributed to further revisions. All authors read and approved  
33 the final manuscript.  
34  
35  
36  
37  
38

### 39 **Funding statement**

40  
41 This work was supported by HTAIn, Department of Health Research, Ministry of Health and Family  
42 Welfare, Government of India grant number T.11011/02/2017-HR  
43  
44  
45

### 46 **Competing interests**

47  
48  
49 None declared  
50  
51

### 52 **Patient consent**

53  
54  
55 Not required  
56  
57  
58  
59  
60

1  
2  
3  
4  
5  
6  
7  
8  
9  
10  
11  
12  
13  
14  
15  
16  
17  
18  
19  
20  
21  
22  
23  
24  
25  
26  
27  
28  
29  
30  
31  
32  
33  
34  
35  
36  
37  
38  
39  
40  
41  
42  
43  
44  
45  
46  
47  
48  
49  
50  
51  
52  
53  
54  
55  
56  
57  
58  
59  
60

**Data sharing statement**

All unpublished data are available upon reasonable request to the corresponding author BJ through E-mail

For peer review only

**REFERENCES**

- 1 Onarheim KH, Iversen JH, Bloom DE. Economic benefits of investing in women's health: A systematic review. *PLoS One*. 2016;**11**:1–23. doi:10.1371/journal.pone.0150120
- 2 Amiri A, Gerdtham U. Impact of maternal and child health on economic growth: New evidence based granger causality and DEA analysis. *Partnersh Matern Newborn Child Heal (PMNCH), World Heal Organ* 2013;:1–30. [http://www.who.int/pmnch/topics/part\\_publications/201303\\_Econ\\_benefits\\_econometric\\_study.pdf](http://www.who.int/pmnch/topics/part_publications/201303_Econ_benefits_econometric_study.pdf)
- 3 Registrar General of India. SPECIAL BULLETIN ON MATERNAL MORTALITY IN INDIA 2015-17 SAMPLE REGISTRATION SYSTEM OFFICE OF REGISTRAR GENERAL, INDIA. 2019. <http://www.censusindia.gov.in> (accessed 15 Apr 2020).
- 4 Singh PK. India has achieved groundbreaking success in reducing maternal mortality. *WHO Reg. Off. South-East Asia*. 2016;:2016. <https://www.who.int/southeastasia/news/detail/10-06-2018-india-has-achieved-groundbreaking-success-in-reducing-maternal-mortality> (accessed 15 Apr 2020).
- 5 DGHS. National Health Profile 2018 13 th Issue. 2018. [www.who.int/classifications](http://www.who.int/classifications)
- 6 The World Bank. Number of maternal deaths | Data. 2015. [https://data.worldbank.org/indicator/SH.MMR.DTHS?most\\_recent\\_value\\_desc=true](https://data.worldbank.org/indicator/SH.MMR.DTHS?most_recent_value_desc=true) (accessed 15 Apr 2020).
- 7 Welfare F. Health and Family Welfare Statistics in India 2017. 2017.
- 8 Say L, Chou D, Gemmill A, *et al*. Global causes of maternal death: A WHO systematic analysis. *Lancet Glob Heal* 2014;**2**:323–33. doi:10.1016/S2214-109X(14)70227-X
- 9 Rastogi A, Zahid. Postpartum haemorrhage | National Health Portal Of India. *Natl. Heal. Portal India*. 2017. <https://www.nhp.gov.in/disease/gynaecology-and-obstetrics/postpartum-haemorrhage> (accessed 15 Jun 2020).
- 10 Dutta D. *Textbook of Obstetrics*. 2015.
- 11 Guidelines- MH :: National Health Mission. <https://nhm.gov.in/index1.php?lang=1&level=3&sublinkid=839&lid=377> (accessed 8 Jun 2020).
- 12 Dept. of Reproductive Health and Research W. WHO recommendations for the prevention and treatment of postpartum haemorrhage. 2012. [www.who.int/maternal\\_child\\_adolescent](http://www.who.int/maternal_child_adolescent) (accessed 5 Feb 2020).
- 13 Suarez S, Conde-Agudelo A, Borovac-Pinheiro A, *et al*. Uterine balloon tamponade for the treatment of postpartum hemorrhage: a systematic review and meta-analysis. *Am J Obstet Gynecol* Published Online First: 2020. doi:10.1016/j.ajog.2019.11.1287
- 14 Division MH, Welfare F. Guidance Note on Prevention and Management of Postpartum Haemorrhage. 2015;:1–28.
- 15 Maternal Health — Jiv Daya Foundation. <https://www.jivdayafound.org/maternal-health> (accessed 3 Jun 2020).
- 16 MGIMS, Govt of India, NHSRC and Harvard discuss PPH management. <https://www.mgims.ac.in/index.php/component/easyblog/392-govt-of-india-discusses-the-management-of-pph-at-mgims?Itemid=1> (accessed 3 Jun 2020).

- 1  
2  
3 17 'Harvard' helps State's 11 medical colleges to reduce maternal deaths due to PPH - The Hitavada.  
4 [https://www.thehitavada.com/Encyc/2020/3/3/-Harvard-helps-State-s-11-medical-colleges-to-](https://www.thehitavada.com/Encyc/2020/3/3/-Harvard-helps-State-s-11-medical-colleges-to-reduce-maternal-deaths-due-to-PPH.html)  
5 [reduce-maternal-deaths-due-to-PPH.html](https://www.thehitavada.com/Encyc/2020/3/3/-Harvard-helps-State-s-11-medical-colleges-to-reduce-maternal-deaths-due-to-PPH.html) (accessed 3 Jun 2020).  
6  
7 18 MOHFW G of I. Indian Public Health Standards: National Health Mission.  
8 2007.<https://nhm.gov.in/index1.php?lang=1&level=2&sublinkid=971&lid=154> (accessed 17 Apr  
9 2020).  
10  
11 19 National Rural Health Mission. Operational Guidelines on Maternal and Newborn Health.  
12 2009;:54.  
13  
14 20 Department of Community Medicine and School of Public Health PGIMER Chandigarh.  
15 [https://www.healthconomics.pgisph.in/costing\\_web/index.php?action=costing\\_method](https://www.healthconomics.pgisph.in/costing_web/index.php?action=costing_method) (accessed  
16 17 Apr 2020).  
17  
18 21 Carroli G, Cuesta C, Abalos E, *et al.* Epidemiology of postpartum haemorrhage: a systematic  
19 review. *Best Pract. Res. Clin. Obstet. Gynaecol.* 2008;**22**:999–1012.  
20 doi:10.1016/j.bpobgyn.2008.08.004  
21  
22 22 Aderoba AK, Olagbuji BN, Akintan AL, *et al.* Condom-catheter tamponade for the treatment of  
23 postpartum haemorrhage and factors associated with success: a prospective observational study.  
24 *BJOG An Int J Obstet Gynaecol* 2017;**124**:1764–71. doi:10.1111/1471-0528.14361  
25  
26 23 Tasneem F, Sirsam S, Shanbhag V. Clinical study of post partum haemorrhage from a teaching  
27 hospital in Maharashtra, India. *Int J Reprod Contraception, Obstet Gynecol* 2017;**6**:2366.  
28 doi:10.18203/2320-1770.ijrcog20172314  
29  
30 24 Department of Health Research. *Health Technology Assessment in India A Manual.* 2018.  
31 <https://dhr.gov.in/> (accessed 1 Jul 2020).  
32  
33 25 World Bank. World Development Indicators | The World Bank. World Dev. Indic. 2018;:Table  
34 2.15. doi:<http://wdi.worldbank.org/table/3.2>  
35  
36 26 Marshall AL, Durani U, Bartley A, *et al.* The impact of postpartum hemorrhage on hospital length  
37 of stay and inpatient mortality: a National Inpatient Sample-based analysis. *Am J Obstet Gynecol*  
38 2017;**217**:344.e1-344.e6. doi:10.1016/j.ajog.2017.05.004  
39  
40 27 Joseph CM, Bhatia G, Abraham V, *et al.* Obstetric admissions to tertiary level intensive care unit –  
41 Prevalence, clinical characteristics and outcomes. *Indian J Anaesth* 2018;**62**:940–4.  
42 doi:10.4103/ija.IJA\_537\_18  
43  
44 28 Kumar P, Dhillon P. Length of stay after childbirth in India: A comparative study of public and  
45 private health institutions. *BMC Pregnancy Childbirth* 2020;**20**:181. doi:10.1186/s12884-020-  
46 2839-9  
47  
48 29 Ministry of Health and Family Welfare (Government of India). National Health Profile (NHP) of  
49 India- 2018 : Central Bureau of Health Intelligence. Published Online First:  
50 2018.<https://www.cbhidghs.nic.in/index1.php?lang=1&level=2&sublinkid=88&lid=1138>  
51 (accessed 1 Jul 2020).  
52  
53 30 Prinja S, Manchanda N, Aggarwal AK, *et al.* Cost & efficiency evaluation of a publicly financed  
54 & publicly delivered referral transport service model in three districts of Haryana State , India.  
55 2013;:1003–11.  
56  
57 31 Chauhan AS, Prinja S, Ghoshal S, *et al.* Cost of treatment for head and neck cancer in India. *PLoS*  
58 *One* 2018;**13**:1–13. doi:10.1371/journal.pone.0191132  
59  
60

- 1  
2  
3 32 Indicators AD. State Fact Sheet : FY 2018-2019 ( April -March ) Maharashtra Key Indicators.  
4 2019;**2019**.
- 5  
6 33 Thi Win Shwe A, Riewpaiboon A, Chaikledkaew U, *et al*. Treatment cost and costing model of  
7 obstetric complications at a hospital in Myanmar. *PLoS One* 2019;**14**:e0213141.  
8 doi:10.1371/journal.pone.0213141
- 9  
10 34 Vlassoff M, Abdalla HA, Gor V. The Cost to the Health System of Postpartum Hemorrhage in  
11 Egypt Key Points. Published Online First: 2016. www.gutmacher.org (accessed 6 Jun 2020).
- 12  
13 35 CPI Inflation Calculator. [https://data.bls.gov/cgi-](https://data.bls.gov/cgi-bin/cpicalc.pl?cost1=27.04&year1=201506&year2=201706)  
14 [bin/cpicalc.pl?cost1=27.04&year1=201506&year2=201706](https://data.bls.gov/cgi-bin/cpicalc.pl?cost1=27.04&year1=201506&year2=201706) (accessed 6 Jun 2020).
- 15  
16 36 Chatterjee S, Laxminarayan R. Costs of surgical procedures in Indian hospitals. *BMJ Open*  
17 2013;**3**. doi:10.1136/bmjopen-2013-002844
- 18  
19 37 Burke TF, Danso-Bamfo S, Guha M, *et al*. Shock progression and survival after use of a condom  
20 uterine balloon tamponade package in women with uncontrolled postpartum hemorrhage. *Int J*  
21 *Gynecol Obstet* 2017;**139**:34–8. doi:10.1002/ijgo.12251
- 22  
23 38 Burke TF, Ahn R, Nelson BD, *et al*. A postpartum haemorrhage package with condom uterine  
24 balloon tamponade: a prospective multi-centre case series in Kenya, Sierra Leone, Senegal, and  
25 Nepal. *BJOG An Int J Obstet Gynaecol* 2016;**123**:1532–40. doi:10.1111/1471-0528.13550
- 26  
27 39 Ramanathan A, Eckardt MJ, Nelson BD, *et al*. Safety of a condom uterine balloon tamponade  
28 (ESM-UBT) device for uncontrolled primary postpartum hemorrhage among facilities in Kenya  
29 and Sierra Leone. *BMC Pregnancy Childbirth* 2018;**18**:1–7. doi:10.1186/s12884-018-1808-z
- 30  
31 40 Machinery NHM, Transfer F. NHM in Maharashtra : Budget Trends 2015-16 to 2018-19. 2018.
- 32  
33 41 National Health Mission, Ministry of Health and Family Welfare, Government of India. National  
34 Urban Health Mission :: National Health Mission.  
35 2020;**12**. <https://nhm.gov.in/index1.php?lang=1&level=1&sublinkid=970&lid=137>
- 36  
37 42 Dept. of Reproductive Health and Research W. WHO recommendations for the prevention and  
38 treatment of postpartum haemorrhage. 2012. [www.who.int/maternal\\_child\\_adolescent](http://www.who.int/maternal_child_adolescent) (accessed  
39 11 Jun 2020).
- 40  
41 43 NavjaatShishu Suraksha Karyakram (NSSK). National Health Mission.  
42 <https://nhm.gov.in/index1.php?lang=1&level=3&sublinkid=842&lid=308> (accessed 7 Jun 2020).
- 43  
44 44 Issac A, Chatterjee S, Srivastava A, *et al*. Out of pocket expenditure to deliver at public health  
45 facilities in India: A cross sectional analysis. *Reprod Health* 2016;**13**. doi:10.1186/s12978-016-  
46 0221-1
- 47  
48 45 Ayushman Bharat I National Health Authority | GoI.  
49 <https://www.pmjay.gov.in/resources/documents> (accessed 7 Jun 2020).
- 50  
51  
52  
53  
54  
55  
56  
57  
58  
59  
60

# BMJ Open

## Cost of managing atonic postpartum hemorrhage with uterine balloon tamponade devices in public health settings of Maharashtra, India: An economic micro-costing study

|                                 |                                                                                                                                                                                                                                                                                                                                                                                                                                                                                                                                      |
|---------------------------------|--------------------------------------------------------------------------------------------------------------------------------------------------------------------------------------------------------------------------------------------------------------------------------------------------------------------------------------------------------------------------------------------------------------------------------------------------------------------------------------------------------------------------------------|
| Journal:                        | <i>BMJ Open</i>                                                                                                                                                                                                                                                                                                                                                                                                                                                                                                                      |
| Manuscript ID                   | bmjopen-2020-042389.R1                                                                                                                                                                                                                                                                                                                                                                                                                                                                                                               |
| Article Type:                   | Original research                                                                                                                                                                                                                                                                                                                                                                                                                                                                                                                    |
| Date Submitted by the Author:   | 24-Nov-2020                                                                                                                                                                                                                                                                                                                                                                                                                                                                                                                          |
| Complete List of Authors:       | Shetty, Siddesh; National Institute for Research in Reproductive Health, Regional Resource Hub for Health Technology Assessment in India Moray, Kusum; National Institute for Research in Reproductive Health, Regional Resource Hub for Health Technology Assessment in India Chaurasia, Himanshu; National Institute for Research in Reproductive Health, Regional Resource Hub for Health Technology Assessment in India Joshi, Beena; National Institute for Research in Reproductive Health, Department of Operational Research |
| <b>Primary Subject Heading</b>: | Health economics                                                                                                                                                                                                                                                                                                                                                                                                                                                                                                                     |
| Secondary Subject Heading:      | Obstetrics and gynaecology, Public health, Health policy                                                                                                                                                                                                                                                                                                                                                                                                                                                                             |
| Keywords:                       | Maternal medicine < OBSTETRICS, PUBLIC HEALTH, HEALTH ECONOMICS, Health economics < HEALTH SERVICES ADMINISTRATION & MANAGEMENT                                                                                                                                                                                                                                                                                                                                                                                                      |
|                                 |                                                                                                                                                                                                                                                                                                                                                                                                                                                                                                                                      |

SCHOLARONE™  
Manuscripts



I, the Submitting Author has the right to grant and does grant on behalf of all authors of the Work (as defined in the below author licence), an exclusive licence and/or a non-exclusive licence for contributions from authors who are: i) UK Crown employees; ii) where BMJ has agreed a CC-BY licence shall apply, and/or iii) in accordance with the terms applicable for US Federal Government officers or employees acting as part of their official duties; on a worldwide, perpetual, irrevocable, royalty-free basis to BMJ Publishing Group Ltd ("BMJ") its licensees and where the relevant Journal is co-owned by BMJ to the co-owners of the Journal, to publish the Work in this journal and any other BMJ products and to exploit all rights, as set out in our [licence](#).

The Submitting Author accepts and understands that any supply made under these terms is made by BMJ to the Submitting Author unless you are acting as an employee on behalf of your employer or a postgraduate student of an affiliated institution which is paying any applicable article publishing charge ("APC") for Open Access articles. Where the Submitting Author wishes to make the Work available on an Open Access basis (and intends to pay the relevant APC), the terms of reuse of such Open Access shall be governed by a Creative Commons licence – details of these licences and which [Creative Commons](#) licence will apply to this Work are set out in our licence referred to above.

Other than as permitted in any relevant BMJ Author's Self Archiving Policies, I confirm this Work has not been accepted for publication elsewhere, is not being considered for publication elsewhere and does not duplicate material already published. I confirm all authors consent to publication of this Work and authorise the granting of this licence.



1  
2  
3 1 **Cost of managing atonic postpartum hemorrhage with uterine balloon tamponade devices**  
4  
5 2 **in public health settings of Maharashtra, India: An economic micro-costing study**  
6  
7  
8  
9 3

10  
11 4 **Authors and Affiliations:**  
12  
13  
14 5

15  
16 6 Dr. Siddesh Sitaram Shetty

17  
18  
19 7 Regional Resource Hub for Health Technology Assessment in India,  
20

21  
22 8 Indian Council of Medical Research - National Institute for Research in Reproductive Health, Mumbai,  
23  
24 9 India  
25  
26

27 10  
28  
29  
30 11 Dr. Kusum Venkobrao Moray

31  
32 12 Regional Resource Hub for Health Technology Assessment in India,  
33

34  
35 13 Indian Council of Medical Research - National Institute for Research in Reproductive Health, Mumbai,  
36  
37 14 India  
38  
39

40 15  
41  
42  
43 16 Mr. Himanshu Chaurasia

44  
45  
46 17 Regional Resource Hub for Health Technology Assessment in India,  
47

48  
49 18 Indian Council of Medical Research - National Institute for Research in Reproductive Health, Mumbai,  
50  
51 19 India  
52  
53

54 20  
55  
56  
57  
58  
59  
60

1  
2  
3 1 Dr. Beena Nitin Joshi (**Corresponding Author**)  
4

5  
6 2 Department of Operational Research,  
7

8  
9 3 Indian Council of Medical Research - National Institute for Research in Reproductive Health, Mumbai  
10

11 4 Jehangir Merwanji Street, Parel, Mumbai, Maharashtra, India  
12

13  
14 5 Phone number: +91-9820252672 / Office number: +(91-22)24192043  
15

16  
17 6 Email ID – bjoshithane@gmail.com  
18

19  
20 7  
21

22 8 **Manuscript details**  
23

24  
25 9 Abstract – 300 words  
26

27  
28 10 Manuscript – 4530 words  
29

30  
31 11 Tables – 5  
32

33  
34 12 Supplementary material file 1  
35

36  
37 13 Research Checklist  
38

39  
40 14  
41

42  
43 15  
44

45 16 **Keywords**  
46

47 17 Economic costing, postpartum hemorrhage, Uterine balloon tamponade, public health system cost  
48

49  
50 18  
51

52  
53 19  
54

55  
56 20  
57

1  
2  
3 1 **Cost of managing atonic postpartum hemorrhage with uterine balloon tamponade devices**  
4  
5 2 **in public health settings of Maharashtra, India: An economic micro-costing study**  
6  
7  
8  
9 3

10  
11 4 **ABSTRACT**  
12  
13

14 5 **Objective**

15  
16  
17 6 Post-partum hemorrhage (PPH) is the worldwide leading cause of preventable maternal mortality. India  
18  
19 7 offers free treatment for pregnancy and related complications in its public health facilities. Management  
20  
21 8 with Uterine Balloon Tamponade (UBT) is recommended for refractory atonic PPH cases. As part of health  
22  
23 9 technology assessment to determine the most cost-effective UBT device, this study estimated costs of atonic  
24  
25 10 PPH management with condom-UBT, Every Second Matters (ESM) UBT and Bakri balloon UBT in the  
26  
27 11 public health system of Maharashtra, India.  
28  
29

30 12 **Design**

31  
32  
33 13 Health system cost estimation using primary economic micro-costing, data from Health Management  
34  
35 14 Information System (HMIS) and published literature for event probabilities.  
36  
37

38 15 **Settings**

39  
40 16 Four public health facilities from the state of Maharashtra, India representing primary, secondary and  
41  
42 17 tertiary level care were chosen for primary costing.  
43  
44

45 18 **Outcome measures**

46  
47  
48 19 The outcomes measured were unit, package and annual costs of atonic PPH management with three UBT  
49  
50 20 devices. This included cost of medical management, UBT intervention and PPH related surgeries  
51  
52 21 undertaken in public health system of Maharashtra in the year 2017-18.  
53  
54

55 22 **Results**  
56  
57  
58  
59  
60

1  
2  
3 1 Medical management of atonic PPH cost the health system USD 37 (95% CI 29-45) per case, increasing to  
4  
5 2 USD 44 (95% CI 36-53) with condom-UBT and surgical interventions for uncontrolled cases. Similar cost  
6  
7 3 was estimated for ESM-UBT. Bakri-UBT reported a higher cost of USD 59 (95% CI 46-73) per case.  
8  
9 4 Overall annual cost of managing all atonic PPH cases in Maharashtra was USD 1,226,610 (95% CI 870,250  
10  
11 5 – 1,581,596).

## 6 **Conclusions**

7 Atonic PPH management in public health facilities of Maharashtra with condom-UBT, ESM-UBT or Bakri  
8  
9 8 UBT use accounts to 3.8%, 3.8% or 5.2% of the state's annual spending on reproductive and child health  
10  
11 9 services. These findings can guide policy makers to include the PPH complication in publicly financed  
12  
13 10 health schemes. Economic evaluation studies can use this evidence to determine UBT cost-effectiveness in  
14  
15 11 Indian settings.

## 13 **Strengths and limitations of this study**

- 14  
15  
16  
17  
18  
19  
20  
21  
22  
23
- To our knowledge, this is the first study from India comprehensively assessing public health system costs in overall management of atonic PPH with medical interventions, uterine balloon tamponade and surgical management across all public healthcare levels in the state
  - The study uses clinical effectiveness of individual uterine balloon tamponade devices to determine health system costs
  - As disaggregated HMIS data in the study setting was not available for PPH, literature-based event probability estimates from the Indian context were used to estimate costs
  - An assumption was made that for a particular UBT device, all eligible cases would receive only that particular UBT across all facilities.

## 1 INTRODUCTION

2 The global shift towards Universal Health Coverage (UHC) indicated by Sustainable Development Goals  
3 (SDG) needs robust financing mechanisms. To achieve desired targets, evidence informed by costing  
4 studies can be vital to support financing decisions. Information on cost enables improved resource  
5 allocation, thus strengthening policy measures to attain high value for a given investment. A key priority  
6 under the SDG health goal is reduction of maternal mortality level to less than 70 per 100,000 live births  
7 by the year 2030. Evidence confirms women's health to be associated with development and economic  
8 performance of a country.[1] A marginal health investment at lower GDP levels seen commonly in low or  
9 low-middle income countries is found to have higher effects on health outcomes.[2] Improved maternal  
10 health not only reduces household healthcare expenditure, but is also associated with long term economic  
11 benefits to the society.

12 In spite of a low spending of 1% of GDP on public health expenditure, India has managed to reduce maternal  
13 mortality ratio down to 122 per 100,000 live births by the year 2015-17, largely attributed to reforms such  
14 as institutionalization of deliveries, provisioning of free cashless services to pregnant women and  
15 addressing social determinants of health.[3-5] Despite ongoing efforts, India still accounts for nearly one-  
16 fifth of all maternal deaths globally with hemorrhage as its leading cause.[6] Post-Partum Hemorrhage  
17 (PPH) accounts for more than two-third of all global maternal deaths due to bleeding.[7,8] PPH is defined  
18 as maternal blood loss of 500 ml or more within 24 hours after delivery and affects nearly 3-6% of all  
19 women giving birth in India.[9] Atony of uterus is the most common PPH type responsible for 80% of all  
20 cases.[10]

21 Indian guidelines base PPH management on principles of treatment for shock, cause-specific PPH  
22 management and patient stabilization before referral to higher facilities.[11] India has initiated  
23 standardization of Labour Rooms (LR) under the 'Dakshata' initiative, equipping delivery rooms to provide  
24 comprehensive care at all times. In accordance with the WHO guideline for atonic PPH management,  
25 uterotonics remain the mainstay of treatment in India.[12] Hemodynamic stabilization and supportive

1  
2  
3 1 resuscitation measures are expected to be ongoing. Use of UBT device is recommended if uterotonic agents  
4  
5 2 fail in controlling atonic PPH bleeding. At primary level in India, all atonic PPH cases are expected to be  
6  
7 3 provided with medical management and UBT intervention to stabilize and control bleeding before referral  
8  
9 4 to a higher facility for observation or further interventions. Cases uncontrolled after UBT insertion at  
10  
11 5 secondary or tertiary level may require B-Lynch compression suturing, stepwise devascularization surgery  
12  
13 6 (uterine, or internal iliac artery ligation) or other procedures depending on availability of expertise and  
14  
15 7 facility infrastructure. Hysterectomy, a lifesaving procedure is indicated after failed conservative measures  
16  
17 8 or directly after UBT insertion based on patient response. Obstetric intensive care (ICU) admission may be  
18  
19 9 needed for observation or managing complications due to PPH.

20  
21  
22  
23 10 UBT intervention for atonic PPH is a relatively simple life-saving technique that can be used even in low  
24  
25 11 resource settings with limited provisions for surgery, blood transfusion or referral mechanisms. UBT  
26  
27 12 technique is clinically effective in controlling PPH bleeding and reduces need for further surgical  
28  
29 13 interventions.[13] Timely use of UBT device can potentially be cost-saving by improving maternal  
30  
31 14 morbidity and mortality outcomes. Multiple UBT devices specifically designed, assembled or modified for  
32  
33 15 use in PPH management are available. Being economical, an assembled condom-UBT device is the  
34  
35 16 recommended standard of care (SOC) for atonic PPH management in India.[14] In the state of Maharashtra  
36  
37 17 where this study was undertaken, apart from the recommended condom-UBT device, Bakri balloon and  
38  
39 18 ESM-UBT, two ready to use sterile packed devices made available by non-governmental organizations are  
40  
41 19 being used across different public health settings.[15–17] The three UBT devices have certain distinct  
42  
43 20 features giving each an advantage over the other. Literature reports varying clinical effectiveness and price  
44  
45 21 for these UBT devices. Table 1 shows distinct characteristics of these three UBT devices used in atonic  
46  
47 22 PPH management, collated from a literature review undertaken separately. (Supplementary material 1)

48  
49  
50  
51 23

52  
53  
54 24

1 Table 1: Characteristics of UBT devices used commonly for atonic PPH management in India

| UBT device        | Cost of device                                                      | Clinical effectiveness# | Advantages                                                                                                                                                      |
|-------------------|---------------------------------------------------------------------|-------------------------|-----------------------------------------------------------------------------------------------------------------------------------------------------------------|
| Condom-UBT        | USD 2<br>(INR 128) *<br>Assembly components commercially available  | 92.3%                   | Inexpensive,<br>Assembled using available resources,<br>Modified versions are used to assess blood loss post insertion                                          |
| ESM-UBT           | USD 6<br>(INR 397).[18,19]<br>Commercially not available at present | 95.3%**                 | Relatively inexpensive,<br>Specifically designed for PPH use,<br>All components needed for assembly available in a sterile pack,<br>US-FDA approved device      |
| Bakri Balloon UBT | USD 148<br>(INR 9,554).[20]<br>Commercially available at present    | 84.3%                   | Ready to use,<br>Specifically designed for PPH use,<br>Comes in a sterile pack,<br>Has drainage outlet to measure ongoing blood loss,<br>US-FDA approved device |

2 # - Estimated from literature review of 33 studies

3 \* - Calculated using health facility purchase lists

4 \*\* - Strength of evidence is limited, based on evidence available from three case series studies

5  
6 Under India's flagship *Pradhan Mantri Jan Arogya Yojana (PMJAY)* public health insurance scheme, a  
7 woman is entitled to cashless treatment package cost of USD 178 (INR 11,500) for high risk vaginal  
8 deliveries and all cesarean sections. Evidence suggests that despite improved maternal outcomes with  
9 publicly sponsored schemes, extent of out-of-pocket expenditure for institutional delivery remains high

1 especially with pregnancy complications.[21] At present, the existing packages do not cover the post-  
2 partum PPH complication and there is no documented health system cost available for management of this  
3 condition. The Ministry of Health and Family Welfare (MOHFW), Government of India is assessing the  
4 most cost-effective UBT device for atonic PPH management in the public health system given the emerging  
5 evidence for the relatively low cost ESM-UBT alternative.[22–24] The policy decision to make a UBT  
6 device available for PPH management across health facilities will have associated cost and health outcome  
7 implications. This study aimed to calculate public health system cost of atonic PPH management with SOC  
8 i.e. condom-UBT, recommended by the 2015 Indian guidelines for PPH management with similar  
9 projections for ESM-UBT and another globally used Bakri-UBT device.[14]

10

## 11 **METHODS**

12 This costing study was part of a Health Technology Assessment (HTA) project to evaluate the most cost-  
13 effective UBT device for atonic PPH management in India. An economic costing from the health system  
14 perspective using primary bottom-up micro-costing, data from HMIS and literature review for event  
15 probabilities were used to determine and compare unit, package and annual cost of atonic PPH management  
16 with three UBT devices namely condom-UBT, ESM-UBT and Bakri balloon UBT in public health facilities  
17 of Maharashtra, India. The study was approved by the NIRRH Ethics Committee for Clinical Studies  
18 (Approval number: D/ICEC/Sci-29/31/2018). State health department administrative approvals and consent  
19 from respective health facility authorities were obtained before undertaking the study.

### 20 **Patient and public involvement:**

21 There was no patient or public involvement in this study design, conduct or reporting of this study and  
22 hence no consent was obtained.

### 23 **Study settings:**



1  
2  
3 1 Maternal healthcare in the Indian public system is delivered through a three-tier system. The facilities in  
4  
5 2 this study were classified depending on availability of services for atonic PPH management. Primary level  
6  
7 3 care for PPH management comprises of Primary Health Centers (PHC) that are equipped with skilled birth  
8  
9 4 attendants and a medical officer. Secondary level is made by Community Health Centers (CHC) and Sub-  
10  
11 5 District Hospitals (SDH) that additionally are equipped with obstetrics-gynecology (OBGYN) specialist,  
12  
13 6 operation theater (OT) and facilities for blood transfusion. Tertiary level comprises of District Hospitals  
14  
15 7 (DH) and medical colleges having additional advanced intervention and ICU facilities.[25,26] The study  
16  
17 8 enrolled four public health facilities from the state of Maharashtra in India to ensure representation of all  
18  
19 9 three levels of care. A convenience sample of one PHC, SDH, DH, and a tertiary medical college from  
20  
21 10 Mumbai metropolitan region in Maharashtra was chosen for data collection.

#### 22 11 **Data collection:**

23  
24  
25  
26  
27 12 Cost data for one-year duration from April 2017 to March 2018 was collected by adapting a validated  
28  
29 13 standard tool developed for costing of health services in India.[27] Cost resources were broadly classified  
30  
31 14 into human resources, infrastructure, medical equipment, non-medical equipment, drugs, consumables, and  
32  
33 15 utilities like electricity, water and laundry. Consumption data for these resources were obtained from  
34  
35 16 available facility level and Hospital Management Information System (HMIS) sources. As PPH specific  
36  
37 17 patient indicators were unavailable in the HMIS, obstetric patient aggregate information such as number of  
38  
39 18 vaginal or cesarean section deliveries, number and type of obstetric surgeries, hysterectomies, number of  
40  
41 19 blood transfusions, in-patient admissions, emergency or obstetric ICU admissions as reported for chosen  
42  
43 20 facilities were obtained. Available electronic hospital records, written registers, building plan of health  
44  
45 21 facilities, salary slips, bills, statements of the accounts department were accessed to obtain facility level  
46  
47 22 resource utilization details. Floor area measurement and facility observations were undertaken to get details  
48  
49 23 on infrastructure of the IPD, LR, ICU, laboratory, pharmacy and administrative departments. For  
50  
51 24 unavailable patient level information specific to PPH, we relied on literature based event probability  
52  
53 25 estimates of atonic PPH incidence in Indian settings, clinical effectiveness of three UBT devices in  
54  
55  
56  
57  
58  
59  
60

1  
2  
3 1 controlling atonic PPH bleeding from a targeted literature review, probability of PPH related surgeries, its  
4  
5 2 success rate, morbidity and PPH mortality rates applied to the available facility level data to allocate  
6  
7 3 utilization of resources for costing.[9,10,28–30] Staff interviews were undertaken to assess proportion of  
8  
9 4 time spent on PPH specific activities. A total of 16 doctors, 26 nursing staff, 5 pharmacists and 11  
10  
11 5 administrative staff across chosen study facilities were interviewed. As an example, all doctors were asked  
12  
13 6 questions pertaining to the time spent on each patient in out-patient department (OPD), in-patient  
14  
15 7 department (IPD), surgery, teaching, documentation, administrative and other routine tasks but the time  
16  
17 8 spent by the senior-most doctor in performing an obstetric hysterectomy out of all routine tasks was used  
18  
19 9 in costing obstetric hysterectomy procedure for eligible PPH cases. Collected data from individual facilities  
20  
21 10 including staff interviews along with India specific PPH literature was used to determine unit, package and  
22  
23 11 annual costs for atonic PPH management components across all healthcare levels in Maharashtra, India.  
24  
25 12 Table 2 enlists the input parameters used to determine service utilization for PPH across chosen facilities.  
26  
27  
28  
29  
30  
31  
32  
33  
34  
35  
36  
37  
38  
39  
40  
41  
42  
43  
44  
45  
46  
47  
48  
49  
50  
51  
52  
53  
54  
55  
56  
57  
58  
59  
60

1 Table 2: Parameters used to determine service utilization for atonic PPH management in Maharashtra based  
 2 on event probability from Indian context literature

| Parameter                                                                                                              | Value in cost analysis*                    | Source                                                   |
|------------------------------------------------------------------------------------------------------------------------|--------------------------------------------|----------------------------------------------------------|
| Annual number of deliveries at primary level facility (1 PHC)                                                          | Vaginal – 494                              | Facility HMIS 2017-18                                    |
| Annual number of deliveries at secondary level facility (1 SDH)                                                        | Vaginal – 1526<br>Caesarean section – 330  | Facility HMIS 2017-18                                    |
| Annual number of deliveries at tertiary level facilities (1 DH & 1 Medical college)                                    | Vaginal – 5188<br>Caesarean section – 2186 | Facility HMIS 2017-18                                    |
| Annual number of institutional deliveries in public health facilities of Maharashtra, India (Includes home deliveries) | 9,69,264                                   | HMIS 2017-18                                             |
| Incidence of PPH in vaginal deliveries in India                                                                        | 3%                                         | [9,31]                                                   |
| Incidence of PPH in cesarean section deliveries, India                                                                 | 6%                                         | [9,31]                                                   |
| Probability of PPH due to uterine atony in India                                                                       | 0.80                                       | [10]                                                     |
| Probability of atonic PPH controlled with medical management                                                           | 0.90                                       | [30]                                                     |
| Annual number of atonic PPH cases eligible for UBT device insertion in Maharashtra, India                              | 2,791                                      | Calculation using India specific PPH event probabilities |
| Probability of stepwise devascularization surgical procedures for uncontrolled cases after UBT                         | 0.85                                       | [30]                                                     |
| Probability of obstetric hysterectomy surgery for uncontrolled cases after UBT                                         | 0.15                                       | [30]                                                     |

1  
2  
3 1  
4  
56 2 **Data analysis:**  
7

8  
9 3 To determine PPH events occurring at facility level, PPH incidence rates in vaginal and cesarean section  
10 4 deliveries were applied to facility reported deliveries to determine number of cases occurring annually.  
11  
12 5 Proportion of atonic PPH cases uncontrolled after medical management determined the number of  
13 6 beneficiaries eligible for UBT device insertion after failed medical management. Clinical effectiveness of  
14  
15 7 each individual UBT device derived from literature review determined the requirement of subsequent  
16  
17 8 utilization of surgical resources with each individual UBT expected to take place at each healthcare level.  
18  
19 9 (Supplementary material 1)  
20  
21  
22

23  
24 10 For cost analysis, resources were classified into capital and recurrent items. Capital resource items were  
25  
26 11 annualized using the India recommended 3% discount rate and factoring in life expectancy and annual  
27  
28 12 maintenance rate of the items.[32] Cost resources were apportioned using standard methods based on shared  
29  
30 13 or exclusive nature of utilization and classification into capital or recurrent items.[33] Human resource  
31  
32 14 salaries were apportioned based on the time spent for an activity out of all the respective services provided.  
33  
34 15 Space was apportioned based on proportion of time and quantity spent on different activities in a given  
35  
36 16 area. Drugs and consumables were apportioned as a proportion of utilization for PPH out of utilization for  
37  
38 17 all healthcare services. Medical and non-medical equipment were first annualized and then apportioned as  
39  
40 18 the proportion of time used specifically for the given PPH event out of all activities. Utilities such as  
41  
42 19 water/electricity were apportioned as the proportion of floor area occupied for a particular service. The  
43  
44 20 apportioning factors were determined from staff interviews, available facility or HMIS data and literature.  
45  
46 21 Monetary value of cost resources was obtained from the individual facility purchase lists. Data was  
47  
48 22 analyzed using Microsoft Excel 2016. Worksheets were developed for cost calculation of each component  
49  
50 23 at each facility followed by weighted aggregation of costs to the level of care individually for each UBT.  
51  
52 24 For example, unit condom UBT insertion cost at DH and medical college was aggregated to get a unit  
53  
54 25 condom UBT insertion cost for tertiary level. All costs are presented in United States Dollars (USD) and  
55  
56  
57  
58  
59  
60

1  
2  
3 1 Indian National Rupee (INR) currency. A conversion rate of 1 USD = 64.5 INR for the year 2017-18 was  
4  
5 2 used.[34]  
6  
7

### 8 3 Unit costs 9

10 4 Unit costs were calculated for each component of atonic PPH management expected at respective healthcare  
11  
12 5 level. The components included cost of medical management for atonic PPH, UBT insertion for refractory  
13  
14 6 cases, devascularization surgery, hysterectomy, IPD admission, ICU admission and cost of patient referral  
15  
16 7 at respective levels. Number of deliveries and obstetric surgeries from facility and HMIS data, staff  
17  
18 8 interviews and literature evidence determined denominators like number of atonic PPH cases at the  
19  
20 9 healthcare level, number of UBT eligible beneficiaries, number of referrals, number of consequential  
21  
22 10 conservative or obstetric hysterectomy surgeries at the facility level. This with collected cost data was used  
23  
24 11 to compute per beneficiary unit cost for the identified components of atonic PPH management at respective  
25  
26 12 healthcare level. Unit cost of UBT insertion included the cost of UBT device. Unit cost of medical  
27  
28 13 management, referral and IPD admission were expected to remain unaffected irrespective of the type of the  
29  
30 14 UBT device used. For these services, costs were calculated only for SOC i.e. management with condom-  
31  
32 15 UBT device.  
33  
34  
35  
36

### 37 16 Package costs 38

39 17 To account for treatment combinations used in management of atonic PPH, treatment package costs were  
40  
41 18 determined. For a certain treatment, package cost was calculated by adding unit cost associated with all  
42  
43 19 treatment components for management at respective healthcare level. For all patients at primary and  
44  
45 20 secondary care requiring transport, referral costs were added to get package costs.  
46  
47  
48

### 49 21 Annual costs 50

51 22 Unit and package cost calculation was followed by annual health system cost estimation for an annual  
52  
53 23 cohort of women in Maharashtra experiencing atonic PPH after delivering in public healthcare facilities.  
54  
55 24 Number of deliveries occurring across the three respective public healthcare levels in Maharashtra were  
56  
57  
58  
59  
60

1 combined with respective PPH service utilization units to get pooled annual cost for a given service. Annual  
2 health system cost was then estimated by combining annual health system cost of medical management,  
3 further course of interventions using UBT device in uncontrolled cases and training cost for UBT. Unit cost  
4 for every treatment component at each facility was first aggregated to primary, secondary and tertiary level  
5 and then applied to the annual eligible population cohort in Maharashtra to estimate annual costs with each  
6 UBT device.

7 Certain methodological assumptions were made during cost analysis. It was assumed that for a particular  
8 UBT device, all eligible atonic PPH cases would receive only that particular UBT across all facilities. It  
9 was assumed that at primary level, all women after medical management or UBT insertion would  
10 immediately be referred to secondary care. Unit calculated cost of per day IPD or ICU admission for patients  
11 at chosen facilities were apportioned to literature based atonic PPH length of stay to estimate IPD and ICU  
12 costs for atonic PPH management.[35–37] Cost of blood transfusion and other resuscitation measures were  
13 incorporated in unit costs throughout management and are not calculated separately. Training costs were  
14 estimated for one day training of healthcare providers.[38] Due to time and resource limitation for primary  
15 estimation of PPH referral costs, an inflation adjusted cost of USD 15.5 (INR 1,001) per case was used  
16 from a published Indian primary economic costing study that calculated public health system cost of  
17 transportation for institutional delivery services in three districts of an Indian state.[39] B-Lynch suturing  
18 and stepwise devascularization surgery in this study were considered as a single unit for cost calculation.

19 Probabilistic sensitivity analysis was used to address joint uncertainty effect of input parameters on costs.  
20 A beta distribution for probabilities and proportions, a gamma distribution for cost and resource use was  
21 assigned for parameter variation on both sides. As drugs and consumables are procured by the government  
22 at a negotiated price whereas market prices show variation on the higher side, these were varied by 50%  
23 and 100% on lower and upper limit respectively. UBT device price was assumed to vary by 50% on both  
24 sides. Remaining parameters such as salaries, rental prices, medical and non-medical equipment, utilities  
25 and utilization of services were varied by 25%.[40] Monte Carlo simulations were run to obtain 1000 unit

1  
2  
3 1 cost estimates. These estimates were used to determine 95% confidence interval (CI) limits for all reported  
4  
5 2 costs.  
6  
7  
8  
9

## 10 4 **RESULTS**

11  
12  
13 5 The chosen sample of four public health facilities from Maharashtra reported 7,208 vaginal and 2,516  
14  
15 6 cesarean section deliveries in the year 2017-18. Of the 9,724 total deliveries, 293 women were expected to  
16  
17 7 experience atonic PPH. Twenty-nine out of 293 cases would remain uncontrolled after medical management,  
18  
19 8 thus becoming eligible for UBT device insertion. Further depending on clinical effectiveness of individual  
20  
21 9 UBT device in controlling bleeding, remaining cases undergo surgical intervention depending on  
22  
23 10 infrastructure and resource availability at respective clinical setting.  
24  
25  
26

### 27 11 **Unit costs:**

28  
29  
30 12 Medical management of atonic PPH cases costs the health system USD 0.7 (INR 42), USD 5 (INR 322)  
31  
32 13 and USD 9.4 (INR 609) per patient at primary, secondary and tertiary levels respectively. For uncontrolled  
33  
34 14 cases requiring further intervention, condom-UBT (SOC) insertion costs USD 2.5 (INR 160), USD 5.3  
35  
36 15 (INR 339) and USD 6.5 (INR 422) at the three respective levels. Devascularization group of surgery for  
37  
38 16 uncontrolled cases after condom-UBT insertion costs the health system USD 75.4 (INR 4864) per case at  
39  
40 17 secondary and USD 53.0 (INR 3,419) per case at tertiary level. Similarly, hysterectomy procedure costs  
41  
42 18 USD 120.6 (INR 7,782) per case at secondary and USD 84.8 (INR 5,471) at tertiary level. Table 3 provides  
43  
44 19 the health system unit costs with condom-UBT, ESM-UBT and Bakri-UBT. IPD admission for an atonic  
45  
46 20 PPH case costs the health system USD 27.5 (INR 1,776) per patient at secondary and USD 28.0 (INR 1,806)  
47  
48 21 per patient at tertiary level. ICU admission at tertiary facility costs the health system USD 76.0 (INR 4,902)  
49  
50 22 per patient getting admitted for atonic PPH management. One-time training of medical officers and  
51  
52 23 OBGYN specialists across public health facilities of Maharashtra costs USD 12.1 (INR 778) per eligible  
53  
54 24 case of UBT device insertion.  
55  
56  
57  
58  
59  
60

1 Table 3: Unit costs for atonic PPH management components across public health facility levels in  
 2 Maharashtra, India [1 USD = 64.5 INR]

|                                                                        | Medical management | UBT insertion          | Devascularization    | Hysterectomy          | Inpatient Admission | ICU admission        |
|------------------------------------------------------------------------|--------------------|------------------------|----------------------|-----------------------|---------------------|----------------------|
| Per patient unit cost with Condom-UBT in USD (95% Confidence interval) |                    |                        |                      |                       |                     |                      |
| Primary                                                                | 0.7<br>(0.4-0.9)   | 2.5<br>(1.5-3.5)       | NA                   | NA                    | NA                  | NA                   |
| Secondary                                                              | 5.0<br>(3.5-6.6)   | 5.3<br>(4.1-6.5)       | 75.4<br>(49.4-104.4) | 120.6<br>(77.9-168.2) | 27.5<br>(16.8-39.5) | NA                   |
| Tertiary                                                               | 9.4<br>(6.7-12.6)  | 6.5<br>(5.3-7.9)       | 53.0<br>(41.9-64.4)  | 84.8<br>(66.3-104.4)  | 28.0<br>(20.7-35.9) | 75.9<br>(50.3-104.6) |
| Per patient unit cost with ESM-UBT in USD (95% Confidence interval)    |                    |                        |                      |                       |                     |                      |
| Primary                                                                | 0.7<br>(0.4-0.9)   | 6.7<br>(3.6-9.9)       | NA                   | NA                    | NA                  | NA                   |
| Secondary                                                              | 5.0<br>(3.5-6.6)   | 8.8<br>(5.9-11.6)      | 56.9<br>(37.1-79.0)  | 119.9<br>(79.3-162.7) | 27.5<br>(16.8-39.5) | NA                   |
| Tertiary                                                               | 9.4<br>(6.7-12.6)  | 10.4<br>(8.5-12.5)     | 51.7<br>(40.6-63.7)  | 86.5<br>(68.0-107.1)  | 28.0<br>(20.7-35.9) | 75.9<br>(50.3-104.6) |
| Per patient unit cost with Bakri-UBT in USD (95% Confidence interval)  |                    |                        |                      |                       |                     |                      |
| Primary                                                                | 0.7<br>(0.4-0.9)   | 148.6<br>(74.3-219.0)  | NA                   | NA                    | NA                  | NA                   |
| Secondary                                                              | 5.0<br>(3.5-6.6)   | 151.1<br>(88.0-214.8)  | 76.8<br>(51.2-103.9) | 119.7<br>(80.1-165.4) | 27.5<br>(16.8-39.5) | NA                   |
| Tertiary                                                               | 9.4<br>(6.7-12.6)  | 153.1<br>(113.0-191.8) | 53.0<br>(41.6-64.7)  | 84.8<br>(67.2-103.7)  | 28.0<br>(20.7-35.9) | 75.9<br>(50.3-104.6) |



1  
2  
3 1  
4  
5  
6 2 **Package cost:**  
7  
8  
9 3 Of the eligible cases, condom-UBT successfully controls 92.3% of the cases after device insertion and  
10 4 ongoing medical and resuscitation measures. This combination treatment costs the health system a total of  
11 5 USD 46.2 (INR 2,979), USD 37.8 (INR 2,437) and USD 44.0 (INR 2,838) at three respective levels. This  
12 6 treatment package comprises costs of medical management, UBT insertion, IPD admission and additional  
13 7 referral cost for primary care patients. Treatment package cost of control with devascularization surgery  
14 8 after condom-UBT insertion and medical treatment costs the health system a total of USD 113.2 (INR  
15 9 7,301) and USD 97.0 (INR 6,256) per patient at secondary and tertiary levels respectively. Similarly, a  
16 10 direct hysterectomy for uncontrolled atonic PPH after UBT insertion costs USD 158.4 (INR 10,218) and  
17 11 USD 128.8 (INR 8,308) at secondary and tertiary levels respectively. Less than 4% of the uncontrolled  
18 12 atonic PPH cases with condom-UBT insertion are expected to require ICU facility for atonic PPH  
19 13 management. Health system package costs for such treatment combinations can be derived from the given  
20 14 unit cost table. Alternatively, if ESM or Bakri-UBT device is used in controlling atonic PPH, package cost  
21 15 varies on account of device effectiveness and associated resource use. Table 4 lists treatment package cost  
22 16 estimates for atonic PPH management with three UBT devices.  
23  
24  
25  
26  
27  
28  
29  
30  
31  
32  
33  
34  
35  
36  
37  
38  
39 17  
40  
41  
42 18  
43  
44  
45 19  
46  
47 20  
48  
49  
50 21  
51  
52  
53 22  
54  
55  
56 23  
57  
58  
59  
60

1  
2  
3 Table 4: Treatment package cost for atonic PPH management across public healthcare levels in  
4  
5  
6 2 Maharashtra, India [1 USD = 64.5 INR] (95% Confidence interval)  
7

|                                                                                                                             | Condom UBT             | ESM UBT                | Bakri UBT              |
|-----------------------------------------------------------------------------------------------------------------------------|------------------------|------------------------|------------------------|
| Package cost for atonic PPH controlled after UBT insertion in USD<br>(95% Confidence interval)                              |                        |                        |                        |
| Primary                                                                                                                     | 46.2<br>(34.9-59.1)    | 50.4<br>(38.5-63.8)    | 192.3<br>(153.8-230.8) |
| Secondary                                                                                                                   | 37.8<br>(28.5-48.3)    | 41.3<br>(31.9-52.0)    | 184.1<br>(147.0-222.4) |
| Tertiary                                                                                                                    | 43.9<br>(35.4-53.3)    | 47.9<br>(39.6-57.0)    | 190.5<br>(149.9-233.2) |
| Package cost for atonic PPH controlled with devascularization surgery after UBT failure in USD<br>(95% Confidence interval) |                        |                        |                        |
| Secondary                                                                                                                   | 113.2<br>(103.2-123.8) | 98.2<br>(88.5-108.7)   | 260.9<br>(218.6-304.2) |
| Tertiary                                                                                                                    | 96.9<br>(88.7-106.3)   | 99.6<br>(91.4-109.3)   | 243.5<br>(202.2-286.9) |
| Package cost for atonic PPH controlled with direct hysterectomy after UBT failure in USD<br>(95% Confidence interval)       |                        |                        |                        |
| Secondary                                                                                                                   | 158.4<br>(149.6-168.9) | 161.1<br>(152.1-171.7) | 303.8<br>(256.0-355.6) |
| Tertiary                                                                                                                    | 128.8<br>(120.5-138.6) | 134.4<br>(126.2-144.0) | 275.3<br>(231.2-319.1) |

3

4

1  
2  
3 **1 Annual costs:**  
4  
5

6 2 Annual cost to the public health system was estimated for managing 27,915 women experiencing atonic  
7  
8 3 PPH annually out of the 969,264 deliveries reported by the state of Maharashtra in the year 2017-18.[41]  
9  
10 4 The estimated annual cost of medical management for atonic PPH was USD 1,032,647 (INR 6,66,05,750)  
11  
12 5 or USD 36.9 (INR 2,386) per atonic PPH patient. Additionally, 2,791 women were estimated to require  
13  
14 6 UBT intervention followed by devascularization surgery, hysterectomy or ICU facility for uncontrolled  
15  
16 7 cases. The annual cost of managing these uncontrolled cases in public health facilities of Maharashtra, India  
17  
18 8 is USD 193,963 (INR 1,25,10,610) with condom-UBT, USD 188,090 (INR 1,21,31,800) with ESM-UBT  
19  
20 9 and USD 620,297 (INR 4,00,09,169) with Bakri-UBT when used for uncontrolled atonic PPH cases. This  
21  
22 10 corresponds to a per eligible beneficiary cost of USD 69.5 (INR 4,482) for control with condom-UBT and  
23  
24 11 subsequent interventions, USD 67.4 (INR 4,346) for ESM-UBT and USD 222.2 (INR 14,333) for Bakri-  
25  
26 12 UBT respectively. Overall, the health system incurs a per atonic PPH patient treatment cost of USD 43.9  
27  
28 13 (INR 2,834) with condom-UBT, USD 43.7 (INR 2,820) with ESM-UBT and USD 59.2 (INR 3,819) per  
29  
30 14 case with Bakri-UBT if made available for atonic PPH management in Maharashtra, India. Table 5  
31  
32 15 describes the annual health system cost of atonic PPH management in Maharashtra, India.  
33  
34  
35  
36  
37  
38  
39  
40  
41  
42  
43  
44  
45  
46  
47  
48  
49  
50  
51  
52  
53  
54  
55  
56  
57  
58  
59  
60

1 Table 5: Annual public health system cost of managing atonic PPH using three UBT devices in  
 2 Maharashtra, India [1 USD = 64.5 INR] (95% Confidence interval)

| Cost center                                                                                          | Condom-UBT<br>USD (95% CI)      | ESM-UBT<br>USD (95% CI)         | Bakri-UBT<br>USD (95% CI)        |
|------------------------------------------------------------------------------------------------------|---------------------------------|---------------------------------|----------------------------------|
| Annual atonic PPH medical management cost (a)                                                        | 1,032,647<br>(688893 – 1375716) |                                 |                                  |
| Annual UBT training cost (b)                                                                         | 34,109<br>(25817 – 42579)       |                                 |                                  |
| Annual cost for uncontrolled atonic PPH cases managed with UBT device and surgical interventions (c) | 193,963<br>(152,772 – 232,481)  | 188,090<br>(150393 – 226901)    | 620,297<br>(386981 – 857415)     |
| Total annual cost of atonic PPH management (a + b + c)                                               | 1,226,610<br>(870250 – 1581596) | 1,220,737<br>(876187 – 1566385) | 1,652,944<br>(1224827 – 2061670) |
| Annual UBT device cost                                                                               | 5,540<br>(2362 – 8664)          | 17,182<br>(7324 – 26770)        | 413,485<br>(180,326 – 652,695)   |
| Per patient cost of medical management for atonic PPH                                                | 36.9<br>(29-45)                 |                                 |                                  |
| Per patient cost of managing uncontrolled atonic PPH cases with UBT and surgical interventions       | 69.5<br>(47 – 94)               | 67.4<br>(47 – 88)               | 222.2<br>(145 – 299)             |
| Per patient health system cost of atonic PPH management                                              | 43.9<br>(36 – 53)               | 43.7<br>(35 – 52)               | 59.2<br>(46 – 73)                |

3

1  
2  
3 1  
4  
5  
6 2

## DISCUSSION

3 To our knowledge, this is the first study comprehensively assessing public health system costs associated  
4 with atonic PPH management in India. A study conducted in Myanmar at a 25 bedded hospital reported  
5 cost of PPH management along with other obstetric complications.[42] Similarly, an Egypt study reported  
6 estimates of direct health system costs for different procedures used in PPH management in two district  
7 hospitals.[43] Our study specifically estimates health system cost of managing atonic PPH across healthcare  
8 levels in the Indian public health system using primary cost data. This paper focuses on estimating the cost  
9 of using different uterine balloon tamponade devices given their varying reported clinical effectiveness in  
10 controlling atonic PPH bleeding. Additionally, we have undertaken costing of medical management and  
11 surgical interventions subsequent to failed UBT treatment across public healthcare levels of India.

12 Our analysis reported a total cost of USD 43.9 (95% CI 36-53) per atonic PPH patient with condom-UBT,  
13 USD 43.7 (95% CI 35-52) with ESM-UBT and USD 59.2 (95% CI 46-73) with Bakri-UBT use in  
14 Maharashtra's public health system for the year 2017-18. The study from Myanmar reported an inflation  
15 adjusted unit cost of USD 28 ( $\pm 1.61$ ) per case for managing PPH in their hospital study setting.[44] The  
16 Egypt study reported an adjusted treatment cost of USD 110 per case for PPH but reported use of UBT  
17 intervention in 3.9% cases as compared to 9.9% in our study. As primary data was not available, the  
18 assumption that all those needing UBT intervention would receive it may be one of the reasons for lower  
19 unit costs in our study as UBT intervention would reduce subsequent surgical interventions. Neither of the  
20 two studies reported UBT intervention costs specifically.

21 The unit cost of medical management for an atonic PPH case in our study was USD 36.9 (INR 2,386). Unit  
22 cost of UBT device insertion increased gradually with higher facility level and was dominated by the cost  
23 of UBT device itself. Treatment package costs for UBT insertion at primary level included referral cost and  
24 hence reported higher costs as compared to secondary or tertiary level. Unit and package costs for surgical

1 intervention subsequent to UBT failure was found to be higher at secondary level as compared to tertiary  
2 level in our study. Tertiary level hysterectomy cost at USD 84.8 (INR 5,471) per case in our study is in the  
3 similar range as reported by another Indian study at an adjusted cost of USD 95.7 (INR 6174) for a district  
4 hospital.[45] Likewise, stepwise devascularization surgery in the Egypt study reported an adjusted cost of  
5 USD 62 per case is in the similar range to those reported in our findings. Unit and package surgical costs  
6 in our study also varied depending on clinical effectiveness of the UBT device affecting consumption of  
7 resources. Cost of condom-UBT device in Indian public health facilities was USD 1.9 (INR 128), one-third  
8 the price of ESM-UBT device. Bakri balloon at a market price of USD 148 (INR 9554) in India, costs  
9 significantly higher in comparison to the other two devices. Bakri-UBT at a higher price and lower reported  
10 clinical effectiveness in controlling atonic PPH, accounted for higher unfavorable unit and package costs  
11 in our analysis. ESM-UBT reported a marginally higher clinical effectiveness but had a three-time higher  
12 device cost as compared to condom-UBT. The unit cost however for both condom and ESM-UBT was  
13 similar at USD 43.9 (INR 2,834) and USD 43.7 (INR 2820).

14 Cost of medical management for atonic PPH across healthcare levels in this study constitutes a major  
15 component of the annual costs (84.2% for Condom-UBT, 84.6% for ESM-UBT and 62.5% for Bakri-UBT).  
16 This is expected as majority patients are controlled with uterotonics and supportive measures. Remaining  
17 portion of annual costs are accounted by UBT and subsequent interventions for uncontrolled cases (15.8%  
18 for condom-UBT, 15.4% for ESM-UBT and 37.5% for Bakri-UBT). Both condom and ESM-UBT have  
19 lower unit, package and annual costs as compared to Bakri-UBT. However, the strength of clinical  
20 effectiveness evidence available for ESM-UBT at the time of this study was limited to a few case series  
21 studies reporting survival rates.[19,22,23]. Cost implication of using ESM-UBT device would vary if higher  
22 quality of clinical effectiveness evidence and procurement cost of equipping all Indian public health  
23 facilities with the device is available. Cost of UBT device accounted to 0.5% of the annual health system  
24 costs with condom-UBT, 1.4% for ESM-UBT and 25% for Bakri-UBT respectively.

1  
2  
3 1 The state of Maharashtra in the year 2017-18 spent an estimated USD 1,226,610 (INR 7,91,16,359) by  
4  
5 2 catering to all atonic PPH cases of public health facilities with condom-UBT intervention as per the  
6  
7 3 treatment guidelines. Alternatively, if ESM-UBT or Bakri Balloon was available, the state would spend  
8  
9 4 USD 1,220,737 (INR 7,87,37,549) or USD 1,652,944 (INR 10,66,14,919) respectively. Atonic PPH  
10  
11 5 management with condom-UBT in Maharashtra thus accounted to 3.8% of the annual state spending on  
12  
13 6 reproductive and child health (RCH) activities in the year 2017-18.[46,47] With ESM or Bakri-UBT in  
14  
15 7 place, atonic PPH management would account to 3.8% or 5.2% of the annual RCH spending.

16  
17  
18 8 This study empirically derived costs of atonic PPH management across public healthcare levels for a state  
19  
20 9 in India. The WHO guideline development group has identified use of uterine balloon tamponade in PPH  
21  
22 10 as a research priority.[48] Our study provides economic evidence for equipping health systems with the  
23  
24 11 choice of a clinically effective UBT intervention that is affordable and suitable for low resource settings  
25  
26 12 like India. Findings of this study can be used to optimize efficiency by improving financial allocation within  
27  
28 13 the health system. Under the revised *Janani Shishu Suraksha Karyakaram* (JSSK) scheme in India,  
29  
30 14 pregnant women accessing public facilities are entitled to free treatment for childbirth and pregnancy  
31  
32 15 complications.[49] Implementation under the PMJAY scheme has revised high risk and caesarean section  
33  
34 16 delivery package costs to USD 178 (INR 11,500). This package is inclusive of drugs, diagnostics,  
35  
36 17 consultations, procedures, stay and food for the patient availing care.[50] The results from our study can be  
37  
38 18 used to address package costs for the post-partum PPH complication across different publicly financed  
39  
40 19 health schemes to avoid any financial burden to the beneficiaries as reported with institutional deliveries in  
41  
42 20 India.[21]

#### 43 44 45 46 47 21 **Limitations:**

48  
49 22 The study bases its cost findings from one region of Maharashtra by collecting data from sample facilities  
50  
51 23 across healthcare levels. Given the differences within districts across the state, provisioning and utilization  
52  
53 24 of healthcare services vary on account of socio-economical, epidemiological and other contextual factors.  
54  
55 25 Although we have undertaken an uncertainty analysis to address these factors to an extent, generalizability

1  
2  
3 1 of the study results across states of India may be difficult. For analysis, it was assumed that all atonic PPH  
4  
5 2 cases requiring UBT intervention will receive it and a uniform UBT device would be available across all  
6  
7 3 facilities. However, in practice this might differ resulting in deviation of cost estimates from those reported.  
8  
9 4 Facility level disaggregated HMIS data on PPH and corresponding service utilization was not available, so  
10  
11 5 we had to rely on literature-based probabilities to derive PPH service utilization for costing.  
12  
13

## 14 6 **CONCLUSION**

15  
16  
17 7 The study provides health system cost of managing atonic PPH complication in Indian public health  
18  
19 8 settings. Policy makers can use these findings to include the PPH clinical condition to treatment benefit  
20  
21 9 packages under publicly financed health schemes and to inform budgetary allocations in order to equip the  
22  
23 10 Indian health system with a suitable UBT choice. Economic evaluation studies can use this evidence to  
24  
25 11 determine the most cost-effective UBT choice in Indian settings. In addition to equipping facilities and  
26  
27 12 supply lines with the right commodities, programs must optimize performance of the health providers and  
28  
29 13 ensure efficient referral systems in place to save a woman's life.  
30  
31  
32  
33  
34  
35  
36  
37  
38  
39  
40  
41  
42  
43  
44  
45  
46  
47  
48  
49  
50  
51  
52  
53  
54  
55  
56  
57  
58  
59  
60



## 1 **Acknowledgements**

2 We acknowledge the support provided by the Department of Health Research (DHR), MOHFW,  
3 Government of India. We are grateful to Dr. Dinesh Baswal (Deputy Commissioner Maternal Health  
4 Division, MOHFW, India) for suggesting the topic to HTAIn and Dr. Smita Mahale (Director, NIRRH-  
5 ICMR, Mumbai, India) for her encouragement and support. We acknowledge the technical support  
6 provided by HTAIn, DHR and the project staff at the institute. We are grateful for the inputs provided by  
7 experts Dr. Niranjana Maydeo (Professor and Head, Department of Obstetrics and Gynecology, King  
8 Edward Memorial Hospital, Mumbai, India), Mr. Pankaj Bahuguna (Economic Evaluation Specialist,  
9 School of Public Health, PGIMER), Dr. Anushree Patil (Scientist E, Clinical Research, NIRRH-ICMR,  
10 Mumbai, India), Dr. Amita Pandey (Professor, Department of Obstetrics and Gynecology, King George's  
11 Medical University, Lucknow, India), Dr. Vanita Suri (Professor and Head, Department of Obstetrics and  
12 Gynecology, Postgraduate Institute of Medical Education and Research, Chandigarh, India) and Dr. Amit  
13 Patel (Program Director, Jivdaya Foundation, Texas, United States of America)

## 14 **Author Contributions**

15 BJ, SS and KM were responsible for conceptualization and design of the study. KM and HC undertook data  
16 collection. SS and KM analyzed the data. BJ checked the analysis and edited the manuscript. SS was  
17 responsible for the first draft and all authors contributed to further revisions. All authors read and approved  
18 the final manuscript.

## 19 **Funding statement**

20 This work was supported by HTAIn, Department of Health Research, Ministry of Health and Family  
21 Welfare, Government of India grant number T.11011/02/2017-HR

## 22 **Competing interests**

23 None declared

1  
2  
3  
4  
5  
6  
7  
8  
9  
10  
11  
12  
13  
14  
15  
16  
17  
18  
19  
20  
21  
22  
23  
24  
25  
26  
27  
28  
29  
30  
31  
32  
33  
34  
35  
36  
37  
38  
39  
40  
41  
42  
43  
44  
45  
46  
47  
48  
49  
50  
51  
52  
53  
54  
55  
56  
57  
58  
59  
60

1 **Patient consent**

2 Not required

3 **Data sharing statement**

4 All unpublished data are available upon reasonable request to the corresponding author BJ through E-mail

5

For peer review only

## REFERENCES

- 1  
2  
3  
4  
5  
6  
7 1 1 Onarheim KH, Iversen JH, Bloom DE. Economic benefits of investing in women's health: A  
8 2 systematic review. *PLoS One*. 2016;**11**:1–23. doi:10.1371/journal.pone.0150120
- 9 3 2 Amiri A, Gerdtham U. Impact of maternal and child health on economic growth: New evidence  
10 4 based granger causality and DEA analysis. *Partnersh Matern Newborn Child Heal (PMNCH),*  
11 5 *World Heal Organ* 2013;:1–  
12 6 30.[http://www.who.int/pmnch/topics/part\\_publications/201303\\_Econ\\_benefits\\_econometric\\_study](http://www.who.int/pmnch/topics/part_publications/201303_Econ_benefits_econometric_study.pdf)  
13 7 .pdf
- 14 8 3 Registrar General of India. SPECIAL BULLETIN ON MATERNAL MORTALITY IN INDIA  
15 9 2015-17 SAMPLE REGISTRATION SYSTEM OFFICE OF REGISTRAR GENERAL, INDIA.  
16 10 2019. <http://www.censusindia.gov.in> (accessed 15 Apr 2020).
- 17 11 4 Singh PK. India has achieved groundbreaking success in reducing maternal mortality. WHO Reg.  
18 12 Off. South-East Asia. 2016;:2016.[https://www.who.int/southeastasia/news/detail/10-06-2018-](https://www.who.int/southeastasia/news/detail/10-06-2018-india-has-achieved-groundbreaking-success-in-reducing-maternal-mortality)  
19 13 [india-has-achieved-groundbreaking-success-in-reducing-maternal-mortality](https://www.who.int/southeastasia/news/detail/10-06-2018-india-has-achieved-groundbreaking-success-in-reducing-maternal-mortality) (accessed 15 Apr  
20 14 2020).
- 21 15 5 DGHS. National Health Profile 2018 13 th Issue. 2018. [www.who.int/classifications](http://www.who.int/classifications)
- 22 16 6 The World Bank. Number of maternal deaths | Data.  
23 17 2015.[https://data.worldbank.org/indicator/SH.MMR.DTHS?most\\_recent\\_value\\_desc=true](https://data.worldbank.org/indicator/SH.MMR.DTHS?most_recent_value_desc=true)  
24 18 (accessed 15 Apr 2020).
- 25 19 7 Welfare F. Health and Family Welfare Statistics in India 2017. 2017.
- 26 20 8 Say L, Chou D, Gemmill A, *et al*. Global causes of maternal death: A WHO systematic analysis.  
27 21 *Lancet Glob Heal* 2014;**2**:323–33. doi:10.1016/S2214-109X(14)70227-X
- 28 22 9 Rastogi A, Zahid. Postpartum haemorrhage | National Health Portal Of India. Natl. Heal. Portal  
29 23 India. 2017.<https://www.nhp.gov.in/disease/gynaecology-and-obstetrics/postpartum-haemorrhage>  
30 24 (accessed 15 Jun 2020).
- 31 25 10 Dutta D. *Textbook of Obstetrics*. 2015.
- 32 26 11 Guidelines- MH :: National Health Mission.  
33 27 <https://nhm.gov.in/index1.php?lang=1&level=3&sublinkid=839&lid=377> (accessed 8 Jun 2020).
- 34 28 12 Dept. of Reproductive Health and Research W. WHO recommendations for the prevention and  
35 29 treatment of postpartum haemorrhage. 2012. [www.who.int/maternal\\_child\\_adolescent](http://www.who.int/maternal_child_adolescent) (accessed 5  
36 30 Feb 2020).
- 37 31 13 Suarez S, Conde-Agudelo A, Borovac-Pinheiro A, *et al*. Uterine balloon tamponade for the  
38 32 treatment of postpartum hemorrhage: a systematic review and meta-analysis. *Am J Obstet Gynecol*  
39 33 Published Online First: 2020. doi:10.1016/j.ajog.2019.11.1287
- 40 34 14 Division MH, Welfare F. Guidance Note on Prevention and Management of Postpartum  
41 35 Haemorrhage. 2015;:1–28.
- 42 36 15 Maternal Health — Jiv Daya Foundation. <https://www.jivdayafound.org/maternal-health> (accessed  
43 37 3 Jun 2020).
- 44 38 16 MGIMS, Govt of India, NHSRC and Harvard discuss PPH management.

1  
2  
3  
4  
5  
6  
7  
8  
9  
10  
11  
12  
13  
14  
15  
16  
17  
18  
19  
20  
21  
22  
23  
24  
25  
26  
27  
28  
29  
30  
31  
32  
33  
34  
35  
36  
37  
38  
39  
40  
41  
42  
43  
44  
45  
46  
47  
48  
49  
50  
51  
52  
53  
54  
55  
56  
57  
58  
59  
60

- 1 <https://www.mgims.ac.in/index.php/component/easyblog/392-govt-of-india-discusses-the-management-of-pph-at-mgims?Itemid=1> (accessed 3 Jun 2020).
- 2
- 3 17 'Harvard' helps State's 11 medical colleges to reduce maternal deaths due to PPH - The Hitavada.
- 4 2 <https://www.thehitavada.com/Encyc/2020/3/3/-Harvard-helps-State-s-11-medical-colleges-to-reduce-maternal-deaths-due-to-PPH.html> (accessed 3 Jun 2020).
- 5
- 6 18 Massachusetts General Hospital. Every Second Matters for Mothers and Babies - Uterine Balloon
- 7 7 Tamponade for Postpartum Hemorrhage. *Massachusetts Gen. Hosp. Emerg. Med.* 2018. <https://www.massgeneral.org/emergency-medicine/global-health/initiatives-and-programs/every-second-matters-for-mothers-and-babies-uterine-balloon-tamponade-for-postpartum-hemorrhage> (accessed 20 Jul 2020).
- 8 8
- 9 9
- 10 10
- 11 11 19 Burke TF, Ahn R, Nelson BD, *et al.* A postpartum haemorrhage package with condom uterine
- 12 12 balloon tamponade: a prospective multi-centre case series in Kenya, Sierra Leone, Senegal, and
- 13 13 Nepal. *BJOG An Int J Obstet Gynaecol* 2016;**123**:1532–40. doi:10.1111/1471-0528.13550
- 14 14
- 15 15 20 Bakri Balloon, Packaging Type: Box, Rs 9500 /pack Gyno Care Services | ID: 18666858655.
- 16 16 <https://www.indiamart.com/proddetail/bakri-balloon-18666858655.html> (accessed 20 Jul 2020).
- 17 17
- 18 18 21 Mishra S, Mohanty SK. Out-of-pocket expenditure and distress financing on institutional delivery
- 19 19 in India. *Int J Equity Health* 2019;**18**:99. doi:10.1186/s12939-019-1001-7
- 20 20
- 21 21 22 Ramanathan A, Eckardt MJ, Nelson BD, *et al.* Safety of a condom uterine balloon tamponade
- 22 22 (ESM-UBT) device for uncontrolled primary postpartum hemorrhage among facilities in Kenya
- 23 23 and Sierra Leone. *BMC Pregnancy Childbirth* 2018;**18**:1–7. doi:10.1186/s12884-018-1808-z
- 24 24
- 25 25 23 Burke TF, Danso-Bamfo S, Guha M, *et al.* Shock progression and survival after use of a condom
- 26 26 uterine balloon tamponade package in women with uncontrolled postpartum hemorrhage. *Int J Gynecol Obstet* 2017;**139**:34–8. doi:10.1002/ijgo.12251
- 27 27
- 28 28 24 Mollazadeh-Moghaddam K, Dundek M, Bellare A, *et al.* Mechanical Properties of the Every
- 29 29 Second Matters for Mothers-Uterine Balloon Tamponade (ESM-UBT) Device: In Vitro Tests. *AJP Rep* 2019;**9**:E376–83. doi:10.1055/s-0039-1697653
- 30 30
- 31 31 25 MOHFW G of I. Indian Public Health Standards: National Health Mission.
- 32 32 2007. <https://nhm.gov.in/index1.php?lang=1&level=2&sublinkid=971&lid=154> (accessed 17 Apr 2020).
- 33 33
- 34 34 26 National Rural Health Mission. Operational Guidelines on Maternal and Newborn Health. 2009;:54.
- 35 35
- 36 36 27 Department of Community Medicine and School of Public Health PGIMER Chandigarh.
- 37 37 [https://www.healthconomics.pgisph.in/costing\\_web/index.php?action=costing\\_method](https://www.healthconomics.pgisph.in/costing_web/index.php?action=costing_method) (accessed 17 Apr 2020).
- 38 38
- 39 39 28 Carroli G, Cuesta C, Abalos E, *et al.* Epidemiology of postpartum haemorrhage: a systematic
- 40 40 review. *Best Pract. Res. Clin. Obstet. Gynaecol.* 2008;**22**:999–1012. doi:10.1016/j.bpobgyn.2008.08.004
- 41 41
- 42 42 29 Aderoba AK, Olagbuji BN, Akintan AL, *et al.* Condom-catheter tamponade for the treatment of
- 43 43 postpartum haemorrhage and factors associated with success: a prospective observational study. *BJOG An Int J Obstet Gynaecol* 2017;**124**:1764–71. doi:10.1111/1471-0528.14361
- 44 44
- 45 45 30 Tasneem F, Sirsam S, Shanbhag V. Clinical study of post partum haemorrhage from a teaching
- 46 46 hospital in Maharashtra, India. *Int J Reprod Contraception, Obstet Gynecol* 2017;**6**:2366.

- 1  
2  
3 1 doi:10.18203/2320-1770.ijrcog20172314  
4  
5 2 31 Carroli G, Cuesta C, Abalos E, *et al.* Epidemiology of postpartum haemorrhage: a systematic  
6 3 review. *Best Pract. Res. Clin. Obstet. Gynaecol.* 2008;**22**:999–1012.  
7 4 doi:10.1016/j.bpobgyn.2008.08.004  
8  
9 5 32 Department of Health Research. *Health Technology Assessment in India A Manual.* 2018.  
10 6 <https://dhr.gov.in/> (accessed 1 Jul 2020).  
11  
12 7 33 Fox-Rushby, Julia, Cairns J. *Economic Evaluation - Fox-Rushby, Julia, Cairns, John.* 2005.  
13  
14 8 34 Venugopal P. World Development Indicators 1997. The World Bank. *Manag Labour Stud*  
15 9 1999;**24**:135–6. doi:10.1177/0258042x9902400208  
16 10 35 Marshall AL, Durani U, Bartley A, *et al.* The impact of postpartum hemorrhage on hospital length  
17 11 of stay and inpatient mortality: a National Inpatient Sample–based analysis. *Am J Obstet Gynecol*  
18 12 2017;**217**:344.e1-344.e6. doi:10.1016/j.ajog.2017.05.004  
19  
20 13 36 Joseph CM, Bhatia G, Abraham V, *et al.* Obstetric admissions to tertiary level intensive care unit –  
21 14 Prevalence, clinical characteristics and outcomes. *Indian J Anaesth* 2018;**62**:940–4.  
22 15 doi:10.4103/ija.IJA\_537\_18  
23  
24 16 37 Kumar P, Dhillon P. Length of stay after childbirth in India: A comparative study of public and  
25 17 private health institutions. *BMC Pregnancy Childbirth* 2020;**20**:181. doi:10.1186/s12884-020-  
26 18 2839-9  
27  
28 19 38 Ministry of Health and Family Welfare (Government of India). National Health Profile (NHP) of  
29 20 India- 2018 : Central Bureau of Health Intelligence. Published Online First:  
30 21 2018.<https://www.cbhidghs.nic.in/index1.php?lang=1&level=2&sublinkid=88&lid=1138>  
31 22 (accessed 1 Jul 2020).  
32  
33 23 39 Prinja S, Manchanda N, Aggarwal AK, *et al.* Cost & efficiency evaluation of a publicly financed  
34 24 & publicly delivered referral transport service model in three districts of Haryana State , India.  
35 25 2013;:1003–11.  
36  
37 26 40 Chauhan AS, Prinja S, Ghoshal S, *et al.* Cost of treatment for head and neck cancer in India. *PLoS*  
38 27 *One* 2018;**13**:1–13. doi:10.1371/journal.pone.0191132  
39  
40 28 41 Indicators AD. State Fact Sheet : FY 2018-2019 ( April -March ) Maharashtra Key Indicators.  
41 29 2019;**2019**.  
42  
43 30 42 Thi Win Shwe A, Riewpaiboon A, Chaikledkaew U, *et al.* Treatment cost and costing model of  
44 31 obstetric complications at a hospital in Myanmar. *PLoS One* 2019;**14**:e0213141.  
45 32 doi:10.1371/journal.pone.0213141  
46  
47 33 43 Vlassoff M, Abdalla HA, Gor V. The Cost to the Health System of Postpartum Hemorrhage in  
48 34 Egypt Key Points. Published Online First: 2016.[www.guttmacher.org](http://www.guttmacher.org) (accessed 6 Jun 2020).  
49  
50 35 44 CPI Inflation Calculator. [https://data.bls.gov/cgi-](https://data.bls.gov/cgi-bin/cpicalc.pl?cost1=27.04&year1=201506&year2=201706)  
51 36 [bin/cpicalc.pl?cost1=27.04&year1=201506&year2=201706](https://data.bls.gov/cgi-bin/cpicalc.pl?cost1=27.04&year1=201506&year2=201706) (accessed 6 Jun 2020).  
52  
53 37 45 Chatterjee S, Laxminarayan R. Costs of surgical procedures in Indian hospitals. *BMJ Open*  
54 38 2013;**3**. doi:10.1136/bmjopen-2013-002844  
55  
56 39 46 Machinery NHM, Transfer F. NHM in Maharashtra : Budget Trends 2015-16 to 2018-19. 2018.  
57  
58 40 47 National Health Mission, Ministry of Health and Family Welfare, Government of India. National

- 1  
2  
3 1 Urban Health Mission :: National Health Mission.  
4 2 2020;**12**.<https://nhm.gov.in/index1.php?lang=1&level=1&sublinkid=970&lid=137>  
5  
6 3 48 Dept. of Reproductive Health and Research W. WHO recommendations for the prevention and  
7 4 treatment of postpartum haemorrhage. 2012. [www.who.int/maternal\\_child\\_adolescent](http://www.who.int/maternal_child_adolescent) (accessed  
8 5 11 Jun 2020).  
9  
10 6 49 NavjaatShishu Suraksha Karyakram (NSSK). National Health Mission.  
11 7 <https://nhm.gov.in/index1.php?lang=1&level=3&sublinkid=842&lid=308> (accessed 7 Jun 2020).  
12  
13 8 50 | Ayushman Bharat I National Health Authority | GoI.  
14 9 <https://www.pmjay.gov.in/resources/documents> (accessed 7 Jun 2020).  
15  
16  
17  
18  
19  
20  
21  
22  
23  
24  
25  
26  
27  
28  
29  
30  
31  
32  
33  
34  
35  
36  
37  
38  
39  
40  
41  
42  
43  
44  
45  
46  
47  
48  
49  
50  
51  
52  
53  
54  
55  
56  
57  
58  
59  
60

## Supplementary material

**Table 1.1: Literature based event probabilities used for PPH utilization calculation of healthcare facilities**

| Input                                                                                                     | Value         | Reference                                                             |
|-----------------------------------------------------------------------------------------------------------|---------------|-----------------------------------------------------------------------|
| PPH incidence in vaginal delivery                                                                         | 3 percent     | [1,2]                                                                 |
| PPH incidence in caesarean delivery                                                                       | 6 percent     | [1,2]                                                                 |
| Atonic PPH incidence                                                                                      | 80 percent    | [3]                                                                   |
| Atonic PPH controlled with medical management                                                             | 90 percent    | [4]                                                                   |
| Clinical effectiveness of condom-UBT device in controlling atonic PPH                                     | 92.3 percent  | Calculated from literature review of 33 studies reported in Table 1.3 |
| Clinical effectiveness of ESM-UBT device in controlling atonic PPH                                        | 95.3 percent* | Calculated from literature review of 33 studies reported in Table 1.3 |
| Clinical effectiveness of condom-UBT device in controlling atonic PPH                                     | 84.3 percent  | Calculated from literature review of 33 studies reported in Table 1.3 |
| Probability of stepwise devascularization procedure for uncontrolled atonic PPH cases after UBT insertion | 0.85          | [4]                                                                   |
| Probability of obstetric hysterectomy for uncontrolled atonic PPH cases after UBT insertion               | 0.15          | [4]                                                                   |
| Probability of delivery at primary care level                                                             | 0.19          | [5]                                                                   |
| Probability of delivery at secondary care level                                                           | 0.33          | [5]                                                                   |
| Probability of delivery at tertiary care level                                                            | 0.48          | [5]                                                                   |

\* - Estimated from limited evidence from 3 case-series studies reported in Table 1.3

PPH incidence rate in vaginal/caesarean section delivery was applied to reported number of deliveries at each health facility to estimate number of PPH and thus proportional atonic PPH cases at the facility. Proportion of these atonic PPH cases uncontrolled after medical and supportive management were eligible for UBT device insertion. Literature review based clinical effectiveness of individual UBT device determined number of patients consequently needing conservative (devascularization) or obstetric hysterectomy surgical intervention.

**Table 1.2: Utilization of services for atonic PPH at chosen health facilities of Maharashtra based on primary collected data and event probabilities from literature**

| Type of Health facility | Mode of Delivery | Annual number of deliveries | Atonic PPH cases | Atonic PPH controlled with medical management | Cases requiring UBT insertion | Controlled with UBT insertion | Cases requiring further intervention |
|-------------------------|------------------|-----------------------------|------------------|-----------------------------------------------|-------------------------------|-------------------------------|--------------------------------------|
|                         |                  |                             |                  |                                               |                               | Condom Bakri ESM              | Condom Bakri ESM                     |
| PHC                     | Vaginal          | 494                         | 11.86            | 10.67                                         | 1.18                          | 1.09                          | 0.09                                 |
|                         |                  |                             |                  |                                               |                               | 1.00                          | 0.19                                 |
|                         |                  |                             |                  |                                               |                               | 1.13                          | 0.06                                 |
| SDH                     | Vaginal          | 1526                        | 36.62            | 32.96                                         | 3.66                          | 3.41                          | 0.26                                 |
|                         |                  |                             |                  |                                               |                               | 3.09                          | 0.57                                 |
|                         |                  |                             |                  |                                               |                               | 3.49                          | 0.17                                 |
|                         | Cesarean         | 330                         | 15.84            | 14.26                                         | 1.58                          | 1.47                          | 0.11                                 |
|                         |                  |                             |                  |                                               |                               | 1.34                          | 0.25                                 |
|                         |                  |                             |                  |                                               |                               | 1.51                          | 0.07                                 |
| DH                      | Vaginal          | 2986                        | 71.66            | 64.49                                         | 7.17                          | 6.66                          | 0.50                                 |
|                         |                  |                             |                  |                                               |                               | 6.04                          | 1.13                                 |
|                         |                  |                             |                  |                                               |                               | 6.83                          | 0.34                                 |
|                         | Cesarean         | 1045                        | 50.16            | 45.14                                         | 5.02                          | 4.66                          | 0.35                                 |
|                         |                  |                             |                  |                                               |                               | 4.23                          | 0.79                                 |
|                         |                  |                             |                  |                                               |                               | 4.78                          | 0.24                                 |
| Medical college         | Vaginal          | 2202                        | 52.84            | 47.56                                         | 5.28                          | 4.87                          | 0.37                                 |
|                         |                  |                             |                  |                                               |                               | 4.44                          | 0.83                                 |
|                         |                  |                             |                  |                                               |                               | 5.03                          | 0.25                                 |
|                         | Caesarean        | 1141                        | 54.76            | 49.29                                         | 5.47                          | 5.05                          | 0.42                                 |
|                         |                  |                             |                  |                                               |                               | 4.61                          | 0.85                                 |
|                         |                  |                             |                  |                                               |                               | 5.21                          | 0.25                                 |



**Table 1.3: Details of the studies included in targeted literature review for the three UBT devices**

| Authors           | Study design      | PPH success rate | Atonic PPH success rate | Reference |
|-------------------|-------------------|------------------|-------------------------|-----------|
| <b>Condom-UBT</b> |                   |                  |                         |           |
| Darwish et al.    | RCT               | 28/33 (84.8)     | 28/33 (84.8)            | [6]       |
| Tindell et al.    | Systematic Review | 186/193 (96.4)   | NR                      | [7]       |
| Santhanam et al.  | Prospective       | 59/61 (96.7)     | 59/61 (96.7)            | [8]       |
| Rathore et al.    | Prospective       | 17/18 (94.4)     | NR                      | [9]       |
| Aderoba et al.    | Prospective       | 203/229 (88.6)   | 193/214 (90.2)          | [10]      |
| Mishra et al.     | Prospective       | 59/60 (98.3)     | NR                      | [11]      |
| Kandeel et al.    | Prospective       | 48/50 (96.0)     | 28/28 (100)             | [12]      |
| Anger et al.      | RCT               | 56/64 (87.5)     | NR                      | [13]      |
| Dumont et al.     | RCT               | 48/57 (84.2)     | NR                      | [14]      |
| Lohano et al.     | Prospective       | 126/139 (90.6)   | 126/139 (90.6)          | [15]      |
| Hasabe et al.     | Prospective       | 34/36 (94.4)     | NR                      | [16]      |
| Yadav et al.      | Prospective       | 117/122 (95.9)   | 117/122 (95.9)          | [17]      |
| <b>Bakri-UBT</b>  |                   |                  |                         |           |
| Darwish et al.    | RCT               | 30/33 (90.9)     | 30/33 (90.9)            | [6]       |
| Revert et al.     | Prospective       | 188/226 (83.2)   | 155/183 (84.7)          | [18]      |
| Brown et al.      | Prospective       | 55/58 (94.8)     | 52/55 (94.5)            | [19]      |
| Vintejoux et al.  | Retrospective     | 25/36 (69.4)     | 25/36 (69.4)            | [20]      |
| Guo et al.        | Retrospective     | 288/305 (94.4)   | 131/142 (92.3)          | [21]      |
| Mathur et al.     | Retrospective     | 40/49 (81.6)     | 14/17 (82.4)            | [22]      |
| Wang et al.       | Prospective       | 373/407 (91.6)   | 373/407 (91.6)          | [23]      |
| Alkis et al.      | Retrospective     | 43/47 (91.5)     | NR                      | [24]      |
| Kaya et al.       | Prospective       | 34/45 (75.6)     | 27/34 (79.4)            | [25]      |
| Laas et al.       | Before and after  | 37/43 (86)       | 37/43 (86)              | [26]      |
| Olsen et al.      | Retrospective     | 25/37 (67.6)     | 17/24 (70.8)            | [27]      |
| Kong et al.       | Retrospective     | 59/81 (72.8)     | 37/59 (62.7)            | [28]      |
| Cetin et al.      | Retrospective     | 29/39 (74.4)     | 29/39 (74.4)            | [29]      |
| Gauchotte et al.  | Before and after  | 35/38 (92.1)     | NR                      | [30]      |
| Grange et al.     | Retrospective     | 80/108 (74.1)    | 26/39 (66.7)            | [31]      |
| Kadioglu et al.   | Retrospective     | 42/50 (84)       | NR                      | [32]      |

|                  |                                              |                     |                |      |
|------------------|----------------------------------------------|---------------------|----------------|------|
| Martin et al.    | Retrospective                                | 32/49 (65.3)        | 28/42 (66.7)   | [33] |
| Ogoyama et al.   | Retrospective                                | 66/71 (93)          | 31/32 (96.9)   | [34] |
| Son et al.       | Retrospective                                | 239/306 (78.1)      | 190/241 (78.8) | [35] |
| <b>ESM-UBT</b>   |                                              |                     |                |      |
| Ramanathan et al | Prospective/<br>Retrospective case<br>series | 189/201<br>(94) *   | NR             | [36] |
| Burke et al.     | Prospective case<br>series                   | 190/201<br>(94.5) * | NR             | [37] |
| Burke et al.     | Prospective case<br>series                   | 298/306<br>(97.4) * | 298/306 (97.4) | [38] |

\* - Reported survival rates

NR – Not reported

## REFERENCES

- 1 Rastogi A, Zahid. Postpartum haemorrhage | National Health Portal Of India. Natl. Heal. Portal India. 2017.<https://www.nhp.gov.in/disease/gynaecology-and-obstetrics/postpartum-haemorrhage> (accessed 20 Jul 2020).
- 2 Carroli G, Cuesta C, Abalos E, *et al.* Epidemiology of postpartum haemorrhage: a systematic review. *Best Pract. Res. Clin. Obstet. Gynaecol.* 2008;**22**:999–1012. doi:10.1016/j.bpobgyn.2008.08.004
- 3 Dutta D. *Textbook of Obstetrics.* 2015.
- 4 Tasneem F, Sirsam S, Shanbhag V. Clinical study of post partum haemorrhage from a teaching hospital in Maharashtra, India. *Int J Reprod Contraception, Obstet Gynecol* 2017;**6**:2366. doi:10.18203/2320-1770.ijrcog20172314
- 5 International Institute for Population Sciences. National Family Health Survey (NFHS-4) 2015-16 India. *Int Inst Popul Sci ICF* 2017;:1–192. doi:kwm120 [pii]10.1093/aje/kwm120
- 6 Darwish AM, Abdallah MM, Shaaban OM, *et al.* Bakri balloon versus condom-loaded Foley's catheter for treatment of atonic postpartum hemorrhage secondary to vaginal delivery: a randomized controlled trial. *J Matern Neonatal Med* 2018;**31**:747–53. doi:10.1080/14767058.2017.1297407
- 7 Tindell K, Garfinkel R, Abu-Haydar E, *et al.* Uterine balloon tamponade for the treatment of postpartum haemorrhage in resource-poor settings: A systematic review. *BJOG An Int. J. Obstet. Gynaecol.* 2013;**120**:5–14. doi:10.1111/j.1471-0528.2012.03454.x
- 8 Santhanam R, Viswanathan RM, V. P. Condom tamponade in the management of atonic postpartum hemorrhage. *Int J Reprod Contraception, Obstet Gynecol* 2018;**7**:2276. doi:10.18203/2320-1770.ijrcog20182335
- 9 Rathore AM, Gupta S, Manaktala U, *et al.* Uterine tamponade using condom catheter balloon in the management of non-traumatic postpartum hemorrhage. *J Obstet Gynaecol Res* 2012;**38**:1162–7. doi:10.1111/j.1447-0756.2011.01843.x
- 10 Aderoba A, Olagbuji B, Akintan A, *et al.* Condom-catheter tamponade for the treatment of postpartum haemorrhage and factors associated with success: a prospective observational study. *BJOG An Int J Obstet Gynaecol* 2017;**124**:1764–71. doi:10.1111/1471-0528.14361
- 11 Mishra N, Gulabani K, Agrawal S, *et al.* Efficacy and Feasibility of Chhattisgarh Balloon and Conventional Condom Balloon Tamponade: A 2-Year Prospective Study. *J Obstet Gynecol India* 2019;**69**:133–41. doi:10.1007/s13224-018-1185-6
- 12 Kandeel M, Sanad Z, Ellakwa H, *et al.* Management of postpartum hemorrhage with intrauterine balloon tamponade using a condom catheter in an Egyptian setting. *Int J Gynecol Obstet* 2016;**135**:272–5. doi:10.1016/j.ijgo.2016.06.018
- 13 Anger HA, Dabash R, Durocher J, *et al.* The effectiveness and safety of introducing condom-catheter uterine balloon tamponade for postpartum haemorrhage at secondary level hospitals in Uganda, Egypt and Senegal: a stepped wedge, cluster-randomised trial. *BJOG An Int J Obstet Gynaecol* 2019;**126**:1612–21. doi:10.1111/1471-0528.15903
- 14 Dumont A, Bodin C, Hounkpatin B, *et al.* Uterine balloon tamponade as an adjunct to misoprostol for the treatment of uncontrolled postpartum haemorrhage: A randomised controlled trial in Benin and Mali. *BMJ Open* 2017;**7**:1–9. doi:10.1136/bmjopen-2017-016590
- 15 Lohano R, Haq G, Kazi S, *et al.* Intrauterine balloon tamponade for the control of postpartum haemorrhage. *J Pak Med Assoc* 2016;**66**:22–6.
- 16 Hasabe R, Gupta K, Rathode P. Use of Condom Tamponade to Manage Massive Obstetric Hemorrhage at a Tertiary Center in Rajasthan. *J Obstet Gynecol India* 2016;**66**:88–93. doi:10.1007/s13224-015-0790-x
- 17 Yadav S, Malhotra A. A prospective randomized comparative study of Misoprostol and balloon tamponade using condom catheter to prevent postpartum hemorrhage at M. Y. H., Indore, India in vaginal delivered patients. *Int J Reprod Contraception, Obstet Gynecol* 2019;**8**:591. doi:10.18203/2320-1770.ijrcog20190290
- 18 Revert M, Cottenet J, Raynal P, *et al.* Intrauterine balloon tamponade for management of

- 1  
2  
3 severe postpartum haemorrhage in a perinatal network: a prospective cohort study. *BJOG An*  
4 *Int J Obstet Gynaecol* 2017;**124**:1255–62. doi:10.1111/1471-0528.14382
- 5 19 Brown H, Okeyo S, Mabeya H, *et al.* The Bakri tamponade balloon as an adjunct treatment for  
6 refractory postpartum hemorrhage. *Int J Gynecol Obstet* 2016;**135**:276–80.  
7 doi:10.1016/j.ijgo.2016.06.021
- 8 20 Vintejoux E, Ulrich D, Mousty E, *et al.* Success factors for Bakri™ balloon usage secondary  
9 to uterine atony: A retrospective, multicentre study. *Aust New Zeal J Obstet Gynaecol*  
10 2015;**55**:572–7. doi:10.1111/ajo.12376
- 11 21 Guo Y, Hua R, Bian S, *et al.* Intrauterine Bakri Balloon and Vaginal Tamponade Combined  
12 with Abdominal Compression for the Management of Postpartum Hemorrhage. *J Obstet*  
13 *Gynaecol Canada* 2018;**40**:561–5. doi:10.1016/j.jogc.2017.08.035
- 14 22 Mathur M, Ng QJ, Tagore S. Use of Bakri balloon tamponade (BBT) for conservative  
15 management of postpartum haemorrhage: a tertiary referral centre case series. *J Obstet*  
16 *Gynaecol (Lahore)* 2018;**38**:66–70. doi:10.1080/01443615.2017.1328671
- 17 23 Wang D, Xu S, Qiu X, *et al.* Early usage of Bakri postpartum balloon in the management of  
18 postpartum hemorrhage: A large prospective, observational multicenter clinical study in South  
19 China. *J Perinat Med* 2018;**46**:649–56. doi:10.1515/jpm-2017-0249
- 20 24 Alkiş I, Karaman E, Han A, *et al.* The fertility sparing management of postpartum  
21 hemorrhage: A series of 47 cases of Bakri balloon tamponade. *Taiwan J Obstet Gynecol*  
22 2015;**54**:232–5. doi:10.1016/j.tjog.2014.03.009
- 23 25 Kaya B, Tuten A, Daglar K, *et al.* Balloon tamponade for the management of postpartum  
24 uterine hemorrhage. *J Perinat Med* 2014;**42**:745–53. doi:10.1515/jpm-2013-0336
- 25 26 Laas E, Bui C, Popowski T, *et al.* Trends in the rate of invasive procedures after the addition  
26 of the intrauterine tamponade test to a protocol for management of severe postpartum  
27 hemorrhage. *Am J Obstet Gynecol* 2012;**207**:281.e1–281.e7. doi:10.1016/j.ajog.2012.08.028
- 28 27 Olsen R, Reisner DP, Benedetti TJ, *et al.* Bakri balloon effectiveness for postpartum  
29 hemorrhage: A ‘real world experience’. *J Matern Neonatal Med* 2013;**26**:1720–3.  
30 doi:10.3109/14767058.2013.796354
- 31 28 Kong CW, To WW. Prognostic factors for the use of intrauterine balloon tamponade in the  
32 management of severe postpartum hemorrhage. *Int J Gynecol Obstet* 2018;**142**:48–53.  
33 doi:10.1002/ijgo.12498
- 34 29 Çetin BA, Aydoğan Mathyk B, Atis Aydin A, *et al.* Comparing success rates of the Hayman  
35 compression suture and the Bakri balloon tamponade. *J Matern Neonatal Med* 2019;**32**:3034–  
36 8. doi:10.1080/14767058.2018.1455184
- 37 30 Gauchotte E, De La Torre M, Perdriolle-Galet E, *et al.* Impact of uterine balloon tamponade  
38 on the use of invasive procedures in severe postpartum hemorrhage. *Acta Obstet Gynecol*  
39 *Scand* 2017;**96**:877–82. doi:10.1111/aogs.13130
- 40 31 Grange J, Chatellier M, Chev e MT, *et al.* Predictors of failed intrauterine balloon tamponade  
41 for persistent postpartum hemorrhage after vaginal delivery. *PLoS One* 2018;**13**:1–11.  
42 doi:10.1371/journal.pone.0206663
- 43 32 Kadioglu BG, Tanriverdi EC, Aksoy AN. Balloon Tamponade in the Management of  
44 Postpartum Hemorrhage: Three Years of Experience in a Single Center. *Open J Obstet*  
45 *Gynecol* 2016;**06**:698–704. doi:10.4236/ojog.2016.612087
- 46 33 Martin E, Legendre G, Bouet PE, *et al.* Maternal outcomes after uterine balloon tamponade for  
47 postpartum hemorrhage. *Acta Obstet Gynecol Scand* 2015;**94**:399–404.  
48 doi:10.1111/aogs.12591
- 49 34 Ogoyama M, Takahashi H, Usui R, *et al.* Hemostatic effect of intrauterine balloon for  
50 postpartum hemorrhage with special reference to concomitant use of ‘‘holding the cervix’’  
51 procedure (Matsubara). *Eur J Obstet Gynecol Reprod Biol* 2017;**210**:281–5.  
52 doi:10.1016/j.ejogrb.2017.01.012
- 53 35 Son M, Einerson BD, Schneider P, *et al.* Is There an Association between Indication for  
54 Intrauterine Balloon Tamponade and Balloon Failure? *Am J Perinatol* 2017;**34**:164–8.  
55 doi:10.1055/s-0036-1585084
- 56 36 Ramanathan A, Eckardt MJ, Nelson BD, *et al.* Safety of a condom uterine balloon tamponade  
57 (ESM-UBT) device for uncontrolled primary postpartum hemorrhage among facilities in  
58  
59  
60

- 1  
2  
3 Kenya and Sierra Leone. *BMC Pregnancy Childbirth* 2018;**18**:1–7. doi:10.1186/s12884-018-  
4 1808-z
- 5 37 Burke TF, Ahn R, Nelson BD, *et al.* A postpartum haemorrhage package with condom uterine  
6 balloon tamponade: a prospective multi-centre case series in Kenya, Sierra Leone, Senegal,  
7 and Nepal. *BJOG An Int J Obstet Gynaecol* 2016;**123**:1532–40. doi:10.1111/1471-0528.13550
- 8 38 Burke TF, Danso-Bamfo S, Guha M, *et al.* Shock progression and survival after use of a  
9 condom uterine balloon tamponade package in women with uncontrolled postpartum  
10 hemorrhage. *Int J Gynecol Obstet* 2017;**139**:34–8. doi:10.1002/ijgo.12251  
11  
12  
13  
14  
15  
16  
17  
18  
19  
20  
21  
22  
23  
24  
25  
26  
27  
28  
29  
30  
31  
32  
33  
34  
35  
36  
37  
38  
39  
40  
41  
42  
43  
44  
45  
46  
47  
48  
49  
50  
51  
52  
53  
54  
55  
56  
57  
58  
59  
60

1  
2  
3 **Research Checklist**  
4  
5

6 **CHEERS CHECKLIST**  
7

8 **Items to include when reporting economic evaluations of health interventions**  
9

| Section/item                    | Item No | Recommendation                                                                                                                                                                          | Reported on page No/ line No                                     |
|---------------------------------|---------|-----------------------------------------------------------------------------------------------------------------------------------------------------------------------------------------|------------------------------------------------------------------|
| <b>Title and abstract</b>       |         |                                                                                                                                                                                         |                                                                  |
| Title                           | 1       | Identify the study as an economic evaluation or use more specific terms such as “cost-effectiveness analysis”, and describe the interventions compared.                                 | Page number 03, lines 01 to 02                                   |
| Abstract                        | 2       | Provide a structured summary of objectives, perspective, setting, methods (including study design and inputs), results (including base case and uncertainty analyses), and conclusions. | Page number 03, lines 05 to 22<br>Page number 04, lines 01 to 11 |
| <b>Introduction</b>             |         |                                                                                                                                                                                         |                                                                  |
| Background and objectives       | 3       | Provide an explicit statement of the broader context for the study.                                                                                                                     | Page number 08, lines 01 to 05                                   |
|                                 |         | Present the study question and its relevance for health policy or practice decisions.                                                                                                   | Page number 08, lines 03 to 07                                   |
| <b>Methods</b>                  |         |                                                                                                                                                                                         |                                                                  |
| Target population and subgroups | 4       | Describe characteristics of the base case population and subgroups analysed, including why they were chosen.                                                                            | Page number 08, lines 13 to 17                                   |
| Setting and location            | 5       | State relevant aspects of the system(s) in which the decision(s) need(s) to be made.                                                                                                    | Page number 08, lines 03 to 09<br>Page number 08, lines 13 to 17 |
| Study perspective               | 6       | Describe the perspective of the study and relate this to the costs being evaluated.                                                                                                     | Page number 08, lines 13 to 17                                   |

| Section/item                                           | Item No | Recommendation                                                                                                                                                                                                           | Reported on page No/ line No                                        |
|--------------------------------------------------------|---------|--------------------------------------------------------------------------------------------------------------------------------------------------------------------------------------------------------------------------|---------------------------------------------------------------------|
| Comparators                                            | 7       | Describe the interventions or strategies being compared and state why they were chosen.                                                                                                                                  | Page number 08, lines 07 to 09                                      |
| Time horizon                                           | 8       | State the time horizon(s) over which costs and consequences are being evaluated and say why appropriate.                                                                                                                 | Page number 09, lines 12 to 13                                      |
| Discount rate                                          | 9       | Report the choice of discount rate(s) used for costs and outcomes and say why appropriate.                                                                                                                               | Page number 12, lines 10 to 12                                      |
| Choice of health outcomes                              | 10      | Describe what outcomes were used as the measure(s) of benefit in the evaluation and their relevance for the type of analysis performed.                                                                                  | Not applicable                                                      |
| Measurement of effectiveness                           | 11a     | <i>Single study-based estimates:</i> Describe fully the design features of the single effectiveness study and why the single study was a sufficient source of clinical effectiveness data.                               | Not applicable                                                      |
|                                                        | 11b     | <i>Synthesis-based estimates:</i> Describe fully the methods used for identification of included studies and synthesis of clinical effectiveness data.                                                                   | Page number 07, Table 1<br>Supplementary material file 1, Table 1.3 |
| Measurement and valuation of preference based outcomes | 12      | If applicable, describe the population and methods used to elicit preferences for outcomes.                                                                                                                              | Not applicable                                                      |
| Estimating resources and costs                         | 13a     | <i>Single study-based economic evaluation:</i> Describe approaches used to estimate resource use associated with the alternative interventions. Describe primary or secondary research methods for valuing each resource | Page number 08 to page number 15                                    |

| Section/item                         | Item No | Recommendation                                                                                                                                                                                                                                                                                                              | Reported on page No/ line No                                     |
|--------------------------------------|---------|-----------------------------------------------------------------------------------------------------------------------------------------------------------------------------------------------------------------------------------------------------------------------------------------------------------------------------|------------------------------------------------------------------|
|                                      |         | item in terms of its unit cost. Describe any adjustments made to approximate to opportunity costs.                                                                                                                                                                                                                          |                                                                  |
|                                      | 13b     | <i>Model-based economic evaluation:</i> Describe approaches and data sources used to estimate resource use associated with model health states. Describe primary or secondary research methods for valuing each resource item in terms of its unit cost. Describe any adjustments made to approximate to opportunity costs. | Not applicable                                                   |
| Currency, price date, and conversion | 14      | Report the dates of the estimated resource quantities and unit costs. Describe methods for adjusting estimated unit costs to the year of reported costs if necessary. Describe methods for converting costs into a common currency base and the exchange rate.                                                              | Page number 12, line 24<br>Page number 13, lines 01 to 02        |
| Choice of model                      | 15      | Describe and give reasons for the specific type of decision-analytical model used. Providing a figure to show model structure is strongly recommended.                                                                                                                                                                      | Not applicable                                                   |
| Assumptions                          | 16      | Describe all structural or other assumptions underpinning the decision-analytical model.                                                                                                                                                                                                                                    | Page number 14, lines 07 to 18                                   |
| Analytical methods                   | 17      | Describe all analytical methods supporting the evaluation. This could include methods for dealing with skewed, missing, or censored data; extrapolation methods; methods for pooling data; approaches to validate or make adjustments (such as half cycle                                                                   | Page number 14, lines 19 to 25<br>Page number 15, lines 01 to 02 |



| Section/item                   | Item No | Recommendation                                                                                                                                                                                                                                                              | Reported on page No/ line No                                                                                    |
|--------------------------------|---------|-----------------------------------------------------------------------------------------------------------------------------------------------------------------------------------------------------------------------------------------------------------------------------|-----------------------------------------------------------------------------------------------------------------|
|                                |         | corrections) to a model; and methods for handling population heterogeneity and uncertainty.                                                                                                                                                                                 |                                                                                                                 |
| <b>Results</b>                 |         |                                                                                                                                                                                                                                                                             |                                                                                                                 |
| Study parameters               | 18      | Report the values, ranges, references, and, if used, probability distributions for all parameters. Report reasons or sources for distributions used to represent uncertainty where appropriate. Providing a table to show the input values is strongly recommended.         | Page number 14, lines 19 to 25<br>Page number 15, lines 01 to 02 and lines 05 to 10                             |
| Incremental costs and outcomes | 19      | For each intervention, report mean values for the main categories of estimated costs and outcomes of interest, as well as mean differences between the comparator groups. If applicable, report incremental cost-effectiveness ratios.                                      | Page number 15, lines 12 to 24<br>Page number 16, Table 3<br>Page number 18, Table 4<br>Page number 20, Table 5 |
| Characterising uncertainty     | 20a     | <i>Single study-based economic evaluation:</i> Describe the effects of sampling uncertainty for the estimated incremental cost and incremental effectiveness parameters, together with the impact of methodological assumptions (such as discount rate, study perspective). | Page number 16, Table 3<br>Page number 18, Table 4<br>Page number 20, Table 5                                   |
|                                | 20b     | <i>Model-based economic evaluation:</i> Describe the effects on the results of uncertainty for all input parameters, and uncertainty related to the structure of the model and assumptions.                                                                                 | Not applicable                                                                                                  |
| Characterising heterogeneity   | 21      | If applicable, report differences in costs, outcomes, or cost-effectiveness that can be explained by variations                                                                                                                                                             | Not applicable                                                                                                  |

| Section/item                                                         | Item No | Recommendation                                                                                                                                                                                                                                    | Reported on page No/ line No                                                                                                         |
|----------------------------------------------------------------------|---------|---------------------------------------------------------------------------------------------------------------------------------------------------------------------------------------------------------------------------------------------------|--------------------------------------------------------------------------------------------------------------------------------------|
|                                                                      |         | between subgroups of patients with different baseline characteristics or other observed variability in effects that are not reducible by more information.                                                                                        |                                                                                                                                      |
| <b>Discussion</b>                                                    |         |                                                                                                                                                                                                                                                   |                                                                                                                                      |
| Study findings, limitations, generalisability, and current knowledge | 22      | Summarise key study findings and describe how they support the conclusions reached. Discuss limitations and the generalisability of the findings and how the findings fit with current knowledge.                                                 | Page number 21, lines 03 to 24<br>Page number 22, lines 01 to 24<br>Page number 23, lines 22 to 25<br>Page number 24, lines 01 to 13 |
| <b>Other</b>                                                         |         |                                                                                                                                                                                                                                                   |                                                                                                                                      |
| Source of funding                                                    | 23      | Describe how the study was funded and the role of the funder in the identification, design, conduct, and reporting of the analysis. Describe other non-monetary sources of support.                                                               | Page number 25, lines 19 to 21                                                                                                       |
| Conflicts of interest                                                | 24      | Describe any potential for conflict of interest of study contributors in accordance with journal policy. In the absence of a journal policy, we recommend authors comply with International Committee of Medical Journal Editors recommendations. | Page number 25, lines 22 to 23                                                                                                       |

# BMJ Open

## Cost of managing atonic postpartum hemorrhage with uterine balloon tamponade devices in public health settings of Maharashtra, India: An economic micro-costing study

|                                 |                                                                                                                                                                                                                                                                                                                                                                                                                                                                                                                                      |
|---------------------------------|--------------------------------------------------------------------------------------------------------------------------------------------------------------------------------------------------------------------------------------------------------------------------------------------------------------------------------------------------------------------------------------------------------------------------------------------------------------------------------------------------------------------------------------|
| Journal:                        | <i>BMJ Open</i>                                                                                                                                                                                                                                                                                                                                                                                                                                                                                                                      |
| Manuscript ID                   | bmjopen-2020-042389.R2                                                                                                                                                                                                                                                                                                                                                                                                                                                                                                               |
| Article Type:                   | Original research                                                                                                                                                                                                                                                                                                                                                                                                                                                                                                                    |
| Date Submitted by the Author:   | 13-Jan-2021                                                                                                                                                                                                                                                                                                                                                                                                                                                                                                                          |
| Complete List of Authors:       | Shetty, Siddesh; National Institute for Research in Reproductive Health, Regional Resource Hub for Health Technology Assessment in India Moray, Kusum; National Institute for Research in Reproductive Health, Regional Resource Hub for Health Technology Assessment in India Chaurasia, Himanshu; National Institute for Research in Reproductive Health, Regional Resource Hub for Health Technology Assessment in India Joshi, Beena; National Institute for Research in Reproductive Health, Department of Operational Research |
| <b>Primary Subject Heading</b>: | Health economics                                                                                                                                                                                                                                                                                                                                                                                                                                                                                                                     |
| Secondary Subject Heading:      | Obstetrics and gynaecology, Public health, Health policy                                                                                                                                                                                                                                                                                                                                                                                                                                                                             |
| Keywords:                       | Maternal medicine < OBSTETRICS, PUBLIC HEALTH, HEALTH ECONOMICS, Health economics < HEALTH SERVICES ADMINISTRATION & MANAGEMENT                                                                                                                                                                                                                                                                                                                                                                                                      |
|                                 |                                                                                                                                                                                                                                                                                                                                                                                                                                                                                                                                      |

SCHOLARONE™  
Manuscripts



I, the Submitting Author has the right to grant and does grant on behalf of all authors of the Work (as defined in the below author licence), an exclusive licence and/or a non-exclusive licence for contributions from authors who are: i) UK Crown employees; ii) where BMJ has agreed a CC-BY licence shall apply, and/or iii) in accordance with the terms applicable for US Federal Government officers or employees acting as part of their official duties; on a worldwide, perpetual, irrevocable, royalty-free basis to BMJ Publishing Group Ltd ("BMJ") its licensees and where the relevant Journal is co-owned by BMJ to the co-owners of the Journal, to publish the Work in this journal and any other BMJ products and to exploit all rights, as set out in our [licence](#).

The Submitting Author accepts and understands that any supply made under these terms is made by BMJ to the Submitting Author unless you are acting as an employee on behalf of your employer or a postgraduate student of an affiliated institution which is paying any applicable article publishing charge ("APC") for Open Access articles. Where the Submitting Author wishes to make the Work available on an Open Access basis (and intends to pay the relevant APC), the terms of reuse of such Open Access shall be governed by a Creative Commons licence – details of these licences and which [Creative Commons](#) licence will apply to this Work are set out in our licence referred to above.

Other than as permitted in any relevant BMJ Author's Self Archiving Policies, I confirm this Work has not been accepted for publication elsewhere, is not being considered for publication elsewhere and does not duplicate material already published. I confirm all authors consent to publication of this Work and authorise the granting of this licence.

1  
2  
3 1 **Cost of managing atonic postpartum hemorrhage with uterine balloon tamponade devices**  
4  
5 2 **in public health settings of Maharashtra, India: An economic micro-costing study**  
6  
7

8  
9 3

10  
11 4 **Authors and Affiliations:**  
12  
13

14 5

15  
16 6 Dr. Siddesh Sitaram Shetty

17  
18  
19 7 Regional Resource Hub for Health Technology Assessment in India,  
20

21  
22 8 Indian Council of Medical Research - National Institute for Research in Reproductive Health, Mumbai,  
23

24 9 India  
25  
26

27 10

28  
29  
30 11 Dr. Kusum Venkobrao Moray

31  
32 12 Regional Resource Hub for Health Technology Assessment in India,  
33

34  
35 13 Indian Council of Medical Research - National Institute for Research in Reproductive Health, Mumbai,  
36

37 14 India  
38  
39

40 15

41  
42  
43 16 Mr. Himanshu Chaurasia

44  
45  
46 17 Regional Resource Hub for Health Technology Assessment in India,  
47

48  
49 18 Indian Council of Medical Research - National Institute for Research in Reproductive Health, Mumbai,  
50

51 19 India  
52  
53

54 20  
55  
56  
57  
58  
59  
60

1  
2  
3 1 Dr. Beena Nitin Joshi (**Corresponding Author**)  
4

5  
6 2 Department of Operational Research,  
7

8  
9 3 Indian Council of Medical Research - National Institute for Research in Reproductive Health, Mumbai  
10

11 4 Jehangir Merwanji Street, Parel, Mumbai, Maharashtra, India  
12

13  
14 5 Phone number: +91-9820252672 / Office number: +(91-22)24192043  
15

16  
17 6 Email ID – bjoshithane@gmail.com  
18

19  
20 7  
21

22 8 **Manuscript details**  
23

24  
25 9 Abstract – 300 words  
26

27  
28 10 Manuscript – 4672 words  
29

30  
31 11 Tables – 5  
32

33  
34 12 Supplemental material – 1  
35

36 13 Research Checklist  
37

38  
39 14  
40

41  
42 15  
43

44  
45 16 **Keywords**  
46

47 17 Economic costing, postpartum hemorrhage, Uterine balloon tamponade, public health system cost  
48

49  
50 18  
51

52  
53 19  
54

55  
56 20  
57

1  
2  
3 1 **Cost of managing atonic postpartum hemorrhage with uterine balloon tamponade devices**  
4  
5 2 **in public health settings of Maharashtra, India: An economic micro-costing study**  
6  
7  
8  
9 3

10  
11 4 **ABSTRACT**  
12  
13

14 5 **Objective**

15  
16  
17 6 Post-partum hemorrhage (PPH) is the worldwide leading cause of preventable maternal mortality. India  
18  
19 7 offers free treatment for pregnancy and related complications in its public health facilities. Management  
20  
21 8 with Uterine Balloon Tamponade (UBT) is recommended for refractory atonic PPH cases. As part of health  
22  
23 9 technology assessment to determine the most cost-effective UBT device, this study estimated costs of atonic  
24  
25 10 PPH management with condom-UBT, Every Second Matters (ESM) UBT and Bakri balloon UBT in public  
26  
27 11 health system of Maharashtra, India.  
28  
29

30 12 **Design**

31  
32  
33 13 Health system cost was estimated using primary economic micro-costing, data from Health Management  
34  
35 14 Information System (HMIS) and published literature for event probabilities.  
36  
37

38 15 **Settings**

39  
40 16 Four public health facilities from the state of Maharashtra, India representing primary, secondary and  
41  
42 17 tertiary level care were chosen for primary costing.  
43  
44

45 18 **Outcome measures**

46  
47  
48 19 Unit, package and annual cost of atonic PPH management with three UBT devices were measured. This  
49  
50 20 included cost of medical management, UBT intervention and PPH related surgeries undertaken in public  
51  
52 21 health system of Maharashtra for year 2017-18.  
53  
54

55 22 **Results**  
56  
57  
58  
59  
60

1  
2  
3 1 Medical management of atonic PPH cost the health system USD 37 (95% CI 29-45) per case, increasing to  
4  
5 2 USD 44 (95% CI 36-53) with condom-UBT and surgical interventions for uncontrolled cases. Similar cost  
6  
7 3 was estimated for ESM-UBT. Bakri-UBT reported a higher cost of USD 59 (95% CI 46-73) per case.  
8  
9 4 Overall annual cost of managing 27,915 atonic PPH cases with condom-UBT intervention in Maharashtra  
10  
11 5 was USD 1,226,610 (95% CI 870,250 – 1,581,596).  
12  
13

## 14 6 **Conclusions**

15  
16  
17 7 Atonic PPH management in public health facilities of Maharashtra with condom-UBT, ESM-UBT or Bakri  
18  
19 8 UBT accounts to 3.8%, 3.8% or 5.2% of the state's annual spending on reproductive and child health  
20  
21 9 services. These findings can guide policymakers to include PPH complication management in publicly  
22  
23 10 financed health schemes. Economic evaluation studies can use this evidence to determine cost-effectiveness  
24  
25 11 of UBT in Indian settings.  
26  
27  
28  
29  
30

## 31 13 **Strengths and limitations of this study**

- 32  
33  
34 14 • To our knowledge, this is the first study from India comprehensively assessing public health  
35  
36 15 system costs for overall management of atonic PPH with medical interventions, uterine balloon  
37  
38 16 tamponade and surgical management across all public healthcare levels in the state  
39  
40 17 • The study uses clinical effectiveness evidence of individual uterine balloon tamponade devices to  
41  
42 18 determine health system costs  
43  
44 19 • As disaggregated HMIS data in the study setting was not available for PPH, literature-based event  
45  
46 20 probability estimates from the Indian context were relied upon to estimate costs  
47  
48 21 • An assumption was made that for a particular UBT device, all eligible cases would receive only  
49  
50 22 that particular UBT across all facilities.  
51  
52  
53  
54 23



## 1 INTRODUCTION

2 The global shift towards Universal Health Coverage (UHC) indicated by Sustainable Development Goals  
3 (SDG) needs robust financing mechanisms. To achieve desired targets, evidence informed by costing  
4 studies can be vital to support financing decisions. Information on cost enables improved resource  
5 allocation, thus strengthening policy measures to attain highest value for a given investment. A key priority  
6 under the SDG health goal is reduction of maternal mortality levels to less than 70 per 100,000 live births  
7 by year 2030. Evidence confirms women's health to be associated with development and economic  
8 performance of a country.[1] A marginal health investment at lower GDP levels seen commonly in low or  
9 low-middle income countries is found to have higher effects on health outcomes.[2] Improved maternal  
10 health not only reduces household healthcare expenditure, but is also associated with long term economic  
11 benefits to the society.

12 In spite of a low spending of 1% of GDP on public health expenditure, India has managed to reduce maternal  
13 mortality ratio down to 122 per 100,000 live births by the year 2015-17, largely attributed to reforms such  
14 as institutionalization of deliveries, provisioning of free cashless services to pregnant women and by  
15 addressing social determinants of health.[3-5] Despite ongoing efforts, India still accounts for nearly one-  
16 fifth of all maternal deaths globally with hemorrhage as the leading cause.[6] Post-Partum Hemorrhage  
17 (PPH) accounts for more than two-third of all global maternal deaths due to bleeding.[7,8] PPH is defined  
18 as maternal blood loss of 500 ml or more within 24 hours after delivery and affects nearly 3-6% of all  
19 women giving birth in India.[9] Atony of uterus is the most common PPH type responsible for 80% of all  
20 cases.[10]

21 Indian guidelines base PPH management on principles of treatment for shock, cause-specific PPH  
22 management and patient stabilization before referral to higher facilities.[11] India has initiated  
23 standardization of Labour Rooms (LR) under the '*Dakshata*' initiative, equipping delivery rooms to provide  
24 comprehensive care at all times. In accordance with the WHO guidelines for atonic PPH management,  
25 uterotonics remain the mainstay of treatment in India.[12] Hemodynamic stabilization and supportive

1  
2  
3 1 resuscitation measures are expected to be ongoing. Use of UBT device is recommended if uterotonic agents  
4  
5 2 fail in controlling atonic PPH bleeding. At primary level in India, all atonic PPH cases are expected to be  
6  
7 3 provided medical management and UBT intervention to stabilize and control bleeding before referral to  
8  
9 4 higher facility for observation or further interventions. Cases uncontrolled after UBT insertion at secondary  
10  
11 5 or tertiary level may require B-Lynch compression suturing, stepwise devascularization surgery (uterine,  
12  
13 6 or internal iliac artery ligation) or other procedures depending on availability of expertise and facility  
14  
15 7 infrastructure. Hysterectomy, a lifesaving procedure may be indicated after failed conservative measures or  
16  
17 8 directly after UBT insertion based on patient response. Obstetric intensive care (ICU) admission may be  
18  
19 9 needed for observation or managing complications due to PPH.

20  
21  
22  
23 10 UBT intervention for atonic PPH is a relatively simple life-saving technique that can be used even in low  
24  
25 11 resource settings with limited provisions for surgery, blood transfusion or referral mechanisms. UBT  
26  
27 12 technique is clinically effective in controlling PPH bleeding and reduces need for further surgical  
28  
29 13 interventions.[13] Timely use of UBT device can potentially be cost-saving by improving maternal  
30  
31 14 morbidity and mortality outcomes. Multiple UBT devices specifically designed, assembled or modified for  
32  
33 15 use in PPH management are available. Being economical, an assembled condom-UBT device is the  
34  
35 16 recommended standard of care (SOC) for atonic PPH management in India.[14] In the state of Maharashtra  
36  
37 17 where this study was undertaken, apart from the recommended condom-UBT device, Bakri balloon and  
38  
39 18 ESM-UBT, two ready to use sterile packed devices made available by non-governmental organizations are  
40  
41 19 used across different public health settings.[15–17] The three UBT devices have certain distinct features  
42  
43 20 giving each an advantage over the other. Literature reports varying clinical effectiveness and price for these  
44  
45 21 UBT devices. Table 1 shows distinct characteristics of these three UBT devices used in atonic PPH  
46  
47 22 management, collated from a literature review undertaken separately. (Supplemental material, Table 1.1)

50  
51 23

52  
53 24  
54  
55  
56  
57  
58  
59  
60

1 Table 1: Characteristics of UBT devices used commonly for atonic PPH management in India

| UBT device        | Cost of device                                                      | Clinical effectiveness# | Advantages                                                                                                                                                      |
|-------------------|---------------------------------------------------------------------|-------------------------|-----------------------------------------------------------------------------------------------------------------------------------------------------------------|
| Condom-UBT        | USD 2<br>(INR 128) *<br>Assembly components commercially available  | 92.3%                   | Inexpensive,<br>Assembled using available resources,<br>Modified versions are used to assess blood loss post insertion                                          |
| ESM-UBT           | USD 6<br>(INR 397).[18,19]<br>Commercially not available at present | 95.3%**                 | Relatively inexpensive,<br>Specifically designed for PPH use,<br>All components needed for assembly available in a sterile pack,<br>US-FDA approved device      |
| Bakri Balloon UBT | USD 148<br>(INR 9,554).[20]<br>Commercially available at present    | 84.3%                   | Ready to use,<br>Specifically designed for PPH use,<br>Comes in a sterile pack,<br>Has drainage outlet to measure ongoing blood loss,<br>US-FDA approved device |

2 # - Estimated from literature review of 33 studies

3 \* - Calculated using health facility purchase lists

4 \*\* - Strength of evidence is limited, based on evidence available from three case-series studies

5  
6 Under India's flagship *Pradhan Mantri Jan Arogya Yojana (PMJAY)* public health insurance scheme, a  
7 woman is entitled to cashless treatment package cost of USD 178 (INR 11,500) for high-risk vaginal  
8 deliveries and all cesarean sections. Evidence suggests that despite improved maternal outcomes with  
9 publicly sponsored schemes, extent of out-of-pocket expenditure for institutional delivery remains high

1 especially with pregnancy complications.[21] At present, the existing packages do not cover the post-  
2 partum PPH complication and there is no documented health system cost available for management of this  
3 condition. The Ministry of Health and Family Welfare (MOHFW), Government of India is assessing the  
4 most cost-effective UBT device for atonic PPH management in the public health system given the emerging  
5 evidence for relatively low cost ESM-UBT alternative.[22–24] The policy decision to make a UBT device  
6 available for PPH management across health facilities will have associated cost and health outcome  
7 implications. This study aimed to calculate public health system cost of atonic PPH management with SOC  
8 i.e. condom-UBT recommended by the 2015 Indian guidelines for PPH management with similar  
9 projections for ESM-UBT and another globally used Bakri-UBT device.[14]

10

## 11 **METHODS**

12 This costing study was part of a Health Technology Assessment (HTA) project to evaluate the most cost-  
13 effective UBT device for atonic PPH management in India. An economic costing from the health system  
14 perspective using primary bottom-up micro-costing, data from HMIS and literature review for event  
15 probabilities were used to determine and compare unit, package and annual cost of atonic PPH management  
16 with condom-UBT, ESM-UBT and Bakri balloon UBT devices in public health facilities of Maharashtra,  
17 India. The study was approved by the NIRRH Ethics Committee for Clinical Studies (Approval number:  
18 D/ICEC/Sci-29/31/2018). State health department administrative approvals and consent from respective  
19 health facility authorities were obtained before undertaking the study.

### 20 **Patient and public involvement:**

21 There was no patient or public involvement in this study design, conduct or reporting of this study and  
22 hence no consent was obtained.

### 23 **Study settings:**

1  
2  
3 1 Maternal healthcare in the Indian public system is delivered through a three-tier system. The facilities in  
4  
5 2 this study were classified depending on availability of services for atonic PPH management. Primary level  
6  
7 3 care for PPH management starts at Primary Health Centers (PHC) that are equipped with skilled birth  
8  
9 4 attendants and a medical officer. Secondary level is made by Community Health Centers (CHC) and Sub-  
10  
11 5 District Hospitals (SDH) that additionally are equipped with obstetrics-gynecology (OBGYN) specialist,  
12  
13 6 operation theater (OT) and facilities for blood transfusion. Tertiary level comprises of District Hospitals  
14  
15 7 (DH) and medical colleges having additional advanced intervention and ICU facilities.[25,26] The study  
16  
17 8 enrolled four public health facilities from the state of Maharashtra in India to ensure representation of all  
18  
19 9 three levels of care. A convenience sample of one PHC, SDH, DH, and a tertiary medical college from  
20  
21 10 Mumbai metropolitan region in Maharashtra were chosen for data collection.

#### 11 **Data collection:**

12 Cost data for one-year duration from April 2017 to March 2018 was collected by adapting a validated  
13  
14 13 standard tool developed for costing of health services in India.[27] Cost resources were broadly classified  
15  
16 14 into cost centres like human resources, infrastructure, medical equipment, non-medical equipment, drugs,  
17  
18 15 consumables and utilities like electricity, water and laundry. Data on annual quantity or facility  
19  
20 16 consumption for resources were obtained from sources like salary slips, departmental records, facility stock  
21  
22 17 reports, patient record registers, pharmacy records, indent books, bills, statements of the accounts  
23  
24 18 department, building plan of health facilities and civil department records. Source of data for each  
25  
26 19 respective costing centre is reported in Table 2. This data was complemented by facility surveys to further  
27  
28 20 collect information on infrastructure and availability of medical and non-medical equipment. Floor area  
29  
30 21 measurements were undertaken to account for area utilization across different departments of the facility.  
31  
32 22 Staff were interviewed for time allocation to assess time spent on different PPH activities as a proportion  
33  
34 23 of their total working hours. A total of 16 doctors, 26 nursing staff, 5 pharmacists and 11 technical or  
35  
36 24 administrative staff across chosen facilities were interviewed. As an example, all doctors were asked  
37  
38 25 questions pertaining to time spent on each patient for PPH specific activities and other routine tasks like  
39  
40  
41  
42  
43  
44  
45  
46  
47  
48  
49  
50  
51  
52  
53  
54  
55  
56  
57  
58  
59  
60

1  
2  
3 1 time spent in out-patient department (OPD), in-patient department (IPD), surgery, teaching, documentation  
4  
5 2 and administrative services. Time spent by the senior-most doctor in performing an obstetric hysterectomy  
6  
7 3 out of all routine tasks was used in costing obstetric hysterectomy procedure for eligible PPH cases. Time  
8  
9 4 allocation interview findings are presented in supplemental material. (Supplemental material, Table 1.2)  
10  
11  
12 5 Data on number of obstetric services like vaginal or cesarean section deliveries, number of obstetric  
13  
14 6 surgeries, hysterectomies, number of blood transfusions, in-patient admissions, emergency or obstetric ICU  
15  
16 7 admissions provided at respective facilities were obtained from available facility records like written  
17  
18 8 registers, patient record registers, electronic health records and Hospital Management Information System  
19  
20 9 (HMIS) sources. This data was collected as facility records and HMIS indicators specifically for PPH were  
21  
22 10 unavailable. To compute number of PPH services provided annually at each facility, event probability  
23  
24 11 estimates for atonic PPH incidence in Indian settings, clinical effectiveness of three UBT devices in  
25  
26 12 controlling atonic PPH bleeding (targeted literature review), probability of PPH related surgeries, its  
27  
28 13 success rate, morbidity and PPH mortality rates were obtained from published literature sources.[9,10,28–  
29  
30 14 30] Facility collected data along with India specific PPH clinical literature was used to analyze and compute  
31  
32 15 unit, package and annual cost for atonic PPH management components across healthcare levels in  
33  
34 16 Maharashtra, India.

### 37 38 17 **Data analysis:**

39  
40  
41 18 To determine PPH events occurring at facility level, PPH incidence rates in vaginal and cesarean section  
42  
43 19 deliveries were applied to facility reported deliveries to determine number of atonic PPH cases expected  
44  
45 20 annually at the given facility. Proportion of atonic PPH cases uncontrolled after medical management  
46  
47 21 determined number of beneficiaries eligible for UBT insertion at the facility. Clinical effectiveness  
48  
49 22 parameters for each individual UBT device derived from literature review determined requirement of  
50  
51 23 subsequent type and number of surgeries with each individual UBT expected at the healthcare level.  
52  
53 24 Supplemental material provides PPH parameters obtained from literature along with computed number of  
54  
55 25 services specific to facilities used in cost calculation. (Supplemental material, Table 1.3, Table 1.4)

1  
2  
3 1 Monetary value obtained from sources like salary slips, department records for human resources, civil  
4  
5 2 department records for area, facility records for drugs and equipment, and departmental records, facility  
6  
7 3 registers and bills for utilities were respectively attached to collected quantity of each resource utilized  
8  
9 4 across cost centers. For cost analysis, resources were classified into capital and recurrent items. Capital  
10  
11 5 resources were annualized using the India recommended 3% discount rate and factoring in life expectancy  
12  
13 6 and annual maintenance rate of items.[31] Overall cost for services provided at the facility across cost  
14  
15 7 centers was apportioned specific to atonic PPH management component by considering time or proportion  
16  
17 8 calculated for atonic PPH activity being costed, number of total activities under the same category  
18  
19 9 performed at facility and applying standard apportioning methods based on shared or exclusive nature of  
20  
21 10 service utilization.[32] Human resource salaries were apportioned based on time allocation interviews for  
22  
23 11 a given atonic PPH activity out of total working hours for all services provided. Area was apportioned based  
24  
25 12 on proportional time spent for an atonic PPH activity in the given area out of all activities taking place in  
26  
27 13 the same area. Drugs and consumables were apportioned as a proportion of utilization for number of PPH  
28  
29 14 cases out of utilization for all treated patients. Medical and non-medical equipment were first annualized  
30  
31 15 and then apportioned as the proportion of time used specifically for the given PPH activity out of all  
32  
33 16 activities. Utilities like water and electricity were apportioned proportionally to floor area occupied for a  
34  
35 17 particular service. Table 2 provides apportioning methods and corresponding data sources used in cost  
36  
37 18 calculation. Supplemental material provides an example of apportioning methods and assumptions used in  
38  
39 19 cost calculation. Worksheets were developed for cost calculation of each component at each facility  
40  
41 20 followed by weighted aggregation of costs to the level of care individually for each UBT type. For example,  
42  
43 21 unit condom-UBT insertion cost at DH and medical college was aggregated to get a unit condom-UBT  
44  
45 22 insertion cost for tertiary level. All costs are presented in United States Dollars (USD) and Indian National  
46  
47 23 Rupee (INR) currency. A conversion rate of 1 USD = 64.5 INR for the year 2017-18 was used.[33] Data  
48  
49 24 was analyzed using Microsoft Excel 2016.  
50  
51  
52  
53  
54  
55 25  
56  
57  
58  
59  
60

1 Table 2: Costing assumptions and apportioning

| Cost center                            | Source of data                                                                   | Numerator                                                                                                                 | Denominator                                           |
|----------------------------------------|----------------------------------------------------------------------------------|---------------------------------------------------------------------------------------------------------------------------|-------------------------------------------------------|
| Human resource cost                    | Salary slips, departmental records, time allocation interview                    | Proportional cost for time spent on specific component of atonic PPH management                                           | Total working hours                                   |
| Area cost                              | Facility survey, civil department records                                        | Proportional cost for time spent on spent on specific component of atonic PPH management                                  | Total time spent in the given facility area           |
| Drug and consumable cost               | Facility stock reports, indent books, patient record registers, pharmacy records | Proportional cost for number of patients requiring drugs and consumable for a specific component of atonic PPH management | Total number of cases accessing drugs and consumables |
| Medical and non-medical equipment cost | Facility observations, facility stock reports,                                   | Proportional cost for time spent on specific component of atonic PPH management                                           | Total working hours                                   |
| Electricity                            | Facility survey, departmental records, electricity bills                         | Proportional cost for time spent on specific component of atonic PPH management                                           | Total working hours                                   |
| Water                                  | Departmental records, water bills                                                | Proportional cost of area required for specific component of atonic PPH management                                        | Total facility area                                   |
| Laundry                                | Departmental records, facility registers                                         | Proportional cost for atonic PPH patients requiring laundry                                                               | Total number of indoor patients at the facility       |



1  
2  
3 1  
4  
56 2 Unit costs  
7

8  
9 3 Unit costs were calculated for each component of atonic PPH management expected at the respective  
10 4 healthcare level. This included cost of medical management for atonic PPH, UBT insertion for refractory  
11 5 cases, devascularization surgery, hysterectomy, IPD admission, ICU admission and cost of patient referral  
12 6 at respective levels. Denominators like number of atonic PPH cases, number of UBT eligible beneficiaries,  
13 7 number of referrals, number of consequential conservative or obstetric hysterectomy surgeries determined  
14 8 from collected data sources along with apportioned facility cost across cost centers was used to compute  
15 9 per beneficiary unit cost for the identified component of atonic PPH management. Unit cost of UBT  
16 10 insertion included the cost of UBT device. Unit cost for medical management, referral and IPD admission  
17 11 were expected to remain unaffected irrespective of the type of the UBT device used. For these services,  
18 12 costs were calculated only for SOC i.e., management with condom-UBT device.  
19  
20  
21  
22  
23  
24  
25  
26  
27  
28  
29

30 13 Package costs  
31  
32

33 14 To account for treatment combinations used in management of atonic PPH, treatment package costs were  
34 15 determined. For a certain treatment, package cost was calculated by adding unit cost associated with all  
35 16 treatment components for management at respective healthcare level. For all patients at primary and  
36 17 secondary care requiring transport, referral costs were added to get package costs.  
37  
38  
39  
40  
41

42 18 Annual costs  
43  
44

45 19 Unit and package cost calculation was followed by annual health system cost estimation for an annual  
46 20 cohort of women in Maharashtra experiencing atonic PPH after delivering in public healthcare facilities.  
47 21 Number of deliveries occurring across the three respective public healthcare levels in Maharashtra were  
48 22 combined with respective PPH service utilization units to get pooled annual cost for a given service. Overall  
49 23 annual health system cost was then estimated by combining annual health system cost of medical  
50 24 management, further course of interventions using UBT device in uncontrolled cases and training cost for  
51  
52  
53  
54  
55  
56  
57  
58  
59  
60

1 UBT. Unit cost for every treatment component at each facility was first aggregated to primary, secondary  
2 and tertiary level and then applied to the annual eligible population cohort in Maharashtra to estimate annual  
3 costs with each UBT device.

4 Certain methodological assumptions were made during cost analysis. It was assumed that for a particular  
5 UBT device, all eligible atonic PPH cases would receive only that particular UBT across facilities. It was  
6 assumed that at primary level, all women after medical management or UBT insertion would immediately  
7 be referred for secondary care. Unit calculated cost for per day IPD or ICU admission of patients at chosen  
8 facilities were apportioned to literature based atonic PPH length of stay to estimate IPD and ICU costs for  
9 atonic PPH management.[34–36] Cost of blood transfusion and other resuscitation measures were  
10 incorporated in unit costs throughout management and are not calculated separately. Training costs were  
11 estimated for one day training of healthcare providers.[37] Due to time and resource limitation for primary  
12 estimation of PPH referral costs, an inflation adjusted cost of USD 15.5 (INR 1,001) per case was used  
13 from a published Indian primary economic costing study that calculated public health system cost of  
14 transportation for institutional delivery services in three districts of an Indian state.[38] B-Lynch suturing  
15 and stepwise devascularization surgery in this study were considered as a single unit for cost calculation.

16 Probabilistic sensitivity analysis was used to address joint uncertainty effect of input parameters on costs.  
17 A beta distribution for probabilities and proportions, gamma distribution for cost and resource use was  
18 assigned to vary parameters on both sides. As drugs and consumables are procured by the government at a  
19 negotiated price whereas market prices show variation on the higher side, these were varied by 50% and  
20 100% on lower and upper limits respectively. UBT device price was assumed to vary by 50% on both sides.  
21 Remaining parameters such as salaries, rental prices, medical and non-medical equipment, utilities and  
22 utilization of services were varied by 25%.[39] Monte Carlo simulations were run to obtain 1000 unit cost  
23 estimates. These estimates were used to determine 95% confidence interval (CI) limits for all reported costs.

24

## 1 RESULTS

2 The chosen sample of four public health facilities from Maharashtra reported 7,208 vaginal and 2,516  
3 cesarean section deliveries in the year 2017-18. Of the 9,724 total deliveries, 293 women were expected to  
4 experience atonic PPH. Twenty-nine out 293 cases would remain uncontrolled after medical management,  
5 thus becoming eligible for UBT device insertion. Further depending on clinical effectiveness of individual  
6 UBT device in controlling bleeding, remaining cases undergo surgical intervention depending on  
7 infrastructure and resource availability at respective clinical setting.

### 8 Unit costs:

9 Medical treatment of atonic PPH cases costs the health system USD 0.7 (INR 42), USD 5 (INR 322) and  
10 USD 9.4 (INR 609) per patient at primary, secondary and tertiary levels respectively. For uncontrolled  
11 cases requiring further intervention, condom-UBT (SOC) insertion costs USD 2.5 (INR 160), USD 5.3  
12 (INR 339) and USD 6.5 (INR 422) at the three respective levels. Devascularization group of surgery for  
13 uncontrolled cases after condom-UBT insertion costs USD 75.4 (INR 4864) per case at secondary and USD  
14 53.0 (INR 3,419) per case at tertiary level. Similarly, hysterectomy procedure costs USD 120.6 (INR 7,782)  
15 per case at secondary and USD 84.8 (INR 5,471) at tertiary level. Table 3 provides the health system unit  
16 costs with condom-UBT, ESM-UBT and Bakri-UBT. IPD admission for an atonic PPH case costs the health  
17 system USD 27.5 (INR 1,776) per patient at secondary and USD 28.0 (INR 1,806) per patient at tertiary  
18 level. ICU admission at tertiary facility costs the health system USD 76.0 (INR 4,902) per patient getting  
19 admitted for atonic PPH management. One-time training of medical officers and OBGYN specialists across  
20 public health facilities of Maharashtra costs USD 12.1 (INR 778) per eligible case of UBT device insertion.

1 Table 3: Unit costs for atonic PPH management components across public health facility levels in  
 2 Maharashtra, India [1 USD = 64.5 INR]

|                                                                        | Medical management | UBT insertion          | Devascularization    | Hysterectomy          | Inpatient Admission | ICU admission        |
|------------------------------------------------------------------------|--------------------|------------------------|----------------------|-----------------------|---------------------|----------------------|
| Per patient unit cost with Condom-UBT in USD (95% Confidence interval) |                    |                        |                      |                       |                     |                      |
| Primary                                                                | 0.7<br>(0.4-0.9)   | 2.5<br>(1.5-3.5)       | NA                   | NA                    | NA                  | NA                   |
| Secondary                                                              | 5.0<br>(3.5-6.6)   | 5.3<br>(4.1-6.5)       | 75.4<br>(49.4-104.4) | 120.6<br>(77.9-168.2) | 27.5<br>(16.8-39.5) | NA                   |
| Tertiary                                                               | 9.4<br>(6.7-12.6)  | 6.5<br>(5.3-7.9)       | 53.0<br>(41.9-64.4)  | 84.8<br>(66.3-104.4)  | 28.0<br>(20.7-35.9) | 75.9<br>(50.3-104.6) |
| Per patient unit cost with ESM-UBT in USD (95% Confidence interval)    |                    |                        |                      |                       |                     |                      |
| Primary                                                                | 0.7<br>(0.4-0.9)   | 6.7<br>(3.6-9.9)       | NA                   | NA                    | NA                  | NA                   |
| Secondary                                                              | 5.0<br>(3.5-6.6)   | 8.8<br>(5.9-11.6)      | 56.9<br>(37.1-79.0)  | 119.9<br>(79.3-162.7) | 27.5<br>(16.8-39.5) | NA                   |
| Tertiary                                                               | 9.4<br>(6.7-12.6)  | 10.4<br>(8.5-12.5)     | 51.7<br>(40.6-63.7)  | 86.5<br>(68.0-107.1)  | 28.0<br>(20.7-35.9) | 75.9<br>(50.3-104.6) |
| Per patient unit cost with Bakri-UBT in USD (95% Confidence interval)  |                    |                        |                      |                       |                     |                      |
| Primary                                                                | 0.7<br>(0.4-0.9)   | 148.6<br>(74.3-219.0)  | NA                   | NA                    | NA                  | NA                   |
| Secondary                                                              | 5.0<br>(3.5-6.6)   | 151.1<br>(88.0-214.8)  | 76.8<br>(51.2-103.9) | 119.7<br>(80.1-165.4) | 27.5<br>(16.8-39.5) | NA                   |
| Tertiary                                                               | 9.4<br>(6.7-12.6)  | 153.1<br>(113.0-191.8) | 53.0<br>(41.6-64.7)  | 84.8<br>(67.2-103.7)  | 28.0<br>(20.7-35.9) | 75.9<br>(50.3-104.6) |

1  
2  
3 1  
4  
5  
6 2  
7  
8  
9 3  
10 4  
11 5  
12 6  
13 7  
14 8  
15 9  
16 10  
17 11  
18 12  
19 13  
20 14  
21 15  
22 16  
23 17  
24 18  
25 19  
26 20  
27 21  
28 22  
29 23  
30 24  
31 25  
32 26  
33 27  
34 28  
35 29  
36 30  
37 31  
38 32  
39 33  
40 34  
41 35  
42 36  
43 37  
44 38  
45 39  
46 40  
47 41  
48 42  
49 43  
50 44  
51 45  
52 46  
53 47  
54 48  
55 49  
56 50  
57 51  
58 52  
59 53  
60 54

**Package cost:**

Of the eligible cases, condom-UBT successfully controls 92.3% cases after device insertion and ongoing medical and resuscitation measures. This combination treatment costs the health system a total of USD 46.2 (INR 2,979), USD 37.8 (INR 2,437) and USD 44.0 (INR 2,838) at three respective levels. This treatment package comprises costs of medical management, UBT insertion, IPD admission and additional referral cost for primary care patients. Treatment package cost of control with devascularization surgery after condom-UBT insertion and medical treatment has a total health system cost of USD 113.2 (INR 7,301) and USD 97.0 (INR 6,256) per patient at secondary and tertiary levels respectively. Similarly, a direct hysterectomy for uncontrolled atonic PPH after UBT insertion costs USD 158.4 (INR 10,218) and USD 128.8 (INR 8,308) at secondary and tertiary levels respectively. Less than 4% of the uncontrolled atonic PPH cases with condom-UBT insertion are expected to require ICU facility for atonic PPH management. Health system package costs for such treatment combinations can be derived from the given unit cost table. Alternatively, if ESM or Bakri-UBT device is used in controlling atonic PPH, package cost varies on account of device effectiveness and associated resource use. Table 4 lists treatment package cost estimates for atonic PPH management with three UBT devices.

1  
2  
3 Table 4: Treatment package cost for atonic PPH management across public healthcare levels in  
4  
5  
6 2 Maharashtra, India [1 USD = 64.5 INR] (95% Confidence interval)  
7

|                                                                                                                             | Condom UBT             | ESM UBT                | Bakri UBT              |
|-----------------------------------------------------------------------------------------------------------------------------|------------------------|------------------------|------------------------|
| Package cost for atonic PPH controlled after UBT insertion in USD<br>(95% Confidence interval)                              |                        |                        |                        |
| Primary                                                                                                                     | 46.2<br>(34.9-59.1)    | 50.4<br>(38.5-63.8)    | 192.3<br>(153.8-230.8) |
| Secondary                                                                                                                   | 37.8<br>(28.5-48.3)    | 41.3<br>(31.9-52.0)    | 184.1<br>(147.0-222.4) |
| Tertiary                                                                                                                    | 43.9<br>(35.4-53.3)    | 47.9<br>(39.6-57.0)    | 190.5<br>(149.9-233.2) |
| Package cost for atonic PPH controlled with devascularization surgery after UBT failure in USD<br>(95% Confidence interval) |                        |                        |                        |
| Secondary                                                                                                                   | 113.2<br>(103.2-123.8) | 98.2<br>(88.5-108.7)   | 260.9<br>(218.6-304.2) |
| Tertiary                                                                                                                    | 96.9<br>(88.7-106.3)   | 99.6<br>(91.4-109.3)   | 243.5<br>(202.2-286.9) |
| Package cost for atonic PPH controlled with direct hysterectomy after UBT failure in USD<br>(95% Confidence interval)       |                        |                        |                        |
| Secondary                                                                                                                   | 158.4<br>(149.6-168.9) | 161.1<br>(152.1-171.7) | 303.8<br>(256.0-355.6) |
| Tertiary                                                                                                                    | 128.8<br>(120.5-138.6) | 134.4<br>(126.2-144.0) | 275.3<br>(231.2-319.1) |

3

4

1  
2  
3 **1 Annual costs:**  
4  
5

6 2 Annual cost to the public health system was estimated for managing 27,915 women experiencing atonic  
7  
8 3 PPH annually out of the 969,264 deliveries reported by the state of Maharashtra for the year 2017-18.[40]  
9  
10 4 The estimated annual cost of medical management for atonic PPH was USD 1,032,647 (INR 6,66,05,750)  
11  
12 5 or USD 36.9 (INR 2,386) per atonic PPH patient. Additionally, 2,791 women were estimated to require  
13  
14 6 UBT intervention followed by devascularization surgery, hysterectomy or ICU facility for uncontrolled  
15  
16 7 cases. The annual cost of managing these uncontrolled cases in public health facilities of Maharashtra, India  
17  
18 8 is USD 193,963 (INR 1,25,10,610) with condom-UBT, USD 188,090 (INR 1,21,31,800) with ESM-UBT  
19  
20 9 and USD 620,297 (INR 4,00,09,169) with Bakri-UBT when used for medically uncontrolled atonic PPH  
21  
22 10 cases. This corresponds to a per eligible beneficiary cost of USD 69.5 (INR 4,482) for control with condom-  
23  
24 11 UBT and subsequent interventions, USD 67.4 (INR 4,346) for ESM-UBT and USD 222.2 (INR 14,333)  
25  
26 12 for Bakri-UBT respectively. Overall, the health system incurs a per atonic PPH patient treatment cost of  
27  
28 13 USD 43.9 (INR 2,834) with condom-UBT, USD 43.7 (INR 2,820) with ESM-UBT and USD 59.2 (INR  
29  
30 14 3,819) per case with Bakri-UBT if made available for atonic PPH management in Maharashtra, India. Table  
31  
32 15 5 describes the annual health system cost of atonic PPH management in Maharashtra, India.  
33  
34  
35  
36  
37  
38  
39  
40  
41  
42  
43  
44  
45  
46  
47  
48  
49  
50  
51  
52  
53  
54  
55  
56  
57  
58  
59  
60

1  
2  
3 Table 5: Annual public health system cost of managing atonic PPH using three UBT devices in  
4  
5  
6  
7  
8  
9  
10  
11  
12  
13  
14  
15  
16  
17  
18  
19  
20  
21  
22  
23  
24  
25  
26  
27  
28  
29  
30  
31  
32  
33  
34  
35  
36  
37  
38  
39  
40  
41  
42  
43  
44  
45  
46  
47  
48  
49  
50  
51  
52  
53  
54  
55  
56  
57  
58  
59  
60

1 Table 5: Annual public health system cost of managing atonic PPH using three UBT devices in  
2 Maharashtra, India [1 USD = 64.5 INR] (95% Confidence interval)

| Cost center                                                                                          | Condom-UBT<br>USD (95% CI)      | ESM-UBT<br>USD (95% CI)         | Bakri-UBT<br>USD (95% CI)        |
|------------------------------------------------------------------------------------------------------|---------------------------------|---------------------------------|----------------------------------|
| Annual atonic PPH medical management cost (a)                                                        | 1,032,647<br>(688893 – 1375716) |                                 |                                  |
| Annual UBT training cost (b)                                                                         | 34,109<br>(25817 – 42579)       |                                 |                                  |
| Annual cost for uncontrolled atonic PPH cases managed with UBT device and surgical interventions (c) | 193,963<br>(152,772 – 232,481)  | 188,090<br>(150393 – 226901)    | 620,297<br>(386981 – 857415)     |
| Total annual cost of atonic PPH management (a + b + c)                                               | 1,226,610<br>(870250 – 1581596) | 1,220,737<br>(876187 – 1566385) | 1,652,944<br>(1224827 – 2061670) |
| Annual UBT device cost                                                                               | 5,540<br>(2362 – 8664)          | 17,182<br>(7324 – 26770)        | 413,485<br>(180,326 – 652,695)   |
| Per patient cost of medical management for atonic PPH                                                | 36.9<br>(29-45)                 |                                 |                                  |
| Per patient cost of managing uncontrolled atonic PPH cases with UBT and surgical interventions       | 69.5<br>(47 – 94)               | 67.4<br>(47 – 88)               | 222.2<br>(145 – 299)             |
| Per patient health system cost of atonic PPH management                                              | 43.9<br>(36 – 53)               | 43.7<br>(35 – 52)               | 59.2<br>(46 – 73)                |

3



1  
2  
3 1  
4  
56 2 **DISCUSSION**  
7

8  
9 3 To our knowledge, this is the first study comprehensively assessing public health system costs associated  
10 4 with atonic PPH management in India. A study conducted in Myanmar at a 25 bedded hospital reported  
11 5 cost of PPH management along with other obstetric complications.[41] Similarly, an Egypt study reported  
12 6 estimates of direct health system costs for different procedures used in PPH management in two district  
13 7 hospitals.[42] Our study specifically estimates health system cost of managing atonic PPH across healthcare  
14 8 levels in the Indian public health system using primary cost data. This paper focuses on estimating the cost  
15 9 of using different uterine balloon tamponade devices given their varying reported clinical effectiveness in  
16 10 controlling atonic PPH bleeding. Additionally, we have undertaken costing of medical management, and  
17 11 surgical intervention subsequent to failed UBT treatment across public healthcare levels of India.

18  
19 12 Our analysis reported a total cost of USD 43.9 (95% CI 36-53) per atonic PPH patient with condom-UBT,  
20 13 USD 43.7 (95% CI 35–52) with ESM-UBT and USD 59.2 (95% CI 46-73) with Bakri-UBT use in  
21 14 Maharashtra's public health system for the year 2017-18. The study from Myanmar reported an inflation  
22 15 adjusted unit cost of USD 28 ( $\pm 1.61$ ) per case for managing PPH in their hospital study setting.[43] The  
23 16 Egypt study reported an adjusted treatment cost of USD 110 per case for PPH but reported use of UBT  
24 17 intervention in 3.9% cases as compared to 9.9% in our study. As primary data was not available, the  
25 18 assumption that all those needing UBT intervention would receive it may be one of the reasons for lower  
26 19 unit costs in our study as UBT intervention would reduce subsequent surgical interventions. Neither of the  
27 20 two studies reported UBT intervention costs specifically.

28  
29 21 The unit cost of medical management for an atonic PPH case in our study was USD 36.9 (INR 2,386). Unit  
30 22 cost of UBT device insertion increased gradually with higher facility level and was dominated by the cost  
31 23 of UBT device itself. Treatment package costs for UBT insertion at primary level included referral cost and  
32 24 hence reported higher costs as compared to secondary or tertiary level. Unit and package costs for surgical

1 intervention subsequent to UBT failure was found to be higher at secondary level as compared to tertiary  
2 level in our study. Tertiary level hysterectomy cost at USD 84.8 (INR 5,471) per case in our study is in  
3 similar range as reported by another Indian study at an adjusted cost of USD 95.7 (INR 6174) for a district  
4 hospital.[44] Likewise, stepwise devascularization surgery in the Egypt study reported an adjusted cost of  
5 USD 62 per case is in the similar range to those reported in our findings. Unit and package surgical costs  
6 in our study also varied depending on clinical effectiveness of the UBT device affecting consumption of  
7 facility resources. Cost of condom-UBT device in Indian public health facilities was USD 1.9 (INR 128),  
8 one-third the price of ESM-UBT device. Bakri balloon at a market price of USD 148 (INR 9554) in India,  
9 costs significantly higher in comparison to the other two devices. Bakri-UBT at a higher price and lower  
10 reported clinical effectiveness in controlling atonic PPH, accounted for higher unfavorable unit and package  
11 costs in our analysis. ESM-UBT reported a marginally higher clinical effectiveness but had a three-time  
12 higher device cost as compared to condom-UBT. The unit cost however for both condom and ESM-UBT  
13 was similar at USD 43.9 (INR 2,834) and USD 43.7 (INR 2820).

14 Cost of medical management for atonic PPH across healthcare levels in this study constitutes a major  
15 component of the annual costs (84.2% for Condom-UBT, 84.6% for ESM-UBT and 62.5% for Bakri-UBT).  
16 This is expected as majority patients are controlled with uterotonics and supportive measures. Remaining  
17 portion of annual costs are accounted by UBT and subsequent interventions for uncontrolled cases (15.8%  
18 for condom-UBT, 15.4% for ESM-UBT and 37.5% for Bakri-UBT). Both condom and ESM-UBT have  
19 lower unit, package and annual costs as compared to Bakri-UBT. However, the strength of clinical  
20 effectiveness evidence available for ESM-UBT at the time of this study was limited to a few case series  
21 studies reporting survival rates.[19,22,23]. Cost implication of using ESM-UBT device would vary if higher  
22 quality of clinical effectiveness evidence across UBT devices along with procurement cost of equipping all  
23 Indian public health facilities with a particular device is made available. Cost of UBT device accounted to  
24 0.5% of the annual health system costs for condom-UBT, 1.4% for ESM-UBT and 25% for Bakri-UBT  
25 respectively.

1  
2  
3 1 The state of Maharashtra in the year 2017-18 spent an estimated USD 1,226,610 (INR 7,91,16,359) by  
4  
5 2 catering to all atonic PPH cases in public health facilities with condom-UBT intervention as per the  
6  
7 3 recommended treatment guidelines. Alternatively, if ESM-UBT or Bakri Balloon was available, the state  
8  
9 4 would spend USD 1,220,737 (INR 7,87,37,549) or USD 1,652,944 (INR 10,66,14,919) respectively. Atonic  
10  
11 5 PPH management with condom-UBT in Maharashtra thus accounted to 3.8% of the annual state spending  
12  
13 6 on reproductive and child health (RCH) activities in the year 2017-18.[45,46] ESM-UBT would account to  
14  
15 7 a similar 3.8% whereas Bakri-UBT for atonic PPH management would account to a higher 5.2% proportion  
16  
17 8 of the state's annual RCH spending.

18  
19  
20  
21 9 This study empirically derived costs of atonic PPH management across public healthcare levels for a state  
22  
23 10 in India. The WHO guideline development group has identified use of uterine balloon tamponade in PPH  
24  
25 11 as a research priority.[47] Our study provides economic evidence for equipping health systems with the  
26  
27 12 choice of a clinically effective UBT intervention that is affordable and suitable for low resource settings  
28  
29 13 like India. Findings of this study can be used to optimize efficiency by improving financial allocation within  
30  
31 14 the health system. Under the revised *Janani Shishu Suraksha Karyakaram* (JSSK) scheme in India,  
32  
33 15 pregnant women accessing public health facilities are entitled to free treatment for childbirth and pregnancy  
34  
35 16 complications.[48] Implementation under the *PMJAY* scheme has revised high risk and caesarean section  
36  
37 17 delivery package costs to USD 178 (INR 11,500). This package is inclusive of drugs, diagnostics,  
38  
39 18 consultations, procedures, stay and food for the patient availing care.[49] The results from our study can be  
40  
41 19 used to address package costs for the post-partum PPH complication across different publicly financed  
42  
43 20 health schemes to avoid any financial burden on the beneficiaries as reported with institutional deliveries  
44  
45 21 in India.[21]

## 22 **Limitations:**

23 The study bases its cost findings from one region of Maharashtra by collecting data from sample facilities  
24 across healthcare levels. Given the differences within districts across the state, provisioning and utilization  
25 of healthcare services vary on account of socio-economic, epidemiologic and other contextual factors.

1  
2  
3 1 Although we have undertaken uncertainty analysis to address these factors to an extent, generalizability of  
4  
5 2 the study results across states of India may be difficult. For analysis, it was assumed that all atonic PPH  
6  
7 3 cases requiring UBT intervention will receive it and a uniform UBT device would be available across all  
8  
9 4 facilities. However, in practice this might differ resulting in deviation of cost estimates from those reported.  
10  
11 5 Facility level disaggregated HMIS data on PPH and corresponding service utilization was not available, so  
12  
13 6 we had to rely on literature-based probabilities to derive PPH service utilization for costing.  
14  
15  
16  
17  
18

## 19 8 **CONCLUSION**

20  
21  
22 9 The study provides health system cost of managing atonic PPH complication in Indian public health  
23  
24 10 settings. Policy makers can use these findings to include the clinical condition of PPH to treatment benefit  
25  
26 11 packages under publicly financed health schemes and to inform budgetary allocations to equip the Indian  
27  
28 12 health system with a suitable UBT choice. Economic evaluation studies can use this evidence to determine  
29  
30 13 the most cost-effective UBT choice for Indian settings. In addition to equipping facilities and supply lines  
31  
32 14 with the right commodities, programs must optimize performance of the healthcare providers and ensure  
33  
34 15 efficient referral systems are in place to save a woman's life.  
35  
36  
37  
38  
39  
40  
41  
42  
43  
44  
45  
46  
47  
48  
49  
50  
51  
52  
53  
54  
55  
56  
57  
58  
59  
60

## 1 **Acknowledgements**

2 We acknowledge the support provided by the Department of Health Research (DHR), MOHFW,  
3 Government of India. We are grateful to Dr. Dinesh Baswal (Deputy Commissioner Maternal Health  
4 Division, MOHFW, India) for suggesting the topic to HTAIn and Dr. Smita Mahale (Director, NIRRH-  
5 ICMR, Mumbai, India) for her encouragement and support. We acknowledge the technical support  
6 provided by HTAIn, DHR and the project staff at the institute. We are grateful for the inputs provided by  
7 experts Dr. Niranjana Maydeo (Professor and Head, Department of Obstetrics and Gynecology, King  
8 Edward Memorial Hospital, Mumbai, India), Mr. Pankaj Bahuguna (Economic Evaluation Specialist,  
9 School of Public Health, PGIMER), Dr. Anushree Patil (Scientist E, Clinical Research, NIRRH-ICMR,  
10 Mumbai, India), Dr. Amita Pandey (Professor, Department of Obstetrics and Gynecology, King George's  
11 Medical University, Lucknow, India), Dr. Vanita Suri (Professor and Head, Department of Obstetrics and  
12 Gynecology, Postgraduate Institute of Medical Education and Research, Chandigarh, India) and Dr. Amit  
13 Patel (Program Director, Jivdaya Foundation, Texas, United States of America)

## 14 **Author Contributions**

15 BJ, SS and KM were responsible for conceptualization and design of the study. KM and HC undertook data  
16 collection. SS and KM analyzed the data. BJ checked the analysis and edited the manuscript. SS was  
17 responsible for the first draft and all authors contributed to further revisions. All authors read and approved  
18 the final manuscript.

## 19 **Funding statement**

20 This work was supported by HTAIn, Department of Health Research, Ministry of Health and Family  
21 Welfare, Government of India grant number T.11011/02/2017-HR

## 22 **Competing interests**

23 None declared

1  
2  
3  
4  
5  
6  
7  
8  
9  
10  
11  
12  
13  
14  
15  
16  
17  
18  
19  
20  
21  
22  
23  
24  
25  
26  
27  
28  
29  
30  
31  
32  
33  
34  
35  
36  
37  
38  
39  
40  
41  
42  
43  
44  
45  
46  
47  
48  
49  
50  
51  
52  
53  
54  
55  
56  
57  
58  
59  
60

1 **Patient consent**

2 Not required

3 **Data sharing statement**

4 All unpublished data are available upon reasonable request to the corresponding author BJ through E-mail

5

For peer review only

## REFERENCES

- 1  
2  
3  
4  
5  
6  
7 1 1 Onarheim KH, Iversen JH, Bloom DE. Economic benefits of investing in women's health: A  
8 2 systematic review. *PLoS One*. 2016;**11**:1–23. doi:10.1371/journal.pone.0150120
- 9  
10 3 2 Amiri A, Gerdtham U. Impact of maternal and child health on economic growth: New evidence  
11 4 based granger causality and DEA analysis. *Partnersh Matern Newborn Child Heal (PMNCH),*  
12 5 *World Heal Organ* 2013;:1–  
13 6 30.[http://www.who.int/pmnch/topics/part\\_publications/201303\\_Econ\\_benefits\\_econometric\\_study](http://www.who.int/pmnch/topics/part_publications/201303_Econ_benefits_econometric_study.pdf)  
14 7 .pdf
- 15  
16 8 3 Registrar General of India. SPECIAL BULLETIN ON MATERNAL MORTALITY IN INDIA  
17 9 2015-17 SAMPLE REGISTRATION SYSTEM OFFICE OF REGISTRAR GENERAL, INDIA.  
18 10 2019. <http://www.censusindia.gov.in> (accessed 15 Apr 2020).
- 19  
20 11 4 Singh PK. India has achieved groundbreaking success in reducing maternal mortality. WHO Reg.  
21 12 Off. South-East Asia. 2016;:2016.[https://www.who.int/southeastasia/news/detail/10-06-2018-](https://www.who.int/southeastasia/news/detail/10-06-2018-india-has-achieved-groundbreaking-success-in-reducing-maternal-mortality)  
22 13 [india-has-achieved-groundbreaking-success-in-reducing-maternal-mortality](https://www.who.int/southeastasia/news/detail/10-06-2018-india-has-achieved-groundbreaking-success-in-reducing-maternal-mortality) (accessed 15 Apr  
23 14 2020).
- 24  
25 15 5 DGHS. National Health Profile 2018 13 th Issue. 2018. [www.who.int/classifications](http://www.who.int/classifications)
- 26  
27 16 6 The World Bank. Number of maternal deaths | Data.  
28 17 2015.[https://data.worldbank.org/indicator/SH.MMR.DTHS?most\\_recent\\_value\\_desc=true](https://data.worldbank.org/indicator/SH.MMR.DTHS?most_recent_value_desc=true)  
29 18 (accessed 15 Apr 2020).
- 30  
31 19 7 Welfare F. Health and Family Welfare Statistics in India 2017. 2017.
- 32  
33 20 8 Say L, Chou D, Gemmill A, *et al*. Global causes of maternal death: A WHO systematic analysis.  
34 21 *Lancet Glob Heal* 2014;**2**:323–33. doi:10.1016/S2214-109X(14)70227-X
- 35  
36 22 9 Rastogi A, Zahid. Postpartum haemorrhage | National Health Portal Of India. Natl. Heal. Portal  
37 23 India. 2017.<https://www.nhp.gov.in/disease/gynaecology-and-obstetrics/postpartum-haemorrhage>  
38 24 (accessed 15 Jun 2020).
- 39  
40 25 10 Dutta D. *Textbook of Obstetrics*. 2015.
- 41  
42 26 11 Guidelines- MH :: National Health Mission.  
43 27 <https://nhm.gov.in/index1.php?lang=1&level=3&sublinkid=839&lid=377> (accessed 8 Jun 2020).
- 44  
45 28 12 Dept. of Reproductive Health and Research W. WHO recommendations for the prevention and  
46 29 treatment of postpartum haemorrhage. 2012. [www.who.int/maternal\\_child\\_adolescent](http://www.who.int/maternal_child_adolescent) (accessed 5  
47 30 Feb 2020).
- 48  
49 31 13 Suarez S, Conde-Agudelo A, Borovac-Pinheiro A, *et al*. Uterine balloon tamponade for the  
50 32 treatment of postpartum hemorrhage: a systematic review and meta-analysis. *Am J Obstet Gynecol*  
51 33 Published Online First: 2020. doi:10.1016/j.ajog.2019.11.1287
- 52  
53 34 14 Division MH, Welfare F. Guidance Note on Prevention and Management of Postpartum  
54 35 Haemorrhage. 2015;:1–28.
- 55  
56 36 15 Maternal Health — Jiv Daya Foundation. <https://www.jivdayafound.org/maternal-health> (accessed  
57 37 3 Jun 2020).
- 58  
59 38 16 MGIMS, Govt of India, NHSRC and Harvard discuss PPH management.

1  
2  
3  
4  
5  
6  
7  
8  
9  
10  
11  
12  
13  
14  
15  
16  
17  
18  
19  
20  
21  
22  
23  
24  
25  
26  
27  
28  
29  
30  
31  
32  
33  
34  
35  
36  
37  
38  
39  
40  
41  
42  
43  
44  
45  
46  
47  
48  
49  
50  
51  
52  
53  
54  
55  
56  
57  
58  
59  
60

- <https://www.mgims.ac.in/index.php/component/easyblog/392-govt-of-india-discusses-the-management-of-pph-at-mgims?Itemid=1> (accessed 3 Jun 2020).
- 17 'Harvard' helps State's 11 medical colleges to reduce maternal deaths due to PPH - The Hitavada. <https://www.thehitavada.com/Encyc/2020/3/3/-Harvard-helps-State-s-11-medical-colleges-to-reduce-maternal-deaths-due-to-PPH.html> (accessed 3 Jun 2020).
- 18 Massachusetts General Hospital. Every Second Matters for Mothers and Babies - Uterine Balloon Tamponade for Postpartum Hemorrhage. Massachusetts Gen. Hosp. Emerg. Med. 2018. <https://www.massgeneral.org/emergency-medicine/global-health/initiatives-and-programs/every-second-matters-for-mothers-and-babies-uterine-balloon-tamponade-for-postpartum-hemorrhage> (accessed 20 Jul 2020).
- 19 Burke TF, Ahn R, Nelson BD, *et al.* A postpartum haemorrhage package with condom uterine balloon tamponade: a prospective multi-centre case series in Kenya, Sierra Leone, Senegal, and Nepal. *BJOG An Int J Obstet Gynaecol* 2016;**123**:1532–40. doi:10.1111/1471-0528.13550
- 20 Bakri Balloon, Packaging Type: Box, Rs 9500 /pack Gyno Care Services | ID: 18666858655. <https://www.indiamart.com/proddetail/bakri-balloon-18666858655.html> (accessed 20 Jul 2020).
- 21 Mishra S, Mohanty SK. Out-of-pocket expenditure and distress financing on institutional delivery in India. *Int J Equity Health* 2019;**18**:99. doi:10.1186/s12939-019-1001-7
- 22 Ramanathan A, Eckardt MJ, Nelson BD, *et al.* Safety of a condom uterine balloon tamponade (ESM-UBT) device for uncontrolled primary postpartum hemorrhage among facilities in Kenya and Sierra Leone. *BMC Pregnancy Childbirth* 2018;**18**:1–7. doi:10.1186/s12884-018-1808-z
- 23 Burke TF, Danso-Bamfo S, Guha M, *et al.* Shock progression and survival after use of a condom uterine balloon tamponade package in women with uncontrolled postpartum hemorrhage. *Int J Gynecol Obstet* 2017;**139**:34–8. doi:10.1002/ijgo.12251
- 24 Mollazadeh-Moghaddam K, Dundek M, Bellare A, *et al.* Mechanical Properties of the Every Second Matters for Mothers-Uterine Balloon Tamponade (ESM-UBT) Device: In Vitro Tests. *AJP Rep* 2019;**9**:E376–83. doi:10.1055/s-0039-1697653
- 25 MOHFW G of I. Indian Public Health Standards: National Health Mission. 2007. <https://nhm.gov.in/index1.php?lang=1&level=2&sublinkid=971&lid=154> (accessed 17 Apr 2020).
- 26 National Rural Health Mission. Operational Guidelines on Maternal and Newborn Health. 2009;:54.
- 27 Department of Community Medicine and School of Public Health PGIMER Chandigarh. [https://www.healthconomics.pgisph.in/costing\\_web/index.php?action=costing\\_method](https://www.healthconomics.pgisph.in/costing_web/index.php?action=costing_method) (accessed 17 Apr 2020).
- 28 Carroli G, Cuesta C, Abalos E, *et al.* Epidemiology of postpartum haemorrhage: a systematic review. *Best Pract. Res. Clin. Obstet. Gynaecol.* 2008;**22**:999–1012. doi:10.1016/j.bpobgyn.2008.08.004
- 29 Aderoba AK, Olagbuji BN, Akintan AL, *et al.* Condom-catheter tamponade for the treatment of postpartum haemorrhage and factors associated with success: a prospective observational study. *BJOG An Int J Obstet Gynaecol* 2017;**124**:1764–71. doi:10.1111/1471-0528.14361
- 30 Tasneem F, Sirsam S, Shanbhag V. Clinical study of post partum haemorrhage from a teaching hospital in Maharashtra, India. *Int J Reprod Contraception, Obstet Gynecol* 2017;**6**:2366.



- 1  
2  
3 1 doi:10.18203/2320-1770.ijrcog20172314  
4  
5 2 31 Department of Health Research. *Health Technology Assessment in India A Manual*. 2018.  
6 3 https://dhr.gov.in/ (accessed 1 Jul 2020).  
7  
8 4 32 Fox-Rushby, Julia, Cairns J. *Economic Evaluation - Fox-Rushby, Julia, Cairns, John*. 2005.  
9  
10 5 33 Venugopal P. World Development Indicators 1997. The World Bank. *Manag Labour Stud*  
11 6 1999;**24**:135–6. doi:10.1177/0258042x9902400208  
12 7 34 Marshall AL, Durani U, Bartley A, *et al*. The impact of postpartum hemorrhage on hospital length  
13 8 of stay and inpatient mortality: a National Inpatient Sample–based analysis. *Am J Obstet Gynecol*  
14 9 2017;**217**:344.e1-344.e6. doi:10.1016/j.ajog.2017.05.004  
15  
16 10 35 Joseph CM, Bhatia G, Abraham V, *et al*. Obstetric admissions to tertiary level intensive care unit –  
17 11 Prevalence, clinical characteristics and outcomes. *Indian J Anaesth* 2018;**62**:940–4.  
18 12 doi:10.4103/ija.IJA\_537\_18  
19  
20 13 36 Kumar P, Dhillon P. Length of stay after childbirth in India: A comparative study of public and  
21 14 private health institutions. *BMC Pregnancy Childbirth* 2020;**20**:181. doi:10.1186/s12884-020-  
22 15 2839-9  
23  
24 16 37 Ministry of Health and Family Welfare (Government of India). National Health Profile (NHP) of  
25 17 India- 2018 : Central Bureau of Health Intelligence. Published Online First:  
26 18 2018.https://www.cbhidghs.nic.in/index1.php?lang=1&level=2&sublinkid=88&lid=1138  
27 19 (accessed 1 Jul 2020).  
28  
29 20 38 Prinja S, Manchanda N, Aggarwal AK, *et al*. Cost & efficiency evaluation of a publicly financed  
30 21 & publicly delivered referral transport service model in three districts of Haryana State , India.  
31 22 2013;:1003–11.  
32  
33 23 39 Chauhan AS, Prinja S, Ghoshal S, *et al*. Cost of treatment for head and neck cancer in India. *PLoS*  
34 24 *One* 2018;**13**:1–13. doi:10.1371/journal.pone.0191132  
35  
36 25 40 Indicators AD. State Fact Sheet : FY 2018-2019 ( April -March ) Maharashtra Key Indicators.  
37 26 2019;**2019**.  
38  
39 27 41 Thi Win Shwe A, Riewpaiboon A, Chaikledkaew U, *et al*. Treatment cost and costing model of  
40 28 obstetric complications at a hospital in Myanmar. *PLoS One* 2019;**14**:e0213141.  
41 29 doi:10.1371/journal.pone.0213141  
42  
43 30 42 Vlassoff M, Abdalla HA, Gor V. The Cost to the Health System of Postpartum Hemorrhage in  
44 31 Egypt Key Points. Published Online First: 2016.www.guttmacher.org (accessed 6 Jun 2020).  
45  
46 32 43 CPI Inflation Calculator. https://data.bls.gov/cgi-  
47 33 bin/cpicalc.pl?cost1=27.04&year1=201506&year2=201706 (accessed 6 Jun 2020).  
48  
49 34 44 Chatterjee S, Laxminarayan R. Costs of surgical procedures in Indian hospitals. *BMJ Open*  
50 35 2013;**3**. doi:10.1136/bmjopen-2013-002844  
51  
52 36 45 Machinery NHM, Transfer F. NHM in Maharashtra : Budget Trends 2015-16 to 2018-19. 2018.  
53 37 46 National Health Mission, Ministry of Health and Family Welfare, Government of India. National  
54 38 Urban Health Mission :: National Health Mission.  
55 39 2020;**12**.https://nhm.gov.in/index1.php?lang=1&level=1&sublinkid=970&lid=137  
56  
57 40 47 Dept. of Reproductive Health and Research W. WHO recommendations for the prevention and

- 1  
2  
3 1 treatment of postpartum haemorrhage. 2012. [www.who.int/maternal\\_child\\_adolescent](http://www.who.int/maternal_child_adolescent) (accessed  
4 2 11 Jun 2020).  
5  
6 3 48 NavjaatShishu Suraksha Karyakram (NSSK). National Health Mission.  
7 4 <https://nhm.gov.in/index1.php?lang=1&level=3&sublinkid=842&lid=308> (accessed 7 Jun 2020).  
8  
9 5 49 | Ayushman Bharat | National Health Authority | GoI.  
10 6 <https://www.pmjay.gov.in/resources/documents> (accessed 7 Jun 2020).  
11  
12  
13  
14  
15  
16  
17  
18  
19  
20  
21  
22  
23  
24  
25  
26  
27  
28  
29  
30  
31  
32  
33  
34  
35  
36  
37  
38  
39  
40  
41  
42  
43  
44  
45  
46  
47  
48  
49  
50  
51  
52  
53  
54  
55  
56  
57  
58  
59  
60

For peer review only

## Supplemental material

Table 1.1: Details of the studies included in targeted literature review for the three UBT devices

| Authors           | Study design      | PPH success rate | Atonic PPH success rate | Reference |
|-------------------|-------------------|------------------|-------------------------|-----------|
| <b>Condom-UBT</b> |                   |                  |                         |           |
| Darwish et al.    | RCT               | 28/33 (84.8)     | 28/33 (84.8)            | [1]       |
| Tindell et al.    | Systematic Review | 186/193 (96.4)   | NR                      | [2]       |
| Santhanam et al.  | Prospective       | 59/61 (96.7)     | 59/61 (96.7)            | [3]       |
| Rathore et al.    | Prospective       | 17/18 (94.4)     | NR                      | [4]       |
| Aderoba et al.    | Prospective       | 203/229 (88.6)   | 193/214 (90.2)          | [5]       |
| Mishra et al.     | Prospective       | 59/60 (98.3)     | NR                      | [6]       |
| Kandeel et al.    | Prospective       | 48/50 (96.0)     | 28/28 (100)             | [7]       |
| Anger et al.      | RCT               | 56/64 (87.5)     | NR                      | [8]       |
| Dumont et al.     | RCT               | 48/57 (84.2)     | NR                      | [9]       |
| Lohano et al.     | Prospective       | 126/139 (90.6)   | 126/139 (90.6)          | [10]      |
| Hasabe et al.     | Prospective       | 34/36 (94.4)     | NR                      | [11]      |
| Yadav et al.      | Prospective       | 117/122 (95.9)   | 117/122 (95.9)          | [12]      |
| <b>Bakri-UBT</b>  |                   |                  |                         |           |
| Darwish et al.    | RCT               | 30/33 (90.9)     | 30/33 (90.9)            | [1]       |
| Revert et al.     | Prospective       | 188/226 (83.2)   | 155/183 (84.7)          | [13]      |
| Brown et al.      | Prospective       | 55/58 (94.8)     | 52/55 (94.5)            | [14]      |
| Vintejoux et al.  | Retrospective     | 25/36 (69.4)     | 25/36 (69.4)            | [15]      |
| Guo et al.        | Retrospective     | 288/305 (94.4)   | 131/142 (92.3)          | [16]      |
| Mathur et al.     | Retrospective     | 40/49 (81.6)     | 14/17 (82.4)            | [17]      |
| Wang et al.       | Prospective       | 373/407 (91.6)   | 373/407 (91.6)          | [18]      |
| Alkis et al.      | Retrospective     | 43/47 (91.5)     | NR                      | [19]      |
| Kaya et al.       | Prospective       | 34/45 (75.6)     | 27/34 (79.4)            | [20]      |
| Laas et al.       | Before and after  | 37/43 (86)       | 37/43 (86)              | [21]      |
| Olsen et al.      | Retrospective     | 25/37 (67.6)     | 17/24 (70.8)            | [22]      |
| Kong et al.       | Retrospective     | 59/81 (72.8)     | 37/59 (62.7)            | [23]      |

|                  |                                              |                     |                |      |
|------------------|----------------------------------------------|---------------------|----------------|------|
| Cetin et al.     | Retrospective                                | 29/39 (74.4)        | 29/39 (74.4)   | [24] |
| Gauchotte et al. | Before and after                             | 35/38 (92.1)        | NR             | [25] |
| Grange et al.    | Retrospective                                | 80/108 (74.1)       | 26/39 (66.7)   | [26] |
| Kadioglu et al.  | Retrospective                                | 42/50 (84)          | NR             | [27] |
| Martin et al.    | Retrospective                                | 32/49 (65.3)        | 28/42 (66.7)   | [28] |
| Ogoyama et al.   | Retrospective                                | 66/71 (93)          | 31/32 (96.9)   | [29] |
| Son et al.       | Retrospective                                | 239/306 (78.1)      | 190/241 (78.8) | [30] |
| <b>ESM-UBT</b>   |                                              |                     |                |      |
| Ramanathan et al | Prospective/<br>Retrospective case<br>series | 189/201<br>(94) *   | NR             | [31] |
| Burke et al.     | Prospective case<br>series                   | 190/201<br>(94.5) * | NR             | [32] |
| Burke et al.     | Prospective case<br>series                   | 298/306<br>(97.4) * | 298/306 (97.4) | [33] |

\* - Reported survival rates

NR – Not reported

**Table 1.2: Staff time allocation parameters used in costing analysis**

| Parameter                                                                                                          | Value in cost analysis* | Source                         |
|--------------------------------------------------------------------------------------------------------------------|-------------------------|--------------------------------|
| Average time taken for UBT device insertion                                                                        | 10 minutes              | Reported by senior most doctor |
| Average time taken for normal vaginal delivery in labour room                                                      | 7.25 hours              |                                |
| Average time taken for vaginal delivery with PPH complication, controlled after medical management in LR           | 10.25 hours             |                                |
| Average time taken for UBT device retention among those controlled with UBT                                        | 24 hours                |                                |
| Average time in operation theatre for a caesarean section without complications                                    | 45 minutes              |                                |
| Average time in operation theatre for a caesarean section with PPH complication controlled with medical management | 60 minutes              |                                |
| Average time in operation theatre for a caesarean section with PPH complication requiring UBT insertion            | 75 minutes              |                                |
| Average time for devascularization surgery after PPH                                                               | 75 minutes              |                                |
| Average time for hysterectomy after PPH                                                                            | 120 minutes             |                                |
| Average time spent in out-patient department                                                                       | 12 hours/week           |                                |
| Average time spent in indoor patient management                                                                    | 12 hours/week           |                                |
| Average time spent in operation theatre                                                                            | 12 hours/week           |                                |
| Average time spent in labour room                                                                                  | 2 hours/week            |                                |
| Average time spent in administration and documentation                                                             | 10 hours/week           |                                |
| Average time spent in teaching and training                                                                        | 5.15 hours/week         |                                |
| Average time spent in out-patient department                                                                       | 12 hours/week           |                                |
| Average time spent in indoor patient management                                                                    | 12 hours/week           |                                |
| Average time spent in operation theatre                                                                            | 6 hours/week            |                                |
| Average time spent in administrative work                                                                          | 15 hours/week           |                                |
| Average time spent in labour room by Grade 4 worker                                                                | 12 hours/week           | Reported by grade 4 worker     |
| Average time spent in operation theatre by Grade 4 worker                                                          | 12 hours/week           |                                |
| Mean length of stay for OBGYN patients in ICU                                                                      | 3.47 days               | [34]                           |
| Mean length of ICU stay for PPH patients                                                                           | 1.5 days                | [5]                            |

**Table 1.3: Literature based event probabilities used for PPH utilization calculation of healthcare facilities**

| Input                                                                                                     | Value         | Reference                                                             |
|-----------------------------------------------------------------------------------------------------------|---------------|-----------------------------------------------------------------------|
| PPH incidence in vaginal delivery                                                                         | 3 percent     | [35,36]                                                               |
| PPH incidence in caesarean delivery                                                                       | 6 percent     | [35,36]                                                               |
| Atonic PPH incidence                                                                                      | 80 percent    | [37]                                                                  |
| Atonic PPH controlled with medical management                                                             | 90 percent    | [38]                                                                  |
| Clinical effectiveness of condom-UBT device in controlling atonic PPH                                     | 92.3 percent  | Calculated from literature review of 33 studies reported in Table 1.1 |
| Clinical effectiveness of ESM-UBT device in controlling atonic PPH                                        | 95.3 percent* | Calculated from literature review of 33 studies reported in Table 1.1 |
| Clinical effectiveness of condom-UBT device in controlling atonic PPH                                     | 84.3 percent  | Calculated from literature review of 33 studies reported in Table 1.1 |
| Probability of stepwise devascularization procedure for uncontrolled atonic PPH cases after UBT insertion | 0.85          | [38]                                                                  |
| Probability of obstetric hysterectomy for uncontrolled atonic PPH cases after UBT insertion               | 0.15          | [38]                                                                  |
| Probability of delivery at primary care level                                                             | 0.19          | [39]                                                                  |
| Probability of delivery at secondary care level                                                           | 0.33          | [39]                                                                  |
| Probability of delivery at tertiary care level                                                            | 0.48          | [39]                                                                  |

\* - Estimated from limited evidence from 3 case-series studies reported in Table 1.1

PPH incidence rate in vaginal/caesarean section delivery was applied to reported number of deliveries at each health facility (Table 1.4) to estimate number of PPH and thus proportional atonic PPH cases at the facility. Proportion of these atonic PPH cases uncontrolled after medical and supportive management were eligible for UBT device insertion. Literature review based clinical effectiveness of individual UBT device determined number of patients consequently needing conservative (devascularization) or obstetric hysterectomy surgical intervention at each facility. Table 1.4 shows results of these calculations for each chosen facility.

**Table 1.4: Utilization of services for atonic PPH at chosen health facilities of Maharashtra based on primary collected data and event probabilities from literature**

| Type of Health facility | Mode of Delivery | Annual number of deliveries | Atonic PPH cases | Atonic PPH controlled with medical management | Cases requiring UBT insertion | Controlled with UBT insertion<br>Condom<br>Bakri<br>ESM | Cases requiring further intervention<br>Condom<br>Bakri<br>ESM |
|-------------------------|------------------|-----------------------------|------------------|-----------------------------------------------|-------------------------------|---------------------------------------------------------|----------------------------------------------------------------|
| PHC                     | Vaginal          | 494                         | 11.86            | 10.67                                         | 1.18                          | 1.09                                                    | 0.09                                                           |
|                         |                  |                             |                  |                                               |                               | 1.00                                                    | 0.19                                                           |
|                         |                  |                             |                  |                                               |                               | 1.13                                                    | 0.06                                                           |
| SDH                     | Vaginal          | 1526                        | 36.62            | 32.96                                         | 3.66                          | 3.41                                                    | 0.26                                                           |
|                         |                  |                             |                  |                                               |                               | 3.09                                                    | 0.57                                                           |
|                         |                  |                             |                  |                                               |                               | 3.49                                                    | 0.17                                                           |
| SDH                     | Cesarean         | 330                         | 15.84            | 14.26                                         | 1.58                          | 1.47                                                    | 0.11                                                           |
|                         |                  |                             |                  |                                               |                               | 1.34                                                    | 0.25                                                           |
|                         |                  |                             |                  |                                               |                               | 1.51                                                    | 0.07                                                           |
| DH                      | Vaginal          | 2986                        | 71.66            | 64.49                                         | 7.17                          | 6.66                                                    | 0.50                                                           |
|                         |                  |                             |                  |                                               |                               | 6.04                                                    | 1.13                                                           |
|                         |                  |                             |                  |                                               |                               | 6.83                                                    | 0.34                                                           |
| DH                      | Cesarean         | 1045                        | 50.16            | 45.14                                         | 5.02                          | 4.66                                                    | 0.35                                                           |
|                         |                  |                             |                  |                                               |                               | 4.23                                                    | 0.79                                                           |
|                         |                  |                             |                  |                                               |                               | 4.78                                                    | 0.24                                                           |
| Medical college         | Vaginal          | 2202                        | 52.84            | 47.56                                         | 5.28                          | 4.87                                                    | 0.37                                                           |
|                         |                  |                             |                  |                                               |                               | 4.44                                                    | 0.83                                                           |
|                         |                  |                             |                  |                                               |                               | 5.03                                                    | 0.25                                                           |
| Medical college         | Caesarean        | 1141                        | 54.76            | 49.29                                         | 5.47                          | 5.05                                                    | 0.42                                                           |
|                         |                  |                             |                  |                                               |                               | 4.61                                                    | 0.85                                                           |
|                         |                  |                             |                  |                                               |                               | 5.21                                                    | 0.25                                                           |

## Methodology for apportioning of unit cost estimation

### Example: Unit cost for condom-UBT insertion in labour room of the district hospital

Unit cost for condom-UBT device insertion in labour room (vaginal delivery) of the district hospital was USD 2.84 (INR 182.9). This cost along with unit cost of condom-UBT insertion in operation theatre after cesarean section delivery in district hospital was weighted to get unit cost of condom-UBT insertion at district hospital. The average of weighted insertion cost at district hospital along with similar estimated unit cost for medical college was combined to report the average condom-UBT insertion cost at tertiary level (USD 6.5 (INR 422)).

Annual consumption and price data for cost resource heads were obtained from respective sources as stated in Table 2 of the manuscript. Atonic PPH specific clinical data on number of services utilized at respective facilities as stated in Table 1.4 for specific PPH management components were apportioned to that of the total quantity of that particular service category provided at the facility by using time allocation parameters and following reported apportioning methods for each resource head to arrive at unit cost of a particular atonic PPH service delivery at the facility.

The following example describes methodology, apportioning factors and quantity of resources used in calculating unit cost for condom-UBT insertion in labour room (vaginal delivery) of the district hospital (DH). A similar methodology was used for calculation of each respective unit cost reported in the study.

1. Human resources (HR) - For total annual vaginal deliveries (2986) reported at DH, proportional time for annual condom-UBT insertions was obtained as a proportion of total time spent for all condom-UBT insertion (1.19 hours: 10 minutes for single UBT insertion, 7 UBT insertions) to that of total time for vaginal deliveries (21996 hours for 2986 vaginal deliveries) occurring at the facility (**Factor 1: 0.00054**). This time allocation factor was used to calculate proportional time spent by workforce in all condom-UBT insertions to that of their respective total annual working hours (for 19 working staff of labour room including overhead workers) (**Factor 2: 0.0000023**). For the working staff, the total annual working hours included time spent across OPD, IPD, Labour room administration, training, teaching, etc. obtained from time allocation interviews (2463 to 2934 total working hours annually). Proportion of labour room time for condom-UBT insertion to total annual working hours (in this case labour room) gave Factor 2.
2. Area - The area cost for labour room was calculated by first factoring the proportion of area used for condom-UBT insertion (labour room area-220 square feet, pharmacy-1800, blood bank-2660) to that of the total hospital area (1246881 square feet) (**Factor 1: 0.0038**). Factor 2 was time allocation proportion of annual condom-UBT insertion time to that of the total time for all patients in the labour room (**Factor 2: 0.00054**). Unit space cost for condom-UBT insertion in labour room of DH was obtained by dividing annual area cost by number of condom-UBT insertions at DH.
3. Drug cost – Available drugs and their corresponding annually utilized quantities were used to calculate total annual cost of drugs in labour room of the DH. This was then multiplied with proportion of UBT insertion eligible cases in the labour room (**Factor 1: 0.00222**) to get annualized and thus unit cost of drugs used along with condom-UBT insertion in labour room of the DH.
4. Medical and non-medical equipment – Using the expected life time of the equipment (10/15 years), a discount rate of 3 percent and an annual maintenance rate of 0.01, annualized costs were calculated. Proportional equipment time spent on condom-UBT insertion to the total time for use of equipment in labour room (**Factor 1: 0.00054**) gave annual cost of medical and non-medical equipment. This was then divided by eligible UBT beneficiaries to calculate unit cost of equipment for condom-UBT insertion in labour room of the DH.



- 1
  - 2
  - 3
  - 4
  - 5
  - 6
  - 7
  - 8
  - 9
  - 10
  - 11
  - 12
  - 13
  - 14
  - 15
  - 16
  - 17
  - 18
  - 19
  - 20
  - 21
  - 22
  - 23
  - 24
  - 25
  - 26
  - 27
  - 28
  - 29
  - 30
  - 31
  - 32
  - 33
  - 34
  - 35
  - 36
  - 37
  - 38
  - 39
  - 40
  - 41
  - 42
  - 43
  - 44
  - 45
  - 46
  - 47
  - 48
  - 49
  - 50
  - 51
  - 52
  - 53
  - 54
  - 55
  - 56
  - 57
  - 58
  - 59
  - 60
5. Electricity – As electricity was shared and accounted across the facility, it was first apportioned by proportional area for the labour room out of total facility area multiplied by 2 for electricity to get the first factor (**Factor 1: 0.00751**). The second factor for apportioning was based on proportional time spent for condom-UBT insertion in labour room (**Factor 2: 0.00054**).
6. Water – Water as a shared resource was first apportioned by proportional area for labour room out of the total facility area to get the first factor (**Factor 1: 0.00751**). The second apportioning factor was proportional time spent for condom-UBT insertion in labour room (**Factor 2: 0.00054**).
7. Laundry – Laundry was apportioned as proportion of eligible cases for condom-UBT insertion to the total indoor patients at the DH (22036). (**Factor 1: 0.000256**).

Similarly, for surgeries, the district hospital data reported a total of 1169 obstetric surgeries annually. This included 1045 cesarean sections, 39 major surgeries (non-specified) and 85 cases of female sterilization. We derived the number of expected atonic PPH specific surgeries from the given 1045 cesarean sections by applying literature probability estimates as reported in Table 1.1 and 1.2. Time allocation parameters for each type of surgery was then applied to get proportional time factors that was applied to relevant cost centres along with apportioning methods as stated to arrive at unit surgical costs.

## REFERENCES

- 1 Darwish AM, Abdallah MM, Shaaban OM, *et al.* Bakri balloon versus condom-loaded Foley's catheter for treatment of atonic postpartum hemorrhage secondary to vaginal delivery: a randomized controlled trial. *J Matern Neonatal Med* 2018;**31**:747–53. doi:10.1080/14767058.2017.1297407
- 2 Tindell K, Garfinkel R, Abu-Haydar E, *et al.* Uterine balloon tamponade for the treatment of postpartum haemorrhage in resource-poor settings: A systematic review. *BJOG An Int. J. Obstet. Gynaecol.* 2013;**120**:5–14. doi:10.1111/j.1471-0528.2012.03454.x
- 3 Santhanam R, Viswanathan RM, V. P. Condom tamponade in the management of atonic postpartum hemorrhage. *Int J Reprod Contraception, Obstet Gynecol* 2018;**7**:2276. doi:10.18203/2320-1770.ijrcog20182335
- 4 Rathore AM, Gupta S, Manaktala U, *et al.* Uterine tamponade using condom catheter balloon in the management of non-traumatic postpartum hemorrhage. *J Obstet Gynaecol Res* 2012;**38**:1162–7. doi:10.1111/j.1447-0756.2011.01843.x
- 5 Aderoba A, Olagbuji B, Akintan A, *et al.* Condom-catheter tamponade for the treatment of postpartum haemorrhage and factors associated with success: a prospective observational study. *BJOG An Int J Obstet Gynaecol* 2017;**124**:1764–71. doi:10.1111/1471-0528.14361
- 6 Mishra N, Gulabani K, Agrawal S, *et al.* Efficacy and Feasibility of Chhattisgarh Balloon and Conventional Condom Balloon Tamponade: A 2-Year Prospective Study. *J Obstet Gynecol India* 2019;**69**:133–41. doi:10.1007/s13224-018-1185-6
- 7 Kandeel M, Sanad Z, Ellakwa H, *et al.* Management of postpartum hemorrhage with intrauterine balloon tamponade using a condom catheter in an Egyptian setting. *Int J Gynecol Obstet* 2016;**135**:272–5. doi:10.1016/j.ijgo.2016.06.018
- 8 Anger HA, Dabash R, Durocher J, *et al.* The effectiveness and safety of introducing condom-catheter uterine balloon tamponade for postpartum haemorrhage at secondary level hospitals in Uganda, Egypt and Senegal: a stepped wedge, cluster-randomised trial. *BJOG An Int J Obstet Gynaecol* 2019;**126**:1612–21. doi:10.1111/1471-0528.15903
- 9 Dumont A, Bodin C, Hounkpatin B, *et al.* Uterine balloon tamponade as an adjunct to misoprostol for the treatment of uncontrolled postpartum haemorrhage: A randomised controlled trial in Benin and Mali. *BMJ Open* 2017;**7**:1–9. doi:10.1136/bmjopen-2017-016590
- 10 Lohano R, Haq G, Kazi S, *et al.* Intrauterine balloon tamponade for the control of postpartum haemorrhage. *J Pak Med Assoc* 2016;**66**:22–6.
- 11 Hasabe R, Gupta K, Rathode P. Use of Condom Tamponade to Manage Massive Obstetric Hemorrhage at a Tertiary Center in Rajasthan. *J Obstet Gynecol India* 2016;**66**:88–93. doi:10.1007/s13224-015-0790-x
- 12 Yadav S, Malhotra A. A prospective randomized comparative study of Misoprostol and balloon tamponade using condom catheter to prevent postpartum hemorrhage at M. Y. H., Indore, India in vaginal delivered patients. *Int J Reprod Contraception, Obstet Gynecol* 2019;**8**:591. doi:10.18203/2320-1770.ijrcog20190290
- 13 Revert M, Cottenet J, Raynal P, *et al.* Intrauterine balloon tamponade for management of severe postpartum haemorrhage in a perinatal network: a prospective cohort study. *BJOG An Int J Obstet Gynaecol* 2017;**124**:1255–62. doi:10.1111/1471-0528.14382
- 14 Brown H, Okeyo S, Mabeya H, *et al.* The Bakri tamponade balloon as an adjunct treatment for refractory postpartum hemorrhage. *Int J Gynecol Obstet* 2016;**135**:276–80. doi:10.1016/j.ijgo.2016.06.021
- 15 Vintejeux E, Ulrich D, Mousty E, *et al.* Success factors for Bakri™ balloon usage secondary to uterine atony: A retrospective, multicentre study. *Aust New Zeal J Obstet Gynaecol* 2015;**55**:572–7. doi:10.1111/ajo.12376
- 16 Guo Y, Hua R, Bian S, *et al.* Intrauterine Bakri Balloon and Vaginal Tamponade Combined with Abdominal Compression for the Management of Postpartum Hemorrhage. *J Obstet Gynaecol Canada* 2018;**40**:561–5. doi:10.1016/j.jogc.2017.08.035
- 17 Mathur M, Ng QJ, Tagore S. Use of Bakri balloon tamponade (BBT) for conservative management of postpartum haemorrhage: a tertiary referral centre case series. *J Obstet*

- 1  
2  
3  
4  
5  
6  
7  
8  
9  
10  
11  
12  
13  
14  
15  
16  
17  
18  
19  
20  
21  
22  
23  
24  
25  
26  
27  
28  
29  
30  
31  
32  
33  
34  
35  
36  
37  
38  
39  
40  
41  
42  
43  
44  
45  
46  
47  
48  
49  
50  
51  
52  
53  
54  
55  
56  
57  
58  
59  
60
- Gynaecol (Lahore)* 2018;**38**:66–70. doi:10.1080/01443615.2017.1328671
- 18 Wang D, Xu S, Qiu X, *et al.* Early usage of Bakri postpartum balloon in the management of postpartum hemorrhage: A large prospective, observational multicenter clinical study in South China. *J Perinat Med* 2018;**46**:649–56. doi:10.1515/jpm-2017-0249
- 19 Alkiş I, Karaman E, Han A, *et al.* The fertility sparing management of postpartum hemorrhage: A series of 47 cases of Bakri balloon tamponade. *Taiwan J Obstet Gynecol* 2015;**54**:232–5. doi:10.1016/j.tjog.2014.03.009
- 20 Kaya B, Tuten A, Daglar K, *et al.* Balloon tamponade for the management of postpartum uterine hemorrhage. *J Perinat Med* 2014;**42**:745–53. doi:10.1515/jpm-2013-0336
- 21 Laas E, Bui C, Popowski T, *et al.* Trends in the rate of invasive procedures after the addition of the intrauterine tamponade test to a protocol for management of severe postpartum hemorrhage. *Am J Obstet Gynecol* 2012;**207**:281.e1–281.e7. doi:10.1016/j.ajog.2012.08.028
- 22 Olsen R, Reisner DP, Benedetti TJ, *et al.* Bakri balloon effectiveness for postpartum hemorrhage: A ‘real world experience’. *J Matern Neonatal Med* 2013;**26**:1720–3. doi:10.3109/14767058.2013.796354
- 23 Kong CW, To WW. Prognostic factors for the use of intrauterine balloon tamponade in the management of severe postpartum hemorrhage. *Int J Gynecol Obstet* 2018;**142**:48–53. doi:10.1002/ijgo.12498
- 24 Çetin BA, Aydoğan Mathyk B, Atis Aydın A, *et al.* Comparing success rates of the Hayman compression suture and the Bakri balloon tamponade. *J Matern Neonatal Med* 2019;**32**:3034–8. doi:10.1080/14767058.2018.1455184
- 25 Gauchotte E, De La Torre M, Perdriolle-Galet E, *et al.* Impact of uterine balloon tamponade on the use of invasive procedures in severe postpartum hemorrhage. *Acta Obstet Gynecol Scand* 2017;**96**:877–82. doi:10.1111/aogs.13130
- 26 Grange J, Chatellier M, Chev e MT, *et al.* Predictors of failed intrauterine balloon tamponade for persistent postpartum hemorrhage after vaginal delivery. *PLoS One* 2018;**13**:1–11. doi:10.1371/journal.pone.0206663
- 27 Kadioglu BG, Tanriverdi EC, Aksoy AN. Balloon Tamponade in the Management of Postpartum Hemorrhage: Three Years of Experience in a Single Center. *Open J Obstet Gynecol* 2016;**06**:698–704. doi:10.4236/ojog.2016.612087
- 28 Martin E, Legendre G, Bouet PE, *et al.* Maternal outcomes after uterine balloon tamponade for postpartum hemorrhage. *Acta Obstet Gynecol Scand* 2015;**94**:399–404. doi:10.1111/aogs.12591
- 29 Ogoyama M, Takahashi H, Usui R, *et al.* Hemostatic effect of intrauterine balloon for postpartum hemorrhage with special reference to concomitant use of “holding the cervix” procedure (Matsubara). *Eur J Obstet Gynecol Reprod Biol* 2017;**210**:281–5. doi:10.1016/j.ejogrb.2017.01.012
- 30 Son M, Einerson BD, Schneider P, *et al.* Is There an Association between Indication for Intrauterine Balloon Tamponade and Balloon Failure? *Am J Perinatol* 2017;**34**:164–8. doi:10.1055/s-0036-1585084
- 31 Ramanathan A, Eckardt MJ, Nelson BD, *et al.* Safety of a condom uterine balloon tamponade (ESM-UBT) device for uncontrolled primary postpartum hemorrhage among facilities in Kenya and Sierra Leone. *BMC Pregnancy Childbirth* 2018;**18**:1–7. doi:10.1186/s12884-018-1808-z
- 32 Burke TF, Ahn R, Nelson BD, *et al.* A postpartum haemorrhage package with condom uterine balloon tamponade: a prospective multi-centre case series in Kenya, Sierra Leone, Senegal, and Nepal. *BJOG An Int J Obstet Gynaecol* 2016;**123**:1532–40. doi:10.1111/1471-0528.13550
- 33 Burke TF, Danso-Bamfo S, Guha M, *et al.* Shock progression and survival after use of a condom uterine balloon tamponade package in women with uncontrolled postpartum hemorrhage. *Int J Gynecol Obstet* 2017;**139**:34–8. doi:10.1002/ijgo.12251
- 34 Joseph CM, Bhatia G, Abraham V, *et al.* Obstetric admissions to tertiary level intensive care unit – Prevalence, clinical characteristics and outcomes. *Indian J Anaesth* 2018;**62**:940–4. doi:10.4103/ija.IJA\_537\_18
- 35 Rastogi A, Zahid. Postpartum haemorrhage | National Health Portal Of India. Natl. Heal. Portal India. 2017. <https://www.nhp.gov.in/disease/gynaecology-and-obstetrics/postpartum->

- 1  
2  
3 haemorrhage (accessed 20 Jul 2020).  
4 36 Carroli G, Cuesta C, Abalos E, *et al*. Epidemiology of postpartum haemorrhage: a systematic  
5 review. *Best Pract. Res. Clin. Obstet. Gynaecol.* 2008;**22**:999–1012.  
6 doi:10.1016/j.bpobgyn.2008.08.004  
7 37 Dutta D. *Textbook of Obstetrics*. 2015.  
8 38 Tasneem F, Sirsam S, Shanbhag V. Clinical study of post partum haemorrhage from a teaching  
9 hospital in Maharashtra, India. *Int J Reprod Contraception, Obstet Gynecol* 2017;**6**:2366.  
10 doi:10.18203/2320-1770.ijrcog20172314  
11 39 International Institute for Population Sciences. National Family Health Survey (NFHS-4)  
12 2015-16 India. *Int Inst Popul Sci ICF* 2017;:1–192. doi:kwm120 [pii]10.1093/aje/kwm120  
13  
14  
15  
16  
17  
18  
19  
20  
21  
22  
23  
24  
25  
26  
27  
28  
29  
30  
31  
32  
33  
34  
35  
36  
37  
38  
39  
40  
41  
42  
43  
44  
45  
46  
47  
48  
49  
50  
51  
52  
53  
54  
55  
56  
57  
58  
59  
60

For peer review only

**CHEERS CHECKLIST****Items to include when reporting economic evaluations of health interventions**

| <b>Section/item</b>             | <b>Item No</b> | <b>Recommendation</b>                                                                                                                                                                   | <b>Reported on page No/ line No</b>                            |
|---------------------------------|----------------|-----------------------------------------------------------------------------------------------------------------------------------------------------------------------------------------|----------------------------------------------------------------|
| <b>Title and abstract</b>       |                |                                                                                                                                                                                         |                                                                |
| Title                           | 1              | Identify the study as an economic evaluation or use more specific terms such as “cost-effectiveness analysis”, and describe the interventions compared.                                 | Page number 03, line 01 to 02                                  |
| Abstract                        | 2              | Provide a structured summary of objectives, perspective, setting, methods (including study design and inputs), results (including base case and uncertainty analyses), and conclusions. | Page number 03, line 05 to 22<br>Page number 04, line 01 to 11 |
| <b>Introduction</b>             |                |                                                                                                                                                                                         |                                                                |
| Background and objectives       | 3              | Provide an explicit statement of the broader context for the study.                                                                                                                     | Page number 08, line 01 to 07                                  |
|                                 |                | Present the study question and its relevance for health policy or practice decisions.                                                                                                   | Page number 08, line 03 to 09                                  |
| <b>Methods</b>                  |                |                                                                                                                                                                                         |                                                                |
| Target population and subgroups | 4              | Describe characteristics of the base case population and subgroups analysed, including why they were chosen.                                                                            | Page number 08, lines 13 to 17                                 |
| Setting and location            | 5              | State relevant aspects of the system(s) in which the decision(s) need(s) to be made.                                                                                                    | Page number 08, line 03 to 09<br>Page number 08, line 13 to 17 |
| Study perspective               | 6              | Describe the perspective of the study and relate this to the costs being evaluated.                                                                                                     | Page number 08, line 13 to 17                                  |
| Comparators                     | 7              | Describe the interventions or strategies being compared and state why they were chosen.                                                                                                 | Page number 06, line 14 to 22<br>Page number 07, Table 1       |

| Section/item                                           | Item No | Recommendation                                                                                                                                                                                                           | Reported on page No/ line No                                                                              |
|--------------------------------------------------------|---------|--------------------------------------------------------------------------------------------------------------------------------------------------------------------------------------------------------------------------|-----------------------------------------------------------------------------------------------------------|
|                                                        |         |                                                                                                                                                                                                                          | Page number 08, line 03 to 05                                                                             |
| Time horizon                                           | 8       | State the time horizon(s) over which costs and consequences are being evaluated and say why appropriate.                                                                                                                 | Page number 09, line 12 to 13                                                                             |
| Discount rate                                          | 9       | Report the choice of discount rate(s) used for costs and outcomes and say why appropriate.                                                                                                                               | Page number 11, line 04 to 06                                                                             |
| Choice of health outcomes                              | 10      | Describe what outcomes were used as the measure(s) of benefit in the evaluation and their relevance for the type of analysis performed.                                                                                  | Not applicable                                                                                            |
| Measurement of effectiveness                           | 11a     | <i>Single study-based estimates:</i> Describe fully the design features of the single effectiveness study and why the single study was a sufficient source of clinical effectiveness data.                               | Not applicable                                                                                            |
|                                                        | 11b     | <i>Synthesis-based estimates:</i> Describe fully the methods used for identification of included studies and synthesis of clinical effectiveness data.                                                                   | Page number 07, Table 1<br>Supplemental material, Table 1.1                                               |
| Measurement and valuation of preference-based outcomes | 12      | If applicable, describe the population and methods used to elicit preferences for outcomes.                                                                                                                              | Not applicable                                                                                            |
| Estimating resources and costs                         | 13a     | <i>Single study-based economic evaluation:</i> Describe approaches used to estimate resource use associated with the alternative interventions. Describe primary or secondary research methods for valuing each resource | Page number 09, line 11 to<br>Page number 14, line 23<br>Page number 12, Table 2<br>Supplemental material |

| Section/item                         | Item No | Recommendation                                                                                                                                                                                                                                                                                                              | Reported on page No/ line No  |
|--------------------------------------|---------|-----------------------------------------------------------------------------------------------------------------------------------------------------------------------------------------------------------------------------------------------------------------------------------------------------------------------------|-------------------------------|
|                                      |         | item in terms of its unit cost. Describe any adjustments made to approximate to opportunity costs.                                                                                                                                                                                                                          |                               |
|                                      | 13b     | <i>Model-based economic evaluation:</i> Describe approaches and data sources used to estimate resource use associated with model health states. Describe primary or secondary research methods for valuing each resource item in terms of its unit cost. Describe any adjustments made to approximate to opportunity costs. | Not applicable                |
| Currency, price date, and conversion | 14      | Report the dates of the estimated resource quantities and unit costs. Describe methods for adjusting estimated unit costs to the year of reported costs if necessary. Describe methods for converting costs into a common currency base and the exchange rate.                                                              | Page number 11, line 22 to 24 |
| Choice of model                      | 15      | Describe and give reasons for the specific type of decision-analytical model used. Providing a figure to show model structure is strongly recommended.                                                                                                                                                                      | Not applicable                |
| Assumptions                          | 16      | Describe all structural or other assumptions underpinning the decision-analytical model.                                                                                                                                                                                                                                    | Page number 14, line 04 to 15 |
| Analytical methods                   | 17      | Describe all analytical methods supporting the evaluation. This could include methods for dealing with skewed, missing, or censored data; extrapolation methods; methods for pooling data; approaches to validate or make adjustments (such as half cycle                                                                   | Page number 14, line 16 to 23 |

| Section/item                   | Item No | Recommendation                                                                                                                                                                                                                                                              | Reported on page No/ line No                                                                                                           |
|--------------------------------|---------|-----------------------------------------------------------------------------------------------------------------------------------------------------------------------------------------------------------------------------------------------------------------------------|----------------------------------------------------------------------------------------------------------------------------------------|
|                                |         | corrections) to a model; and methods for handling population heterogeneity and uncertainty.                                                                                                                                                                                 |                                                                                                                                        |
| <b>Results</b>                 |         |                                                                                                                                                                                                                                                                             |                                                                                                                                        |
| Study parameters               | 18      | Report the values, ranges, references, and, if used, probability distributions for all parameters. Report reasons or sources for distributions used to represent uncertainty where appropriate. Providing a table to show the input values is strongly recommended.         | Page number 14, line 16 to 23                                                                                                          |
| Incremental costs and outcomes | 19      | For each intervention, report mean values for the main categories of estimated costs and outcomes of interest, as well as mean differences between the comparator groups. If applicable, report incremental cost-effectiveness ratios.                                      | Page number 15, line 01 to<br>Page number 20, line 03<br>Page number 16, Table 3<br>Page number 18, Table 4<br>Page number 20, Table 5 |
| Characterising uncertainty     | 20a     | <i>Single study-based economic evaluation:</i> Describe the effects of sampling uncertainty for the estimated incremental cost and incremental effectiveness parameters, together with the impact of methodological assumptions (such as discount rate, study perspective). | Page number 16, Table 3<br>Page number 18, Table 4<br>Page number 20, Table 5                                                          |
|                                | 20b     | <i>Model-based economic evaluation:</i> Describe the effects on the results of uncertainty for all input parameters, and uncertainty related to the structure of the model and assumptions.                                                                                 | Not applicable                                                                                                                         |
| Characterising heterogeneity   | 21      | If applicable, report differences in costs, outcomes, or cost-effectiveness that can be explained by variations between subgroups of patients with different baseline                                                                                                       | Not applicable                                                                                                                         |



| Section/item                                                         | Item No | Recommendation                                                                                                                                                                                                                                    | Reported on page No/ line No                          |
|----------------------------------------------------------------------|---------|---------------------------------------------------------------------------------------------------------------------------------------------------------------------------------------------------------------------------------------------------|-------------------------------------------------------|
|                                                                      |         | characteristics or other observed variability in effects that are not reducible by more information.                                                                                                                                              |                                                       |
| <b>Discussion</b>                                                    |         |                                                                                                                                                                                                                                                   |                                                       |
| Study findings, limitations, generalisability, and current knowledge | 22      | Summarise key study findings and describe how they support the conclusions reached. Discuss limitations and the generalisability of the findings and how the findings fit with current knowledge.                                                 | Page number 21, line 02 to<br>Page number 24, line 15 |
| <b>Other</b>                                                         |         |                                                                                                                                                                                                                                                   |                                                       |
| Source of funding                                                    | 23      | Describe how the study was funded and the role of the funder in the identification, design, conduct, and reporting of the analysis. Describe other non-monetary sources of support.                                                               | Page number 25, line 19 to 21                         |
| Conflicts of interest                                                | 24      | Describe any potential for conflict of interest of study contributors in accordance with journal policy. In the absence of a journal policy, we recommend authors comply with International Committee of Medical Journal Editors recommendations. | Page number 25, line 22 to 23                         |
