# Supplementary material for: Cost of managing atonic postpartum haemorrhage with uterine balloon tamponade devices in public health settings of Maharashtra, India: an economic microcosting study
Source: PubMed Central journal article supplement — BMJ Open. 2021 Mar 2;11(3):e042389. doi: 10.1136/bmjopen-2020-042389 (PMC7929829; doi:10.1136/bmjopen-2020-042389), 2021-03-02
Supplement: bmjopen-2020-042389supp001.pdf [file bmjopen-2020-042389supp001.pdf]

## Supplemental material

Table 1.1: Details of the studies included in targeted literature review for the three UBT devices

| Authors           | Study design      | PPH success rate | Atonic PPH success rate | Reference |
|-------------------|-------------------|------------------|-------------------------|-----------|
| <b>Condom-UBT</b> |                   |                  |                         |           |
| Darwish et al.    | RCT               | 28/33 (84.8)     | 28/33 (84.8)            | [1]       |
| Tindell et al.    | Systematic Review | 186/193 (96.4)   | NR                      | [2]       |
| Santhanam et al.  | Prospective       | 59/61 (96.7)     | 59/61 (96.7)            | [3]       |
| Rathore et al.    | Prospective       | 17/18 (94.4)     | NR                      | [4]       |
| Aderoba et al.    | Prospective       | 203/229 (88.6)   | 193/214 (90.2)          | [5]       |
| Mishra et al.     | Prospective       | 59/60 (98.3)     | NR                      | [6]       |
| Kandeel et al.    | Prospective       | 48/50 (96.0)     | 28/28 (100)             | [7]       |
| Anger et al.      | RCT               | 56/64 (87.5)     | NR                      | [8]       |
| Dumont et al.     | RCT               | 48/57 (84.2)     | NR                      | [9]       |
| Lohano et al.     | Prospective       | 126/139 (90.6)   | 126/139 (90.6)          | [10]      |
| Hasabe et al.     | Prospective       | 34/36 (94.4)     | NR                      | [11]      |
| Yadav et al.      | Prospective       | 117/122 (95.9)   | 117/122 (95.9)          | [12]      |
| <b>Bakri-UBT</b>  |                   |                  |                         |           |
| Darwish et al.    | RCT               | 30/33 (90.9)     | 30/33 (90.9)            | [1]       |
| Revert et al.     | Prospective       | 188/226 (83.2)   | 155/183 (84.7)          | [13]      |
| Brown et al.      | Prospective       | 55/58 (94.8)     | 52/55 (94.5)            | [14]      |
| Vintejoux et al.  | Retrospective     | 25/36 (69.4)     | 25/36 (69.4)            | [15]      |
| Guo et al.        | Retrospective     | 288/305 (94.4)   | 131/142 (92.3)          | [16]      |
| Mathur et al.     | Retrospective     | 40/49 (81.6)     | 14/17 (82.4)            | [17]      |
| Wang et al.       | Prospective       | 373/407 (91.6)   | 373/407 (91.6)          | [18]      |
| Alkis et al.      | Retrospective     | 43/47 (91.5)     | NR                      | [19]      |
| Kaya et al.       | Prospective       | 34/45 (75.6)     | 27/34 (79.4)            | [20]      |
| Laas et al.       | Before and after  | 37/43 (86)       | 37/43 (86)              | [21]      |
| Olsen et al.      | Retrospective     | 25/37 (67.6)     | 17/24 (70.8)            | [22]      |
| Kong et al.       | Retrospective     | 59/81 (72.8)     | 37/59 (62.7)            | [23]      |

|                  |                                              |                     |                |      |
|------------------|----------------------------------------------|---------------------|----------------|------|
| Cetin et al.     | Retrospective                                | 29/39 (74.4)        | 29/39 (74.4)   | [24] |
| Gauchotte et al. | Before and after                             | 35/38 (92.1)        | NR             | [25] |
| Grange et al.    | Retrospective                                | 80/108 (74.1)       | 26/39 (66.7)   | [26] |
| Kadioglu et al.  | Retrospective                                | 42/50 (84)          | NR             | [27] |
| Martin et al.    | Retrospective                                | 32/49 (65.3)        | 28/42 (66.7)   | [28] |
| Ogoyama et al.   | Retrospective                                | 66/71 (93)          | 31/32 (96.9)   | [29] |
| Son et al.       | Retrospective                                | 239/306 (78.1)      | 190/241 (78.8) | [30] |
| <b>ESM-UBT</b>   |                                              |                     |                |      |
| Ramanathan et al | Prospective/<br>Retrospective case<br>series | 189/201<br>(94) *   | NR             | [31] |
| Burke et al.     | Prospective case<br>series                   | 190/201<br>(94.5) * | NR             | [32] |
| Burke et al.     | Prospective case<br>series                   | 298/306<br>(97.4) * | 298/306 (97.4) | [33] |

\* - Reported survival rates

NR – Not reported

**Table 1.2: Staff time allocation parameters used in costing analysis**

| Parameter                                                                                                          | Value in cost analysis* | Source                         |
|--------------------------------------------------------------------------------------------------------------------|-------------------------|--------------------------------|
| Average time taken for UBT device insertion                                                                        | 10 minutes              | Reported by senior most doctor |
| Average time taken for normal vaginal delivery in labour room                                                      | 7.25 hours              |                                |
| Average time taken for vaginal delivery with PPH complication, controlled after medical management in LR           | 10.25 hours             |                                |
| Average time taken for UBT device retention among those controlled with UBT                                        | 24 hours                |                                |
| Average time in operation theatre for a caesarean section without complications                                    | 45 minutes              |                                |
| Average time in operation theatre for a caesarean section with PPH complication controlled with medical management | 60 minutes              |                                |
| Average time in operation theatre for a caesarean section with PPH complication requiring UBT insertion            | 75 minutes              |                                |
| Average time for devascularization surgery after PPH                                                               | 75 minutes              |                                |
| Average time for hysterectomy after PPH                                                                            | 120 minutes             |                                |
| Average time spent in out-patient department                                                                       | 12 hours/week           |                                |
| Average time spent in indoor patient management                                                                    | 12 hours/week           |                                |
| Average time spent in operation theatre                                                                            | 12 hours/week           |                                |
| Average time spent in labour room                                                                                  | 2 hours/week            |                                |
| Average time spent in administration and documentation                                                             | 10 hours/week           |                                |
| Average time spent in teaching and training                                                                        | 5.15 hours/week         | Reported by sister-in-charge   |
| Average time spent in out-patient department                                                                       | 12 hours/week           |                                |
| Average time spent in indoor patient management                                                                    | 12 hours/week           |                                |
| Average time spent in operation theatre                                                                            | 6 hours/week            |                                |
| Average time spent in administrative work                                                                          | 15 hours/week           | Reported by grade 4 worker     |
| Average time spent in labour room by Grade 4 worker                                                                | 12 hours/week           |                                |
| Average time spent in operation theatre by Grade 4 worker                                                          | 12 hours/week           |                                |
| Mean length of stay for OBGYN patients in ICU                                                                      | 3.47 days               | [34]                           |
| Mean length of ICU stay for PPH patients                                                                           | 1.5 days                | [5]                            |

**Table 1.3: Literature based event probabilities used for PPH utilization calculation of healthcare facilities**

| Input                                                                                                     | Value         | Reference                                                             |
|-----------------------------------------------------------------------------------------------------------|---------------|-----------------------------------------------------------------------|
| PPH incidence in vaginal delivery                                                                         | 3 percent     | [35,36]                                                               |
| PPH incidence in caesarean delivery                                                                       | 6 percent     | [35,36]                                                               |
| Atonic PPH incidence                                                                                      | 80 percent    | [37]                                                                  |
| Atonic PPH controlled with medical management                                                             | 90 percent    | [38]                                                                  |
| Clinical effectiveness of condom-UBT device in controlling atonic PPH                                     | 92.3 percent  | Calculated from literature review of 33 studies reported in Table 1.1 |
| Clinical effectiveness of ESM-UBT device in controlling atonic PPH                                        | 95.3 percent* | Calculated from literature review of 33 studies reported in Table 1.1 |
| Clinical effectiveness of condom-UBT device in controlling atonic PPH                                     | 84.3 percent  | Calculated from literature review of 33 studies reported in Table 1.1 |
| Probability of stepwise devascularization procedure for uncontrolled atonic PPH cases after UBT insertion | 0.85          | [38]                                                                  |
| Probability of obstetric hysterectomy for uncontrolled atonic PPH cases after UBT insertion               | 0.15          | [38]                                                                  |
| Probability of delivery at primary care level                                                             | 0.19          | [39]                                                                  |
| Probability of delivery at secondary care level                                                           | 0.33          | [39]                                                                  |
| Probability of delivery at tertiary care level                                                            | 0.48          | [39]                                                                  |

\* - Estimated from limited evidence from 3 case-series studies reported in Table 1.1

PPH incidence rate in vaginal/caesarean section delivery was applied to reported number of deliveries at each health facility (Table 1.4) to estimate number of PPH and thus proportional atonic PPH cases at the facility. Proportion of these atonic PPH cases uncontrolled after medical and supportive management were eligible for UBT device insertion. Literature review based clinical effectiveness of individual UBT device determined number of patients consequently needing conservative (devascularization) or obstetric hysterectomy surgical intervention at each facility. Table 1.4 shows results of these calculations for each chosen facility.

**Table 1.4: Utilization of services for atonic PPH at chosen health facilities of Maharashtra based on primary collected data and event probabilities from literature**

| Type of Health facility | Mode of Delivery | Annual number of deliveries | Atonic PPH cases | Atonic PPH controlled with medical management | Cases requiring UBT insertion | Controlled with UBT insertion | Cases requiring further intervention |
|-------------------------|------------------|-----------------------------|------------------|-----------------------------------------------|-------------------------------|-------------------------------|--------------------------------------|
|                         |                  |                             |                  |                                               |                               | Condom Bakri ESM              | Condom Bakri ESM                     |
| PHC                     | Vaginal          | 494                         | 11.86            | 10.67                                         | 1.18                          | 1.09                          | 0.09                                 |
|                         |                  |                             |                  |                                               |                               | 1.00                          | 0.19                                 |
|                         |                  |                             |                  |                                               |                               | 1.13                          | 0.06                                 |
| SDH                     | Vaginal          | 1526                        | 36.62            | 32.96                                         | 3.66                          | 3.41                          | 0.26                                 |
|                         |                  |                             |                  |                                               |                               | 3.09                          | 0.57                                 |
|                         |                  |                             |                  |                                               |                               | 3.49                          | 0.17                                 |
|                         | Cesarean         | 330                         | 15.84            | 14.26                                         | 1.58                          | 1.47                          | 0.11                                 |
|                         |                  |                             |                  |                                               |                               | 1.34                          | 0.25                                 |
|                         |                  |                             |                  |                                               |                               | 1.51                          | 0.07                                 |
| DH                      | Vaginal          | 2986                        | 71.66            | 64.49                                         | 7.17                          | 6.66                          | 0.50                                 |
|                         |                  |                             |                  |                                               |                               | 6.04                          | 1.13                                 |
|                         |                  |                             |                  |                                               |                               | 6.83                          | 0.34                                 |
|                         | Cesarean         | 1045                        | 50.16            | 45.14                                         | 5.02                          | 4.66                          | 0.35                                 |
|                         |                  |                             |                  |                                               |                               | 4.23                          | 0.79                                 |
|                         |                  |                             |                  |                                               |                               | 4.78                          | 0.24                                 |
| Medical college         | Vaginal          | 2202                        | 52.84            | 47.56                                         | 5.28                          | 4.87                          | 0.37                                 |
|                         |                  |                             |                  |                                               |                               | 4.44                          | 0.83                                 |
|                         |                  |                             |                  |                                               |                               | 5.03                          | 0.25                                 |
|                         | Caesarean        | 1141                        | 54.76            | 49.29                                         | 5.47                          | 5.05                          | 0.42                                 |
|                         |                  |                             |                  |                                               |                               | 4.61                          | 0.85                                 |
|                         |                  |                             |                  |                                               |                               | 5.21                          | 0.25                                 |

## Methodology for apportioning of unit cost estimation

### Example: Unit cost for condom-UBT insertion in labour room of the district hospital

Unit cost for condom-UBT device insertion in labour room (vaginal delivery) of the district hospital was USD 2.84 (INR 182.9). This cost along with unit cost of condom-UBT insertion in operation theatre after cesarean section delivery in district hospital was weighted to get unit cost of condom-UBT insertion at district hospital. The average of weighted insertion cost at district hospital along with similar estimated unit cost for medical college was combined to report the average condom-UBT insertion cost at tertiary level (USD 6.5 (INR 422)).

Annual consumption and price data for cost resource heads were obtained from respective sources as stated in Table 2 of the manuscript. Atonic PPH specific clinical data on number of services utilized at respective facilities as stated in Table 1.4 for specific PPH management components were apportioned to that of the total quantity of that particular service category provided at the facility by using time allocation parameters and following reported apportioning methods for each resource head to arrive at unit cost of a particular atonic PPH service delivery at the facility.

The following example describes methodology, apportioning factors and quantity of resources used in calculating unit cost for condom-UBT insertion in labour room (vaginal delivery) of the district hospital (DH). A similar methodology was used for calculation of each respective unit cost reported in the study.

1. Human resources (HR) - For total annual vaginal deliveries (2986) reported at DH, proportional time for annual condom-UBT insertions was obtained as a proportion of total time spent for all condom-UBT insertion (1.19 hours: 10 minutes for single UBT insertion, 7 UBT insertions) to that of total time for vaginal deliveries (21996 hours for 2986 vaginal deliveries) occurring at the facility (**Factor 1: 0.00054**). This time allocation factor was used to calculate proportional time spent by workforce in all condom-UBT insertions to that of their respective total annual working hours (for 19 working staff of labour room including overhead workers) (**Factor 2: 0.0000023**). For the working staff, the total annual working hours included time spent across OPD, IPD, Labour room administration, training, teaching, etc. obtained from time allocation interviews (2463 to 2934 total working hours annually). Proportion of labour room time for condom-UBT insertion to total annual working hours (in this case labour room) gave Factor 2.
2. Area - The area cost for labour room was calculated by first factoring the proportion of area used for condom-UBT insertion (labour room area-220 square feet, pharmacy-1800, blood bank-2660) to that of the total hospital area (1246881 square feet) (**Factor 1: 0.0038**). Factor 2 was time allocation proportion of annual condom-UBT insertion time to that of the total time for all patients in the labour room (**Factor 2: 0.00054**). Unit space cost for condom-UBT insertion in labour room of DH was obtained by dividing annual area cost by number of condom-UBT insertions at DH.
3. Drug cost – Available drugs and their corresponding annually utilized quantities were used to calculate total annual cost of drugs in labour room of the DH. This was then multiplied with proportion of UBT insertion eligible cases in the labour room (**Factor 1: 0.00222**) to get annualized and thus unit cost of drugs used along with condom-UBT insertion in labour room of the DH.
4. Medical and non-medical equipment – Using the expected life time of the equipment (10/15 years), a discount rate of 3 percent and an annual maintenance rate of 0.01, annualized costs were calculated. Proportional equipment time spent on condom-UBT insertion to the total time for use of equipment in labour room (**Factor 1: 0.00054**) gave annual cost of medical and non-medical equipment. This was then divided by eligible UBT beneficiaries to calculate unit cost of equipment for condom-UBT insertion in labour room of the DH.

5. Electricity – As electricity was shared and accounted across the facility, it was first apportioned by proportional area for the labour room out of total facility area multiplied by 2 for electricity to get the first factor (**Factor 1: 0.00751**). The second factor for apportioning was based on proportional time spent for condom-UBT insertion in labour room (**Factor 2: 0.00054**).
6. Water – Water as a shared resource was first apportioned by proportional area for labour room out of the total facility area to get the first factor (**Factor 1: 0.00751**). The second apportioning factor was proportional time spent for condom-UBT insertion in labour room (**Factor 2: 0.00054**).
7. Laundry – Laundry was apportioned as proportion of eligible cases for condom-UBT insertion to the total indoor patients at the DH (22036). (**Factor 1: 0.000256**).

Similarly, for surgeries, the district hospital data reported a total of 1169 obstetric surgeries annually. This included 1045 cesarean sections, 39 major surgeries (non-specified) and 85 cases of female sterilization. We derived the number of expected atonic PPH specific surgeries from the given 1045 cesarean sections by applying literature probability estimates as reported in Table 1.1 and 1.2. Time allocation parameters for each type of surgery was then applied to get proportional time factors that was applied to relevant cost centres along with apportioning methods as stated to arrive at unit surgical costs.

## REFERENCES

- 1 Darwish AM, Abdallah MM, Shaaban OM, *et al.* Bakri balloon versus condom-loaded Foley's catheter for treatment of atonic postpartum hemorrhage secondary to vaginal delivery: a randomized controlled trial. *J Matern Neonatal Med* 2018;**31**:747–53. doi:10.1080/14767058.2017.1297407
- 2 Tindell K, Garfinkel R, Abu-Haydar E, *et al.* Uterine balloon tamponade for the treatment of postpartum haemorrhage in resource-poor settings: A systematic review. *BJOG An Int J Obstet Gynaecol*. 2013;**120**:5–14. doi:10.1111/j.1471-0528.2012.03454.x
- 3 Santhanam R, Viswanathan RM, V. P. Condom tamponade in the management of atonic postpartum hemorrhage. *Int J Reprod Contraception, Obstet Gynecol* 2018;**7**:2276. doi:10.18203/2320-1770.ijrcog20182335
- 4 Rathore AM, Gupta S, Manaktala U, *et al.* Uterine tamponade using condom catheter balloon in the management of non-traumatic postpartum hemorrhage. *J Obstet Gynaecol Res* 2012;**38**:1162–7. doi:10.1111/j.1447-0756.2011.01843.x
- 5 Aderoba A, Olagbuji B, Akintan A, *et al.* Condom-catheter tamponade for the treatment of postpartum haemorrhage and factors associated with success: a prospective observational study. *BJOG An Int J Obstet Gynaecol* 2017;**124**:1764–71. doi:10.1111/1471-0528.14361
- 6 Mishra N, Gulabani K, Agrawal S, *et al.* Efficacy and Feasibility of Chhattisgarh Balloon and Conventional Condom Balloon Tamponade: A 2-Year Prospective Study. *J Obstet Gynecol India* 2019;**69**:133–41. doi:10.1007/s13224-018-1185-6
- 7 Kandeel M, Sanad Z, Ellakwa H, *et al.* Management of postpartum hemorrhage with intrauterine balloon tamponade using a condom catheter in an Egyptian setting. *Int J Gynecol Obstet* 2016;**135**:272–5. doi:10.1016/j.ijgo.2016.06.018
- 8 Anger HA, Dabash R, Durocher J, *et al.* The effectiveness and safety of introducing condom-catheter uterine balloon tamponade for postpartum haemorrhage at secondary level hospitals in Uganda, Egypt and Senegal: a stepped wedge, cluster-randomised trial. *BJOG An Int J Obstet Gynaecol* 2019;**126**:1612–21. doi:10.1111/1471-0528.15903
- 9 Dumont A, Bodin C, Hounkpatin B, *et al.* Uterine balloon tamponade as an adjunct to misoprostol for the treatment of uncontrolled postpartum haemorrhage: A randomised controlled trial in Benin and Mali. *BMJ Open* 2017;**7**:1–9. doi:10.1136/bmjopen-2017-016590
- 10 Lohano R, Haq G, Kazi S, *et al.* Intrauterine balloon tamponade for the control of postpartum haemorrhage. *J Pak Med Assoc* 2016;**66**:22–6.
- 11 Hasabe R, Gupta K, Rathode P. Use of Condom Tamponade to Manage Massive Obstetric Hemorrhage at a Tertiary Center in Rajasthan. *J Obstet Gynecol India* 2016;**66**:88–93. doi:10.1007/s13224-015-0790-x
- 12 Yadav S, Malhotra A. A prospective randomized comparative study of Misoprostol and balloon tamponade using condom catheter to prevent postpartum hemorrhage at M. Y. H., Indore, India in vaginal delivered patients. *Int J Reprod Contraception, Obstet Gynecol* 2019;**8**:591. doi:10.18203/2320-1770.ijrcog20190290
- 13 Revert M, Cottenet J, Raynal P, *et al.* Intrauterine balloon tamponade for management of severe postpartum haemorrhage in a perinatal network: a prospective cohort study. *BJOG An Int J Obstet Gynaecol* 2017;**124**:1255–62. doi:10.1111/1471-0528.14382
- 14 Brown H, Okeyo S, Mabeya H, *et al.* The Bakri tamponade balloon as an adjunct treatment for refractory postpartum hemorrhage. *Int J Gynecol Obstet* 2016;**135**:276–80. doi:10.1016/j.ijgo.2016.06.021
- 15 Vintejou E, Ulrich D, Mousty E, *et al.* Success factors for Bakri™ balloon usage secondary to uterine atony: A retrospective, multicentre study. *Aust New Zeal J Obstet Gynaecol* 2015;**55**:572–7. doi:10.1111/ajo.12376
- 16 Guo Y, Hua R, Bian S, *et al.* Intrauterine Bakri Balloon and Vaginal Tamponade Combined with Abdominal Compression for the Management of Postpartum Hemorrhage. *J Obstet Gynaecol Canada* 2018;**40**:561–5. doi:10.1016/j.jogc.2017.08.035
- 17 Mathur M, Ng QJ, Tagore S. Use of Bakri balloon tamponade (BBT) for conservative management of postpartum haemorrhage: a tertiary referral centre case series. *J Obstet*



- Gynaecol (Lahore)* 2018;**38**:66–70. doi:10.1080/01443615.2017.1328671
- 18 Wang D, Xu S, Qiu X, *et al.* Early usage of Bakri postpartum balloon in the management of postpartum hemorrhage: A large prospective, observational multicenter clinical study in South China. *J Perinat Med* 2018;**46**:649–56. doi:10.1515/jpm-2017-0249
- 19 Alkiş I, Karaman E, Han A, *et al.* The fertility sparing management of postpartum hemorrhage: A series of 47 cases of Bakri balloon tamponade. *Taiwan J Obstet Gynecol* 2015;**54**:232–5. doi:10.1016/j.tjog.2014.03.009
- 20 Kaya B, Tuten A, Daglar K, *et al.* Balloon tamponade for the management of postpartum uterine hemorrhage. *J Perinat Med* 2014;**42**:745–53. doi:10.1515/jpm-2013-0336
- 21 Laas E, Bui C, Popowski T, *et al.* Trends in the rate of invasive procedures after the addition of the intrauterine tamponade test to a protocol for management of severe postpartum hemorrhage. *Am J Obstet Gynecol* 2012;**207**:281.e1-281.e7. doi:10.1016/j.ajog.2012.08.028
- 22 Olsen R, Reisner DP, Benedetti TJ, *et al.* Bakri balloon effectiveness for postpartum hemorrhage: A ‘real world experience’. *J Matern Neonatal Med* 2013;**26**:1720–3. doi:10.3109/14767058.2013.796354
- 23 Kong CW, To WW. Prognostic factors for the use of intrauterine balloon tamponade in the management of severe postpartum hemorrhage. *Int J Gynecol Obstet* 2018;**142**:48–53. doi:10.1002/ijgo.12498
- 24 Çetin BA, Aydoğan Mathyk B, Atis Aydin A, *et al.* Comparing success rates of the Hayman compression suture and the Bakri balloon tamponade. *J Matern Neonatal Med* 2019;**32**:3034–8. doi:10.1080/14767058.2018.1455184
- 25 Gauchotte E, De La Torre M, Perdriolle-Galet E, *et al.* Impact of uterine balloon tamponade on the use of invasive procedures in severe postpartum hemorrhage. *Acta Obstet Gynecol Scand* 2017;**96**:877–82. doi:10.1111/aogs.13130
- 26 Grange J, Chatellier M, Chev e MT, *et al.* Predictors of failed intrauterine balloon tamponade for persistent postpartum hemorrhage after vaginal delivery. *PLoS One* 2018;**13**:1–11. doi:10.1371/journal.pone.0206663
- 27 Kadioglu BG, Tanriverdi EC, Aksoy AN. Balloon Tamponade in the Management of Postpartum Hemorrhage: Three Years of Experience in a Single Center. *Open J Obstet Gynecol* 2016;**06**:698–704. doi:10.4236/ojog.2016.612087
- 28 Martin E, Legendre G, Bouet PE, *et al.* Maternal outcomes after uterine balloon tamponade for postpartum hemorrhage. *Acta Obstet Gynecol Scand* 2015;**94**:399–404. doi:10.1111/aogs.12591
- 29 Ogoyama M, Takahashi H, Usui R, *et al.* Hemostatic effect of intrauterine balloon for postpartum hemorrhage with special reference to concomitant use of “holding the cervix” procedure (Matsubara). *Eur J Obstet Gynecol Reprod Biol* 2017;**210**:281–5. doi:10.1016/j.ejogrb.2017.01.012
- 30 Son M, Einerson BD, Schneider P, *et al.* Is There an Association between Indication for Intrauterine Balloon Tamponade and Balloon Failure? *Am J Perinatol* 2017;**34**:164–8. doi:10.1055/s-0036-1585084
- 31 Ramanathan A, Eckardt MJ, Nelson BD, *et al.* Safety of a condom uterine balloon tamponade (ESM-UBT) device for uncontrolled primary postpartum hemorrhage among facilities in Kenya and Sierra Leone. *BMC Pregnancy Childbirth* 2018;**18**:1–7. doi:10.1186/s12884-018-1808-z
- 32 Burke TF, Ahn R, Nelson BD, *et al.* A postpartum haemorrhage package with condom uterine balloon tamponade: a prospective multi-centre case series in Kenya, Sierra Leone, Senegal, and Nepal. *BJOG An Int J Obstet Gynaecol* 2016;**123**:1532–40. doi:10.1111/1471-0528.13550
- 33 Burke TF, Danso-Bamfo S, Guha M, *et al.* Shock progression and survival after use of a condom uterine balloon tamponade package in women with uncontrolled postpartum hemorrhage. *Int J Gynecol Obstet* 2017;**139**:34–8. doi:10.1002/ijgo.12251
- 34 Joseph CM, Bhatia G, Abraham V, *et al.* Obstetric admissions to tertiary level intensive care unit – Prevalence, clinical characteristics and outcomes. *Indian J Anaesth* 2018;**62**:940–4. doi:10.4103/ija.IJA\_537\_18
- 35 Rastogi A, Zahid. Postpartum haemorrhage | National Health Portal Of India. Natl. Heal. Portal India. 2017. <https://www.nhp.gov.in/disease/gynaecology-and-obstetrics/postpartum->

- haemorrhage (accessed 20 Jul 2020).
- 36 Carroli G, Cuesta C, Abalos E, *et al*. Epidemiology of postpartum haemorrhage: a systematic review. *Best Pract. Res. Clin. Obstet. Gynaecol.* 2008;**22**:999–1012. doi:10.1016/j.bpobgyn.2008.08.004
  - 37 Dutta D. *Textbook of Obstetrics*. 2015.
  - 38 Tasneem F, Sirsam S, Shanbhag V. Clinical study of post partum haemorrhage from a teaching hospital in Maharashtra, India. *Int J Reprod Contraception, Obstet Gynecol* 2017;**6**:2366. doi:10.18203/2320-1770.ijrcog20172314
  - 39 International Institute for Population Sciences. National Family Health Survey (NFHS-4) 2015-16 India. *Int Inst Popul Sci ICF* 2017;;1–192. doi:kwm120 [pii]10.1093/aje/kwm120
