# Supplementary material for: Cost of managing atonic postpartum haemorrhage with uterine balloon tamponade devices in public health settings of Maharashtra, India: an economic microcosting study
Source: PubMed Central journal article supplement — BMJ Open. 2021 Mar 2;11(3):e042389. doi: 10.1136/bmjopen-2020-042389 (PMC7929829; doi:10.1136/bmjopen-2020-042389), 2021-03-02
Supplement: bmjopen-2020-042389supp002.pdf [file bmjopen-2020-042389supp002.pdf]

## Supplemental material

Table 1.1: Details of the studies included in targeted literature review for the three UBT devices

| Authors           | Study design      | PPH success rate | Atonic PPH success rate | Reference |
|-------------------|-------------------|------------------|-------------------------|-----------|
| <b>Condom-UBT</b> |                   |                  |                         |           |
| Darwish et al.    | RCT               | 28/33 (84.8)     | 28/33 (84.8)            | [1]       |
| Tindell et al.    | Systematic Review | 186/193 (96.4)   | NR                      | [2]       |
| Santhanam et al.  | Prospective       | 59/61 (96.7)     | 59/61 (96.7)            | [3]       |
| Rathore et al.    | Prospective       | 17/18 (94.4)     | NR                      | [4]       |
| Aderoba et al.    | Prospective       | 203/229 (88.6)   | 193/214 (90.2)          | [5]       |
| Mishra et al.     | Prospective       | 59/60 (98.3)     | NR                      | [6]       |
| Kandeel et al.    | Prospective       | 48/50 (96.0)     | 28/28 (100)             | [7]       |
| Anger et al.      | RCT               | 56/64 (87.5)     | NR                      | [8]       |
| Dumont et al.     | RCT               | 48/57 (84.2)     | NR                      | [9]       |
| Lohano et al.     | Prospective       | 126/139 (90.6)   | 126/139 (90.6)          | [10]      |
| Hasabe et al.     | Prospective       | 34/36 (94.4)     | NR                      | [11]      |
| Yadav et al.      | Prospective       | 117/122 (95.9)   | 117/122 (95.9)          | [12]      |
| <b>Bakri-UBT</b>  |                   |                  |                         |           |
| Darwish et al.    | RCT               | 30/33 (90.9)     | 30/33 (90.9)            | [1]       |
| Revert et al.     | Prospective       | 188/226 (83.2)   | 155/183 (84.7)          | [13]      |
| Brown et al.      | Prospective       | 55/58 (94.8)     | 52/55 (94.5)            | [14]      |
| Vintejoux et al.  | Retrospective     | 25/36 (69.4)     | 25/36 (69.4)            | [15]      |
| Guo et al.        | Retrospective     | 288/305 (94.4)   | 131/142 (92.3)          | [16]      |
| Mathur et al.     | Retrospective     | 40/49 (81.6)     | 14/17 (82.4)            | [17]      |
| Wang et al.       | Prospective       | 373/407 (91.6)   | 373/407 (91.6)          | [18]      |
| Alkis et al.      | Retrospective     | 43/47 (91.5)     | NR                      | [19]      |
| Kaya et al.       | Prospective       | 34/45 (75.6)     | 27/34 (79.4)            | [20]      |
| Laas et al.       | Before and after  | 37/43 (86)       | 37/43 (86)              | [21]      |
| Olsen et al.      | Retrospective     | 25/37 (67.6)     | 17/24 (70.8)            | [22]      |
| Kong et al.       | Retrospective     | 59/81 (72.8)     | 37/59 (62.7)            | [23]      |

|                  |                                              |                     |                |      |
|------------------|----------------------------------------------|---------------------|----------------|------|
| Cetin et al.     | Retrospective                                | 29/39 (74.4)        | 29/39 (74.4)   | [24] |
| Gauchotte et al. | Before and after                             | 35/38 (92.1)        | NR             | [25] |
| Grange et al.    | Retrospective                                | 80/108 (74.1)       | 26/39 (66.7)   | [26] |
| Kadioglu et al.  | Retrospective                                | 42/50 (84)          | NR             | [27] |
| Martin et al.    | Retrospective                                | 32/49 (65.3)        | 28/42 (66.7)   | [28] |
| Ogoyama et al.   | Retrospective                                | 66/71 (93)          | 31/32 (96.9)   | [29] |
| Son et al.       | Retrospective                                | 239/306 (78.1)      | 190/241 (78.8) | [30] |
| <b>ESM-UBT</b>   |                                              |                     |                |      |
| Ramanathan et al | Prospective/<br>Retrospective case<br>series | 189/201<br>(94) *   | NR             | [31] |
| Burke et al.     | Prospective case<br>series                   | 190/201<br>(94.5) * | NR             | [32] |
| Burke et al.     | Prospective case<br>series                   | 298/306<br>(97.4) * | 298/306 (97.4) | [33] |

\* - Reported survival rates

NR – Not reported

## REFERENCES

- 1 Darwish AM, Abdallah MM, Shaaban OM, *et al.* Bakri balloon versus condom-loaded Foley's catheter for treatment of atonic postpartum hemorrhage secondary to vaginal delivery: a randomized controlled trial. *J Matern Neonatal Med* 2018;**31**:747–53. doi:10.1080/14767058.2017.1297407
- 2 Tindell K, Garfinkel R, Abu-Haydar E, *et al.* Uterine balloon tamponade for the treatment of postpartum haemorrhage in resource-poor settings: A systematic review. *BJOG An Int J Obstet Gynaecol*. 2013;**120**:5–14. doi:10.1111/j.1471-0528.2012.03454.x
- 3 Santhanam R, Viswanathan RM, V. P. Condom tamponade in the management of atonic postpartum hemorrhage. *Int J Reprod Contraception, Obstet Gynecol* 2018;**7**:2276. doi:10.18203/2320-1770.ijrcog20182335
- 4 Rathore AM, Gupta S, Manaktala U, *et al.* Uterine tamponade using condom catheter balloon in the management of non-traumatic postpartum hemorrhage. *J Obstet Gynaecol Res* 2012;**38**:1162–7. doi:10.1111/j.1447-0756.2011.01843.x
- 5 Aderoba A, Olagbuji B, Akintan A, *et al.* Condom-catheter tamponade for the treatment of postpartum haemorrhage and factors associated with success: a prospective observational study. *BJOG An Int J Obstet Gynaecol* 2017;**124**:1764–71. doi:10.1111/1471-0528.14361
- 6 Mishra N, Gulabani K, Agrawal S, *et al.* Efficacy and Feasibility of Chhattisgarh Balloon and Conventional Condom Balloon Tamponade: A 2-Year Prospective Study. *J Obstet Gynecol India* 2019;**69**:133–41. doi:10.1007/s13224-018-1185-6
- 7 Kandeel M, Sanad Z, Ellakwa H, *et al.* Management of postpartum hemorrhage with intrauterine balloon tamponade using a condom catheter in an Egyptian setting. *Int J Gynecol Obstet* 2016;**135**:272–5. doi:10.1016/j.ijgo.2016.06.018
- 8 Anger HA, Dabash R, Durocher J, *et al.* The effectiveness and safety of introducing condom-catheter uterine balloon tamponade for postpartum haemorrhage at secondary level hospitals in Uganda, Egypt and Senegal: a stepped wedge, cluster-randomised trial. *BJOG An Int J Obstet Gynaecol* 2019;**126**:1612–21. doi:10.1111/1471-0528.15903
- 9 Dumont A, Bodin C, Hounkpatin B, *et al.* Uterine balloon tamponade as an adjunct to misoprostol for the treatment of uncontrolled postpartum haemorrhage: A randomised controlled trial in Benin and Mali. *BMJ Open* 2017;**7**:1–9. doi:10.1136/bmjopen-2017-016590
- 10 Lohano R, Haq G, Kazi S, *et al.* Intrauterine balloon tamponade for the control of postpartum haemorrhage. *J Pak Med Assoc* 2016;**66**:22–6.
- 11 Hasabe R, Gupta K, Rathode P. Use of Condom Tamponade to Manage Massive Obstetric Hemorrhage at a Tertiary Center in Rajasthan. *J Obstet Gynecol India* 2016;**66**:88–93. doi:10.1007/s13224-015-0790-x
- 12 Yadav S, Malhotra A. A prospective randomized comparative study of Misoprostol and balloon tamponade using condom catheter to prevent postpartum hemorrhage at M. Y. H., Indore, India in vaginal delivered patients. *Int J Reprod Contraception, Obstet Gynecol* 2019;**8**:591. doi:10.18203/2320-1770.ijrcog20190290
- 13 Revert M, Cottenet J, Raynal P, *et al.* Intrauterine balloon tamponade for management of severe postpartum haemorrhage in a perinatal network: a prospective cohort study. *BJOG An Int J Obstet Gynaecol* 2017;**124**:1255–62. doi:10.1111/1471-0528.14382
- 14 Brown H, Okeyo S, Mabeya H, *et al.* The Bakri tamponade balloon as an adjunct treatment for refractory postpartum hemorrhage. *Int J Gynecol Obstet* 2016;**135**:276–80. doi:10.1016/j.ijgo.2016.06.021
- 15 Vintejeux E, Ulrich D, Mousty E, *et al.* Success factors for Bakri™ balloon usage secondary to uterine atony: A retrospective, multicentre study. *Aust New Zeal J Obstet Gynaecol* 2015;**55**:572–7. doi:10.1111/ajo.12376
- 16 Guo Y, Hua R, Bian S, *et al.* Intrauterine Bakri Balloon and Vaginal Tamponade Combined with Abdominal Compression for the Management of Postpartum Hemorrhage. *J Obstet Gynaecol Canada* 2018;**40**:561–5. doi:10.1016/j.jogc.2017.08.035
- 17 Mathur M, Ng QJ, Tagore S. Use of Bakri balloon tamponade (BBT) for conservative management of postpartum haemorrhage: a tertiary referral centre case series. *J Obstet*

- Gynaecol (Lahore)* 2018;**38**:66–70. doi:10.1080/01443615.2017.1328671
- 18 Wang D, Xu S, Qiu X, *et al.* Early usage of Bakri postpartum balloon in the management of postpartum hemorrhage: A large prospective, observational multicenter clinical study in South China. *J Perinat Med* 2018;**46**:649–56. doi:10.1515/jpm-2017-0249
- 19 Alkiş I, Karaman E, Han A, *et al.* The fertility sparing management of postpartum hemorrhage: A series of 47 cases of Bakri balloon tamponade. *Taiwan J Obstet Gynecol* 2015;**54**:232–5. doi:10.1016/j.tjog.2014.03.009
- 20 Kaya B, Tuten A, Daglar K, *et al.* Balloon tamponade for the management of postpartum uterine hemorrhage. *J Perinat Med* 2014;**42**:745–53. doi:10.1515/jpm-2013-0336
- 21 Laas E, Bui C, Popowski T, *et al.* Trends in the rate of invasive procedures after the addition of the intrauterine tamponade test to a protocol for management of severe postpartum hemorrhage. *Am J Obstet Gynecol* 2012;**207**:281.e1-281.e7. doi:10.1016/j.ajog.2012.08.028
- 22 Olsen R, Reisner DP, Benedetti TJ, *et al.* Bakri balloon effectiveness for postpartum hemorrhage: A ‘real world experience’. *J Matern Neonatal Med* 2013;**26**:1720–3. doi:10.3109/14767058.2013.796354
- 23 Kong CW, To WW. Prognostic factors for the use of intrauterine balloon tamponade in the management of severe postpartum hemorrhage. *Int J Gynecol Obstet* 2018;**142**:48–53. doi:10.1002/ijgo.12498
- 24 Çetin BA, Aydoğan Mathyk B, Atis Aydin A, *et al.* Comparing success rates of the Hayman compression suture and the Bakri balloon tamponade. *J Matern Neonatal Med* 2019;**32**:3034–8. doi:10.1080/14767058.2018.1455184
- 25 Gauchotte E, De La Torre M, Perdriolle-Galet E, *et al.* Impact of uterine balloon tamponade on the use of invasive procedures in severe postpartum hemorrhage. *Acta Obstet Gynecol Scand* 2017;**96**:877–82. doi:10.1111/aogs.13130
- 26 Grange J, Chatellier M, Chev e MT, *et al.* Predictors of failed intrauterine balloon tamponade for persistent postpartum hemorrhage after vaginal delivery. *PLoS One* 2018;**13**:1–11. doi:10.1371/journal.pone.0206663
- 27 Kadioglu BG, Tanriverdi EC, Aksoy AN. Balloon Tamponade in the Management of Postpartum Hemorrhage: Three Years of Experience in a Single Center. *Open J Obstet Gynecol* 2016;**06**:698–704. doi:10.4236/ojog.2016.612087
- 28 Martin E, Legendre G, Bouet PE, *et al.* Maternal outcomes after uterine balloon tamponade for postpartum hemorrhage. *Acta Obstet Gynecol Scand* 2015;**94**:399–404. doi:10.1111/aogs.12591
- 29 Ogoyama M, Takahashi H, Usui R, *et al.* Hemostatic effect of intrauterine balloon for postpartum hemorrhage with special reference to concomitant use of “holding the cervix” procedure (Matsubara). *Eur J Obstet Gynecol Reprod Biol* 2017;**210**:281–5. doi:10.1016/j.ejogrb.2017.01.012
- 30 Son M, Einerson BD, Schneider P, *et al.* Is There an Association between Indication for Intrauterine Balloon Tamponade and Balloon Failure? *Am J Perinatol* 2017;**34**:164–8. doi:10.1055/s-0036-1585084
- 31 Ramanathan A, Eckardt MJ, Nelson BD, *et al.* Safety of a condom uterine balloon tamponade (ESM-UBT) device for uncontrolled primary postpartum hemorrhage among facilities in Kenya and Sierra Leone. *BMC Pregnancy Childbirth* 2018;**18**:1–7. doi:10.1186/s12884-018-1808-z
- 32 Burke TF, Ahn R, Nelson BD, *et al.* A postpartum haemorrhage package with condom uterine balloon tamponade: a prospective multi-centre case series in Kenya, Sierra Leone, Senegal, and Nepal. *BJOG An Int J Obstet Gynaecol* 2016;**123**:1532–40. doi:10.1111/1471-0528.13550
- 33 Burke TF, Danso-Bamfo S, Guha M, *et al.* Shock progression and survival after use of a condom uterine balloon tamponade package in women with uncontrolled postpartum hemorrhage. *Int J Gynecol Obstet* 2017;**139**:34–8. doi:10.1002/ijgo.12251
- 34 Joseph CM, Bhatia G, Abraham V, *et al.* Obstetric admissions to tertiary level intensive care unit – Prevalence, clinical characteristics and outcomes. *Indian J Anaesth* 2018;**62**:940–4. doi:10.4103/ija.IJA\_537\_18
- 35 Rastogi A, Zahid. Postpartum haemorrhage | National Health Portal Of India. Natl. Heal. Portal India. 2017.<https://www.nhp.gov.in/disease/gynaecology-and-obstetrics/postpartum->

- haemorrhage (accessed 20 Jul 2020).
- 36 Carroli G, Cuesta C, Abalos E, *et al*. Epidemiology of postpartum haemorrhage: a systematic review. *Best Pract. Res. Clin. Obstet. Gynaecol.* 2008;**22**:999–1012. doi:10.1016/j.bpobgyn.2008.08.004
- 37 Dutta D. *Textbook of Obstetrics*. 2015.
- 38 Tasneem F, Sirsam S, Shanbhag V. Clinical study of post partum haemorrhage from a teaching hospital in Maharashtra, India. *Int J Reprod Contraception, Obstet Gynecol* 2017;**6**:2366. doi:10.18203/2320-1770.ijrcog20172314
- 39 International Institute for Population Sciences. National Family Health Survey (NFHS-4) 2015-16 India. *Int Inst Popul Sci ICF* 2017;;1–192. doi:kwm120 [pii]10.1093/aje/kwm120
